# Supplementary material for: Impairment of brainstem implicit learning paradigms differentiates multiple system atrophy (MSA) from idiopathic Parkinson syndrome
Source: PubMed Central journal article supplement — BMJ Open. 2013 Sep 13;3(9):e003098. doi: 10.1136/bmjopen-2013-003098 (PMC3773641; doi:10.1136/bmjopen-2013-003098), 2013-09-13
Supplement: bmjopen-2013-003098.draft_revisions.pdf [file bmjopen-2013-003098.draft_revisions.pdf]

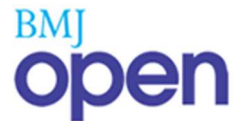

**Impairment of brainstem implicit learning paradigms differentiates multiple system atrophy (MSA) from idiopathic Parkinson syndrome**

|                                 |                                                                                                                                                                                                                                                                                                                 |
|---------------------------------|-----------------------------------------------------------------------------------------------------------------------------------------------------------------------------------------------------------------------------------------------------------------------------------------------------------------|
| Journal:                        | <i>BMJ Open</i>                                                                                                                                                                                                                                                                                                 |
| Manuscript ID:                  | bmjopen-2013-003098                                                                                                                                                                                                                                                                                             |
| Article Type:                   | Research                                                                                                                                                                                                                                                                                                        |
| Date Submitted by the Author:   | 22-Apr-2013                                                                                                                                                                                                                                                                                                     |
| Complete List of Authors:       | Von Lewinski, Friederike; University of Goettingen, Clinical Neurophysiology<br>Schwan, Michaela; Praxis Dr. Karlbauer, Paulus, Walter; University of Goettingen, Clinical Neurophysiology<br>Trenkwalder, Claudia; Paracelsus-Elena-Klinik, Sommer, Martin; University of Goettingen, Clinical Neurophysiology |
| <b>Primary Subject Heading</b>: | Neurology                                                                                                                                                                                                                                                                                                       |
| Secondary Subject Heading:      | Neurology                                                                                                                                                                                                                                                                                                       |
| Keywords:                       | Parkinson-s disease < NEUROLOGY, NEUROPHYSIOLOGY, Adult neurology < NEUROLOGY                                                                                                                                                                                                                                   |
|                                 |                                                                                                                                                                                                                                                                                                                 |

SCHOLARONE™  
Manuscripts



1  
2  
3  
4  
5  
6  
7  
8  
9  
10  
11  
12  
13  
14  
15  
16  
17  
18  
19  
20  
21  
22  
23  
24  
25  
26  
27  
28  
29  
30  
31  
32  
33  
34  
35  
36  
37  
38  
39  
40  
41  
42  
43  
44  
45  
46  
47  
48  
49  
50  
51  
52  
53  
54  
55  
56  
57  
58  
59  
60

1 **ABSTRACT**

2 **Objectives:** Learning as measured by eyeblink classical conditioning is preserved in patients with  
3 idiopathic Parkinson's disease, but severely affected in patients with progressive supranuclear palsy.

4 We here sought to clarify whether procedural learning is impaired in multiple system atrophy, and  
5 whether it may be helpful for the differentiation of Parkinsonian syndromes.

6 **Design:** We investigated learning using (1) eyeblink classical conditioning with a delay  
7 (interstimulus interval 0 ms) and a trace (600 ms) paradigm and (2) a serial reaction time task.

8 **Setting:** Participants were recruited from academic research centers.

9 **Participants:** 11 patients with multiple system atrophy and 11 healthy controls.

10 **Results:** Implicit learning in eyeblink classical conditioning (acquisition of conditioned responses)  
11 as well as the serial reaction time task measures of implicit learning (reaction time change) are  
12 impaired in multiple system atrophy patients as compared to controls, whereas explicit learning as  
13 measured by the sequence recall of the serial reaction time task is relatively preserved.

14 **Analysis:** We hypothesize that the MSA patients' learning deficits are due to lesions of cerebellar  
15 and connected brainstem areas.

16 **Conclusions:** A retrospective synopsis of these novel data on multiple system atrophy patients and  
17 groups of idiopathic Parkinson's disease patients and progressive supranuclear palsy patients  
18 studied earlier suggests that eyeblink classical conditioning may contribute to the early  
19 differentiation of atypical Parkinson syndromes from idiopathic Parkinson's disease. This  
20 hypothesis should be tested in a prospective trial.

1  
2  
3  
4  
5  
6  
7  
8  
9  
10  
11  
12  
13  
14  
15  
16  
17  
18  
19  
20  
21  
22  
23  
24  
25  
26  
27  
28  
29  
30  
31  
32  
33  
34  
35  
36  
37  
38  
39  
40  
41  
42  
43  
44  
45  
46  
47  
48  
49  
50  
51  
52  
53  
54  
55  
56  
57  
58  
59  
60

1 **ARTICLE SUMMARY:**

2 **Article focus:**

- 3 • We tested if the non-motor feature of procedural learning is impaired in patients afflicted with  
4 multiple system atrophy.  
5 • We studied the eyeblink classical conditioning and a serial reaction time task in 11 MSA  
6 patients and matched control subjects.

7  
8 **Key messages:**

- 9 • Blink reflex pathways were intact, but eyeblink conditioning was significantly impaired in  
10 MSA patients. By contrast, the serial reaction time task was difficult and inconclusive in  
11 these patients due to motor constraints impairing finger tapping.  
12 • A retrospective comparison with previously studied groups patients with idiopathic  
13 Parkinson's disease or Progressive Supranuclear Palsy points to a putative role of eyeblink  
14 conditioning in distinguishing typical from atypical Parkinsonian disorders.

15  
16 **Strength and limitations:**

- 17 • The study differentiates feasible and non-feasible assessments of procedural learning in  
18 multiple system atrophy.  
19 • The comparison to other patient groups is clearly retrospective and needs to be validated by a  
20 prospective trial.  
21

## 1 INTRODUCTION

2 Multiple system atrophy (MSA) is a progressive neurodegenerative disorder characterized by an  
3 absent or poorly levodopa responsive Parkinsonism, cerebellar dysfunction and autonomic failure.<sup>1</sup>  
4 A predominantly Parkinsonian (MSA-P) and a cerebellar subtype (MSA-C) are recognized. Despite  
5 the development of consensus criteria,<sup>2</sup> the differential diagnosis between MSA and other  
6 hypokinetic rigid syndromes, such as idiopathic Parkinson's disease (IPD) or progressive  
7 supranuclear palsy (Steele-Richardson-Olszewski syndrome, PSP), remains a clinical challenge.<sup>3 4</sup>

8 Recent years have seen an increasing focus on non-motor symptoms such as cognitive deficits  
9 in Parkinsonian disorders. Different patterns of cognitive impairment including deficits in executive  
10 function and learning abilities have been described.<sup>5-9</sup>

11 A well established task to study associative, procedural learning<sup>10</sup> is eyeblink classical  
12 conditioning (EBCC), which some regard as a model of implicit learning.<sup>11</sup> Previous studies have  
13 shown that learning as measured by EBCC is normal in patients with IPD, but, severely affected in  
14 patients with PSP.<sup>12-14</sup> The serial reaction time task (SRTT) is another established task for which the  
15 implicit measures of motor skill (reaction time and errors) were close to normal in IPD patients, but  
16 impaired in PSP patients, whereas sequence recall as measure of explicit learning were largely  
17 preserved in both groups.<sup>12 14</sup> We sought to investigate whether implicit learning deficits are specific  
18 for PSP or present in MSA as well, thereby comparing the clinical feasibility of SRTT and of EBCC  
19 in this patient group.

## 21 METHODS

### 22 Subjects

23 11 MSA patients were recruited from the outpatient clinics in Munich and Göttingen between 1999  
24 and 2008 (**table 1**). The clinical diagnosis of "probable MSA" was established following consensus  
25 criteria.<sup>2</sup> 7 MSA patients were taking L-Dopa, two dopamine agonists (ropinirole, pramipexole),  
26 one amantadine, one budipine, one biperiden, another metixen, and two were taking antidepressants.

1 L-Dopa equivalent doses (LEDs) were calculated according to Tomlinson and colleagues<sup>15</sup> except  
 2 for budipine, biperiden and metixen, where no conversion factor was given.

3 To rule out an immediate impact of medication on the patients' memory performance, the anti-  
 4 parkinsonian medication was discontinued on the morning of the day of the study. MSA patients  
 5 were compared with 11 age matched healthy control subjects (mean age 59.5±10.0 years, 6 male, 5  
 6 female), of which a subgroup was already involved in our earlier published study (numbers  
 7 2,3,5,6,8,9,11,12,14 according to Table 2 in<sup>12</sup>). All participants gave written informed consent; the  
 8 research protocol was approved by the local ethics committee. Neither the patients nor the control  
 9 subjects had any sign of cranial nerve impairment or auditory deficits in routine neurological  
 10 examination.

Table 1

| Pat<br>Nr. | MSA<br>Type | Age<br>[year] | Sex | Duratio<br>n<br>[year] | L-Dopa<br>response | LED<br>[mg]      | UPDRS<br>Max=108 | Cerebellar<br>Max=4 | Autonomic<br>Max=5[f], 6[m] | Pyramida<br> <br>Max=2 | Hamilton<br>Max=69 | MMS<br>Max=30 |
|------------|-------------|---------------|-----|------------------------|--------------------|------------------|------------------|---------------------|-----------------------------|------------------------|--------------------|---------------|
| 1          | P           | 66            | F   | 9                      | Poor               | 0 <sup>+</sup>   | 50               | 0                   | 1                           | 0                      | 11                 | 27            |
| 2          | P           | 69            | M   | 4.5                    | Poor               | 125              | 20               | 0                   | 2                           | 0                      | 20                 | 30            |
| 3          | P           | 73            | M   | 8                      | Absent             | 255              | 16               | 0                   | 3                           | 0                      | 15                 | 28            |
| 4          | P           | 59            | F   | 1.5                    | Poor               | 125 <sup>#</sup> | 30               | 0                   | 2                           | 1                      | 16                 | 26            |
| 5          | P           | 71            | M   | 4                      | Absent             | 150              | 35               | 0                   | 4                           | 0                      | 6                  | 29            |
| 6          | P           | 75            | M   | 5                      | Modest             | 524              | 38               | 0                   | 3                           | 0                      | 6                  | 29            |
| 7          | P           | 75            | F   | 3                      | Poor               | 375              | 40               | 0                   | 3                           | 0                      | 10                 | 28            |
| 8          | P           | 58            | M   | 3                      | Poor               | 105 <sup>#</sup> | 18               | 0                   | 1                           | 0                      | 2                  | 30            |
| 9          | C           | 64            | M   | 2                      | Poor               | 900              | 69               | 2                   | 2                           | 0                      | 22                 | 27            |
| 10         | C           | 56            | M   | 2.5                    | *                  | 0                | 5                | 3                   | 1                           | 0                      | 16                 | 28            |
| 11         | C           | 60            | F   | 8                      | *                  | 0                | 30               | 3                   | 3                           | 1                      | 14                 | 26            |
| Mean       |             | 66.0          |     | 4.6                    |                    |                  | 31.9             | 0.7                 | 2.3                         | 0.2                    | 12.5               | 28.0          |
| S.D.       |             | 7.1           |     | 2.6                    |                    |                  | 17.7             | 1.3                 | 1.0                         | 0.4                    | 6.2                | 1.4           |

11

## 12 Clinical testing procedures

13 The Hamilton rating scale for depression<sup>16</sup> and the Mini-Mental state examination<sup>17</sup> were used to  
 14 quantify the affective and general cognitive status, respectively, with pragmatic and established  
 15 tests. Motor features in patients were evaluated with the Unified Parkinson Disease Rating Scale  
 16 (UPDRS, part III).<sup>18</sup> Further clinical assessments are listed in table 1.

1 To investigate eyeblink function we used the blink reflex (BR) and its R2 recovery cycle  
2 detailed elsewhere.<sup>12 19 20</sup> In brief, a single electrical stimulation of the supraorbital nerve (duration:  
3 0.2 ms) elicits an early unilateral (R1) and a late bilateral (R2) blink response. Paired-pulse  
4 supraorbital stimulation probes brainstem interneuronal excitability and yields an inhibition of the  
5 R2 of the second stimulus. We used interstimulus intervals (ISIs) of 100 ms, 300 ms and 600 ms on  
6 both sides. For EBCC we stimulated the side in which amplitudes and latencies were within or close  
7 to the normal range or arbitrarily the right supraorbital nerve if no side-differences were found.

### 9 **EBCC-implicit learning**

10 The procedures were virtually identical to and detailed in the earlier studies from our group.<sup>12 14</sup> In  
11 brief, an unconditioned stimulus, i.e. an electric pulse over the supraorbital nerve, invariably  
12 induces an eyeblink reflex. It is paired with a preceding conditioned stimulus, i.e. a tone, which by  
13 itself may elicit early startle responses (so called alpha blinks, within 200 ms after the tone). With  
14 repeated presentation of the tone and the electric pulse, a conditioned eyeblink response is expected  
15 to occur before the onset of the electrical stimulus. In the current study, the tone (conditioned  
16 stimulus, CS, 400 ms duration) was generated by a custom built sound generator (Department of  
17 Electronic Engineering, University of Goettingen) and presented via earphones (Cherry Inc., Japan)  
18 at an intensity perceived as very loud by each subject, usually 80 dB. A brief electrical stimulus to  
19 the supraorbital nerve eliciting a blink reflex served as unconditioned stimulus (UCS). We tested the  
20 EBCC with a two different interstimulus intervals between the end of the tone and the beginning of  
21 the electric pulse, either ISI 0 ms (delay paradigm) or 600 ms (trace paradigm), in randomized order.  
22 For each paradigm we administered six learning blocks with CS and UCS in trials 1-9, UCS only in  
23 trial 10 (to control for random blinks) and CS only in trial 11 (to test for an independent learning  
24 effect). To control for extinction of learned responses a seventh block consisted of 11 trials with CS  
25 only.<sup>21</sup> The intertrial interval was randomized between 10 and 30 seconds.

1 Electromyographic (EMG) activity was recorded using silver-silverchloride cup electrodes  
2 fixed with adhesive tape over the lower eyelid and over the ipsilateral temple.<sup>12 14</sup> EMG signals  
3 were fed into a recording device and filtered at 100 Hz and 5 kHz (SynAmps, Neuroscan Inc,  
4 Virginia, USA). To detect any ongoing muscular activity we recorded 400 ms before and 1600 ms  
5 after CS onset.

### 6 7 **Serial reaction time task (SRTT)**

8 The SRTT is established as a test of implicit learning.<sup>12 23</sup> Subjects were sitting in front of a  
9 computer screen, and were told that single asterisks would appear in one out of four positions on a  
10 computer screen. They were instructed to press a marked key on a computer keyboard that was  
11 underneath the position of the asterisk on the screen. The asterisks were presented in three random  
12 blocks (blocks 1, 2, 7) and four identical sequence blocks (blocks 3-6), in each of which a sequence  
13 of 10 elements (CBDABDCBA) was presented 10 times. After each block subjects were asked to  
14 repeat the last 10 asterisk positions manually on the computer keyboard. We analyzed reaction time,  
15 errors and number of correctly repeated parts of the sequence. This test was difficult for many  
16 patients: Only 6 patients completed the test as required, one patient discontinued after block 1 and  
17 was excluded from the analysis. Two others discontinued after block 4, one after block 3. To enable  
18 some kind of statistical analysis, the result that these patients reached in their last sequence block  
19 was carried forward to the following sequence blocks, and the result of the second random block  
20 was assumed for block 7. One patient apparently responded with random typing to the letters  
21 presented and was therefore excluded from the analysis.

### 22 23 **Comparison of MSA patients with PSP and IPD patients studied earlier**

24 While clearly retrospective, we have taken the liberty to compare the MSA patients results obtained  
25 here with the group of PSP patients that we studied in 2001<sup>14</sup> and a subgroup of IPD patients  
26 studied in 1999 with identical methods (numbers 1-4 and 6-11 according to Table 1 in<sup>12</sup>, selected to



1 match the current MSA group with regard to the disease severity according to UPDRS part III).  
 2 Demographical data are cited in table 2. In figure 1, 2 and 4, data from these IPD and PSP patients  
 3 are given in dashed lines.

Table 2

| Nr.  | group | Age    |     | Dura-<br>tion<br>[year] | UPDRS<br>Max=108 | BDI<br>Max=63 | MMS<br>Max=30 | MDRS<br>Max=144 |
|------|-------|--------|-----|-------------------------|------------------|---------------|---------------|-----------------|
|      |       | [year] | Sex |                         |                  |               |               |                 |
| 1    | C     | 57     | m   | -                       | -                | 2             |               | 144             |
| 2    | C     | 60     | f   | -                       | -                | 9             |               | 142             |
| 3    | C     | 50     | m   | -                       | -                | 0             |               | 141             |
| 4    | C     | 64     | f   | -                       | -                | 0             |               | 142             |
| 5    | C     | 58     | m   | -                       | -                | 1             |               | 138             |
| 6    | C     | 73     | m   | -                       | -                | 6             |               | 134             |
| 7    | C     | 49     | f   | -                       | -                | 0             |               | 143             |
| 8    | C     | 45     | m   | -                       | -                | 1             |               | 144             |
| 9    | C     | 53     | m   | -                       | -                | 1             |               | 142             |
| 10   | C     | 73     | f   | -                       | -                | 11            | 30            |                 |
| 11   | C     | 72     | f   | -                       | -                | 0             | 30            |                 |
| Mean |       | 59.5   |     |                         |                  | 2.6           |               |                 |
| S.D. |       | 10.0   |     |                         |                  | 3.6           |               |                 |
| 1    | IPD   | 69     | f   | 2                       | 45               | 11            |               | 138             |
| 2    | IPD   | 64     | f   | 6                       | 39               | 15            |               | 143             |
| 3    | IPD   | 62     | m   | 5                       | 21               | 9             |               | 132             |
| 4    | IPD   | 45     | m   | 6                       | 28               | 5             |               | 141             |
| 5    | IPD   | 47     | m   | 7                       | 31               | 6             |               | 139             |
| 6    | IPD   | 49     | m   | 7                       | 25               | 6             |               | 140             |
| 7    | IPD   | 64     | m   | 9                       | 47               | 11            |               | 135             |
| 8    | IPD   | 63     | m   | 8                       | 16               | 11            |               | 141             |
| 9    | IPD   | 61     | m   | 5                       | 33               | 8             |               | 143             |
| 10   | IPD   | 50     | m   | 3                       | 44               | 11            |               | 143             |
| Mean |       | 57.4   |     | 5.8                     | 32.9             | 9.3           |               | 139.5           |
| S.D. |       | 8.7    |     | 2.1                     | 10.7             | 3.1           |               | 3.7             |
| 1    | PSP   | 54     | m   | 2                       | 22               | 6             | 30            | 127             |
| 2    | PSP   | 69     | m   | 9                       | 34               | 0             | 28            | 110             |
| 3    | PSP   | 65     | f   | 2                       | 44               | 13            | 28            | 107             |
| 4    | PSP   | 57     | f   | 3                       | 30               | 35            | 30            | 135             |
| 5    | PSP   | 66     | m   | 2                       | 30               | 13            | 28            | 135             |
| 6    | PSP   | 59     | m   | 6                       | 50               | 4             | 22            | 100             |
| 7    | PSP   | 68     | f   | 4                       | 43               | 50            | 18            | 116             |
| 8    | PSP   | 63     | m   | 5                       | 54               | *             | 23            | 112             |
| Mean |       | 62.6   |     | 4.1                     | 38.4             | 17.3          | 25.9          | 117.8           |
| S.D. |       | 5.4    |     | 2.5                     | 11.1             | 18.4          | 4.4           | 13.1            |

## 5 Data analysis

6 R2 latencies were measured off-line. For analysis of the blink reflex recovery cycle, we entered the  
 7 R2 amplitudes of the second pulse normalized to the R2 amplitudes of the first pulse into a repeated  
 8 measures analysis of variance (ANOVA) with “interstimulus interval” (100; 300, 600 ms) as within

1 subject factor and “group” (control and MSA; or control, MSA, IPD, PSP) as between subject  
2 factor.<sup>12 19 20</sup> In the EBCC, EMG bursts were regarded as alpha-blinks, i.e. startle responses, or  
3 conditioned responses (CRs) if they occurred within the appropriate time window (alpha blinks:  
4 within 200ms after onset of tone (CS); CRs: within 200 ms before electrical stimulus (UCS)) and if  
5 their amplitude exceeded the baseline noise by at least 1.5 fold and reached at least 50  $\mu$ V. For the  
6 tone-alone-trials we extended the time window until 300 ms after the end of the UCS to detect  
7 delayed CRs.<sup>22</sup> We analyzed the percentage of conditioned eyeblink responses and of alpha blinks  
8 with separate repeated measures ANOVAs with “block” (blocks 1-6, CS only block) as within  
9 subject factor and “group” (control and MSA; or control, MSA, IPD, PSP) and “paradigm” (delay  
10 versus trace) as between subject factors. In addition, we repeated the ANOVAs for conditioned  
11 eyeblink responses with the individual average alpha blink rate across all seven blocks as covariate.

12 For SRTT, we analyzed reaction time, accuracy errors and retrieval using separate repeated  
13 measures ANOVAs with “block” (blocks 1-7) as within subject factor and “group” (control and  
14 MSA; or control, MSA, IPD, PSP) as between subject factor. In all analyses, Mauchly’s sphericity  
15 test was performed and Greenhouse–Geisser correction was applied when necessary. The level of  
16 significance was set at  $p < 0.05$ . Post-hoc t-tests were Bonferroni-corrected. A correlation between  
17 two parameters was determined by calculating Pearson’s correlation coefficient and was reported if  
18 it was higher than 0.75 or lower than -0.75. The results are given as mean values  $\pm$  one standard  
19 deviation.

## 21 RESULTS

### 22 Rating scales

23 Details of age, sex, disease duration, L-Dopa response and rating scales of MSA patients are  
24 displayed in **table 1**. UPDRS scores for motor impairment placed the patients in an intermediately  
25 impaired range. The Hamilton depression score revealed mild depressive symptoms (mean  $12.5 \pm 6.2$   
26 out of 69 points) and the Mini-Mental State scored between 26 and 30 points (mean  $28.0 \pm 1.4$ )

1 indicating mild cognitive impairment in more than half of the patients. These results are comparable  
2 to the IPD and PSP groups reported earlier.<sup>12 14</sup>

#### 4 **Blink reflex pathways**

5 Blink reflex responses in MSA patients showed normal latencies (ipsilateral R1: 11.6±1.0 ms,  
6 ipsilateral R2: 31.5±4.9 ms contralateral R2: 34.4±4.1 ms). An R2 recovery cycle could be obtained  
7 in all patients (**figure 1**) with no significant side difference between the ipsi- and contralateral R2  
8 recovery. MSA patients showed significantly less R2 inhibition compared to the control group  
9 (repeated-measures ANOVA MSA-controls, effect of group,  $F(1, 20)= 15.0$ ,  $p=0.001$ ).

11 -- Please insert fig. 1 about here --

#### 13 **Conditioned eyeblink responses**

14 All MSA patients showed few random blinks as assessed by the UCS only trials (3.0±6.7 % across  
15 both paradigms). The conditioned responses (CRs) were first analyzed for block 1-6 excluding the  
16 tone alone trials (see below). In either paradigm MSA patients showed significantly fewer CRs than  
17 the control group (**figure 2**; repeated-measures ANOVA MSA-control, effect of group,  $F(1, 39)=$   
18  $37.1$ ,  $p<0.0001$ ; effect of block,  $F(3.4, 39)= 7.0$ ,  $p<0.0001$ ; interaction of group by block,  $F(3.4,$   
19  $266)= 3.325$ ,  $p=0.017$ , no main effect of paradigm). Adding the rate of alpha blinks as covariate to  
20 the ANOVA did not abolish the effect of group ( $F(1, 38)= 31.5$ ,  $p<0.0001$ ). These results were  
21 supported by a separate analysis of the tone alone trials (trial 11, block 1-6), in which the MSA  
22 group yielded an average number of CRs of 14±17 % in the delay and 12±17 % in the trace  
23 paradigm, which was significantly less than the control group with 73±23 % and 55±27 % of CRs  
24 respectively (ANOVA MSA-control, effect of group,  $F(1,37)=59.1$ ,  $p<0.0001$ ). There was again no  
25 main effect of paradigm, i.e. trace and delay paradigm did not differ from each other.

1  
2 1 Considering the MSA patients only, there was no difference in the occurrence of CRs between  
3  
4 2 MSA-P and MSA-C patients (ANOVA, effect of MSA subtype,  $F(1,17)=2.5$ ,  $p=0.13$ ).

5  
6 3  
7  
8 4 -- Please insert fig. 2 about here -  
9  
10 5

### 6 **Alpha Blinks**

7 In either paradigm MSA patients tended to show less alpha blinks than controls (repeated measures  
8 ANOVA, effect of group  $F(1,38)=4.0$ ,  $p=0.054$ ; **figure 3**). The mean percentage of alpha blinks  
9 across all blocks in MSA patients was  $17.6\pm 4.6\%$  in the delay and  $14.4\pm 4.1\%$  in the trace  
10 paradigm, for control subjects  $31.5\pm 11.1\%$  and  $35.2\pm 11.3\%$  respectively. There were significantly  
11 more alpha blinks in earlier blocks than in late blocks for both paradigms (effect of block,  $F(4.3,$   
12  $163.7)=8.5$ ,  $p<0.0001$ ). Considering the MSA patients only, there was no statistically significant  
13 difference in the occurrence of alpha blinks between MSA-P and MSA-C patients (~~repeated~~  
14 ~~measures ANOVA, effect of MSA subtype  $F(1,17)=1.5$ ,  $p=0.23$~~ ).

15  
16 16 -- Please insert fig. 3 about here --  
17  
18

### 18 **Serial reaction time task (SRTT)**

#### 19 **Reaction time**

20 MSA patients showed longer reaction times compared with controls (repeated measures ANOVA  
21 MSA-control, effect of group,  $F(1,18)=20.2$ ,  $p<0.0001$ ; and a trend for an interaction of group by  
22 block,  $F(1.52, 27.34)=2.77$ ,  $p=0.10$ , **figure 4A**). In both groups reaction times decreased from block  
23 1 to the sequence blocks 3, 4, 5 and 6 (effect of block,  $F(1.52, 27.34)=5.5$ ,  $p=0.016$ ). The reaction  
24 time increase from sequence block 6 to random block 7, which is considered ~~being~~ a measure of  
25 implicit learning, was significant in the control group only (t-test  $p<0.01$ ; MSA  $p=0.1$ ).

-- Please insert fig. 4 about here --

### ***Accuracy errors***

The average error rate of MSA patients across blocks was  $19.7 \pm 4.2$  %, which is significantly higher compared to controls with a rate of  $2.6 \pm 0.8$  % (repeated measures ANOVA MSA-control, effect of group,  $F(1,18)=10.1$ ,  $p=0.005$ ). In both groups error rates decreased from the first random to the sequence blocks (effect of block,  $F(3.37, 42.66)=3.9$ ,  $p=0.022$ ) and tended to increase between the last sequence block and the random block 7 without being significant.

### ***Retrieval of sequence***

There was no significant difference between MSA patients and controls in the measures of sequence detection (manual sequence retrieval, ANOVA MSA-control, effect of group,  $F(1,18)=0.7$ ,  $p=0.42$ ). Both groups detected an increasing amount of the sequence during the course of the experiment (ANOVA, effect of block,  $F(3.58, 64.48)=31.0$ ,  $p<0.001$ ). A small percentage of repetition was seen even before the sequence was presented, which indicates the baseline guessing rate (**figure 4B**).

### ***Correlation analyses for MSA patients***

We did not find a significant correlation between the average number of CRs across block 3-6 (steady state) and the duration of disease, the Hamilton scale score, the MMST, the motor examination of the UPDRS, the cerebellar or autonomic impairment as assessed by the scores (see table 1) for either paradigm. The percentage of manual retrieval in the SRTT did not correlate with any of these parameters either.

## 1 Retrospective comparison of all patient groups (MSA, PSP, IPD) and the control group

2 In the blink reflex recovery cycle, the R2 inhibition was not different between the patient groups  
3 (figure 1). For the EBCC paradigms, the lack of eyeblink conditioning in MSA patients was similar  
4 to the PSP group and differed significantly from the increasing occurrence of CRs in IPD patients  
5 and controls (ANOVA, effect of group,  $F(3,63)=23.2$ ,  $p<0.0001$ ; interaction of group by block,  
6  $F(11.1, 233.0)=3.6$ ,  $p<0.0001$ , post-hoc t-test with Bonferroni correction; figure 2). Adding the rate  
7 of alpha blinks as covariate did not abolish the effect of group ( $F(1, 32)= 16.7$ ,  $p<0.0001$ ). Also in  
8 the tone alone trials, MSA and PSP patients showed fewer CRs than the IPD and control groups  
9 (ANOVA, effect of group,  $F(3,64)=19.0$ ,  $p<0.0001$ ; interaction of group by block,  $F(15,320)=1.8$ ,  
10  $p=0.04$ ). MSA and PSP groups both showed fewer alpha blinks than IPD patients and controls  
11 (ANOVA, effect of group,  $F(3,61)=3.5$ ,  $p=0.02$ ; interaction of group by block ( $F(12.73, 259.0)=2.0$ ,  
12  $p=0.025$ ; see figure 3). However, the post-hoc t-test analysis indicated these differences to be non-  
13 significant.

14 For the differentiation of MSA and PSP from IPD we considered the mean percentage of CRs  
15 in the steady state part of the EBCC learning curve (blocks 3-6). The mean percentage of CRs  
16 allows a non-overlapping separation of the MSA and PSP groups from IPD in the trace paradigm  
17 with a cutoff at 26% (**figure 5**). In the delay paradigm, the separation between groups was less  
18 complete. Whereas all PSP patients exhibited less than 26% of CRs, the fraction of MSA patients  
19 with values equal or below 26% was 0.91. This corresponds to sensitivity values for the separation  
20 of PSP and MSA from IPD of 100% and 91%, respectively. If the specificity is defined as the  
21 fraction of IPD patients with CRs values above 26%, the specificity in the delay paradigm is 75%.  
22 As reported above, the sensitivity and specificity values for the trace paradigm are 100%. The  
23 slightly better performance of IPD patients<sup>13</sup> as compared to controls was not significant.

24  
25 -- Please insert fig. 5 about here --  
26

1 In the SRTT, MSA patients showed significantly longer reaction times than the IPD patients,  
2 but no significant difference compared to the PSP group (ANOVA: effect of group  $F(3,30)=7.4$ ,  
3  $p=0.001$ ; see figure 4). With regard to the error rate, MSA patients performed again very similar to  
4 the PSP patients, who showed  $19.5\pm 1.8\%$  accuracy errors, but significantly worse than the IPD  
5 patients (error rate  $4.8\pm 1.7\%$ ; ANOVA, effect of group,  $F(3,32)=6.1$ ,  $p=0.002$ ). The sequence recall  
6 measurements revealed no statistically significant differences between groups.

## 7 8 **DISCUSSION**

9 The differentiation of IPD and atypical Parkinsonian syndromes (MSA, PSP) constitutes a challenge  
10 for neurologists, as the motor symptoms often present very similarly, in particular in the early  
11 stages. Additional markers such as imaging have been evaluated,<sup>24 25</sup> but these provide still  
12 insufficient sensitivity values or are technically challenging. In addition, macroscopically  
13 discernible structural changes as detectable by MRI are likely to occur some time after functional  
14 loss has begun. Therefore functional tests might be better suited because they reveal deficits before  
15 discernible structural changes occur. In this study we focus on the differential learning abilities tested  
16 by eyeblink conditioning (EBCC) and a serial reaction time task (SRTT). First, the results of the  
17 MSA patients will be discussed, followed by a comparison with PSP and the putative impact for  
18 differentiation from IPD.

19 The MSA patients showed severely impaired implicit learning in the trace as well as in the  
20 delay eyeblink conditioning paradigm, with standard deviations in the range of other studies,<sup>10 26</sup>  
21 whereas non-learning associated blink reflex latencies as indicators of oculomotor pathways were  
22 normal.

23 Histopathological alterations in both subtypes of MSA include the substantia nigra, putamen,  
24 descending and ascending fiber tracts of the motor system, olivary and pontine nuclei, brainstem-  
25 cerebellar circuits as well as cerebellar structures (hemispheres and vermis).<sup>27-29</sup> This has been  
26 confirmed *in vivo* by diffusion tensor imaging of white matter microstructure.<sup>30</sup> We suggest that

1 damage of cerebellar structures and associated brainstem-cerebellar circuits are responsible for the  
2 failure of EBCC learning in MSA patients. This assumption is supported by the findings of impaired  
3 EBCC in patients with cerebellar damage,<sup>22 31-33</sup> positron-emission tomography (PET)  
4 measurements in healthy humans showing changes in glucose metabolism in the cerebellum and  
5 pons during EBCC<sup>21 34</sup> as well as in experiments studying the influence of selective  
6 pharmacological blockade of cerebellar input on EBCC in rabbits.<sup>35</sup> Most patients in our study were  
7 clinically characterized as MSA-P and not MSA-C. However, the failure in blink reflex acquisition  
8 in both groups points to a subclinical cerebellar involvement in MSA-P, which is in accordance  
9 with the histopathological studies.<sup>28 29</sup> EBCC therefore seems to detect cerebellar involvement at a  
10 subclinical stage.

11 In addition to the cerebellum, several studies indicate that acquisition of CR in the trace  
12 paradigm depends on forebrain areas such as the hippocampus or prefrontal cortex, in particular for  
13 longer interstimulus intervals.<sup>36 37</sup> In our study, the failure of CR acquisition in MSA patients was  
14 slightly more pronounced in the trace compared to the delay paradigm. Therefore, lesions of the  
15 frontal lobe, which have been suggested by neuropsychological testing<sup>6 38</sup> and confirmed  
16 histopathologically in a variety of MSA cases,<sup>39 40</sup> may have contributed to impaired EBCC  
17 acquisition in the trace paradigm.

18 An alternative explanation that was brought up by an anonymous reviewer is that the tone may  
19 be a less salient CS to the MSA patients than to the control group. The reduced number of alpha  
20 blinks would support this assumption. Following that very elegant line of thought, the EBCC group  
21 difference between MSA patients and control subjects would have to do less with implicit learning  
22 and more with responsiveness and associative processes related to external stimuli. While this may  
23 have some relevance, adding the number of alpha blinks to the ANOVAs on conditioned eyeblink  
24 responses did not abolish the between-group differences.

25 In the SRTT the MSA patients showed severe impairment in terms of prolonged reaction time,  
26 high error rate and, in some patients, early discontinuation due to fatigue and exhaustion. In contrast



1 to the control group they showed no significant reaction time increase between block 6 (random)  
2 and 7 (sequence) and this is indicative of implicit learning deficits. On the other hand they showed  
3 good performance on the parameters of sequence recall (explicit learning). This preservation of  
4 SRTT explicit learning parts may be explained by the relative preservation of posterior association  
5 (temporal and parietal) cortex and hippocampus in MSA. However, the validity of the SRTT  
6 learning results is limited by the discontinuation of patients and our “last observation carried  
7 forward approach” (see Methods). In addition, the patients’ motor impairment, which may interfere  
8 with the motor part of the task, and the fact that sequence learning and movement preparation seem  
9 to share similar attentional and working memory resources<sup>41</sup> have to be considered. Therefore the  
10 SRTT seems to be inappropriate to assess learning abilities in MSA patients. This is in contrast to  
11 the EBCC, which is independent of the motor performance of patients. Furthermore, EBCC circuits  
12 are located anatomically closer to the affected brainstem regions.

13 With all the limitations of such a retrospective comparison of data acquired in different patient  
14 groups by the same authors, the implicit learning impairment in MSA patients as clearly revealed by  
15 the EBCC and with some limitation by the SRTT parallels the previously reported findings in PSP  
16 patients.<sup>14</sup> Interestingly, MSA and PSP are characterized by different histopathological alterations,  
17  $\alpha$ -synuclein positive inclusions versus tau-positive aggregations, which lead to presume different  
18 pathophysiological mechanisms. However, the common involvement of cerebellar structures in both  
19 diseases<sup>27 42</sup> seems to be responsible for the clinical phenomenology independent of the cellular  
20 mechanism.

21 In contrast to MSA and PSP, IPD patients show normal<sup>12</sup> or even enhanced<sup>13</sup> acquisition of  
22 conditioned responses in EBCC. EBCC may therefore contribute to distinguish IPD from these  
23 atypical Parkinsonian syndromes. As the development of cerebellar and related neuropathology in  
24 MSA or PSP often occurs prior to or even without clinical manifestation,<sup>29 42</sup> we propose impaired  
25 EBCC particularly in the trace paradigm as an early indicator of neurodegeneration of areas beyond  
26 those typically affected in IPD. However, as the retrospective synopsis is clearly limited, the pivotal

1 questions of whether EBCC can serve as predictor for the development of typical or atypical disease  
2 and whether EBCC is a useful addition to imaging techniques in establishing an early differential  
3 diagnosis are unanswered yet and require further prospective investigation.

4

For peer review only

1  
2  
3  
4  
5  
6  
7  
8  
9  
10  
11  
12  
13  
14  
15  
16  
17  
18  
19  
20  
21  
22  
23  
24  
25  
26  
27  
28  
29  
30  
31  
32  
33  
34  
35  
36  
37  
38  
39  
40  
41  
42  
43  
44  
45  
46  
47  
48  
49  
50  
51  
52  
53  
54  
55  
56  
57  
58  
59  
60

## 1 Acknowledgements

2 We thank Prof. Mark Hallett for commenting on an earlier draft of the manuscript.

## 4 Funding

5 This work was supported by the Deutsche Forschungsgemeinschaft (DFG, grant SO 429/2-2  
6 (M.S.)), by the Bernstein Center for Computational Neuroscience (grant # 01GQ0432 (W.P.)) and  
7 by the University of Göttingen (Heidenreich von Siebold-Programm (F.v.L.)).

## 9 Contributors

10 All authors listed above fulfill all three International Committee of Medical Journal Editors  
11 (ICMJE) guidelines for authorship which are (1) substantial contributions to conception and design,  
12 acquisition of data or analysis and interpretation of data; (2) drafting the article or revising it  
13 critically for important intellectual content and (3) final approval of the version to be published.  
14 MSo, CT and WP conceived the study. MSch, FvL and MSo were responsible for obtaining the  
15 data. FvL and MSo conducted the data analysis. All authors contributed to decisions on the  
16 interpretation of results. FvL and MSo contributed to the drafting of the manuscript. CT and WP  
17 were responsible for editing and providing guidance on the paper. All authors were responsible for  
18 critically revising the paper. All authors approved the final version of the manuscript prior to  
19 submission.

20  
21 **Competing interests** None

22  
23 **Ethics approval** Ethics committee of the Medical Faculty of the University of Goettingen.

24  
25 **Data sharing statement** There are no additional data available.

1  
2  
3  
4  
5  
6  
7  
8  
9  
10  
11  
12  
13  
14  
15  
16  
17  
18  
19  
20  
21  
22  
23  
24  
25  
26  
27  
28  
29  
30  
31  
32  
33  
34  
35  
36  
37  
38  
39  
40  
41  
42  
43  
44  
45  
46  
47  
48  
49  
50  
51  
52  
53  
54  
55  
56  
57  
58  
59  
60  
1 REFERENCES

- 2 1. Kollensperger M, Geser F, Ndayisaba JP, Boesch S, Seppi K, Ostergaard K, et al.  
3 Presentation, diagnosis, and management of multiple system atrophy in  
4 Europe: final analysis of the European multiple system atrophy registry. *Mov*  
5 *Disord* 2010;25(15):2604-12.
- 6 2. Gilman S, Wenning GK, Low PA, Brooks DJ, Mathias CJ, Trojanowski JQ, et al.  
7 Second consensus statement on the diagnosis of multiple system atrophy.  
8 *Neurology* 2008;71(9):670-6.
- 9 3. Poewe W, Wenning G. The differential diagnosis of Parkinson's disease. *Eur J*  
10 *Neurol* 2002;9 Suppl 3:23-30.
- 11 4. Hughes AJ, Daniel SE, Ben-Shlomo Y, Lees AJ. The accuracy of diagnosis of  
12 parkinsonian syndromes in a specialist movement disorder service. *Brain*  
13 2002;125(Pt 4):861-70.
- 14 5. Lange KW, Tucha O, Alders GL, Preier M, Csoti I, Merz B, et al. Differentiation  
15 of parkinsonian syndromes according to differences in executive functions. *J*  
16 *Neural Transm* 2003;110(9):983-95.
- 17 6. Burk K, Daum I, Rub U. Cognitive function in multiple system atrophy of the  
18 cerebellar type. *Mov Disord* 2006;21(6):772-6.
- 19 7. Robbins TW, James M, Owen AM, Lange KW, Lees AJ, Leigh PN, et al.  
20 Cognitive deficits in progressive supranuclear palsy, Parkinson's disease, and  
21 multiple system atrophy in tests sensitive to frontal lobe dysfunction. *J Neurol*  
22 *Neurosurg Psychiatry* 1994;57(1):79-88.
- 23 8. Kehagia AA, Barker RA, Robbins TW. Neuropsychological and clinical  
24 heterogeneity of cognitive impairment and dementia in patients with  
25 Parkinson's disease. *Lancet Neurol* 2010;9(12):1200-13.
- 26 9. Balas M, Balash Y, Giladi N, Gurevich T. Cognition in multiple system atrophy:  
27 neuropsychological profile and interaction with mood. *J Neural Transm*  
28 2010;117(3):369-75.
- 29 10. Hoffland BS, Kassavetis P, Bologna M, Teo JT, Bhatia KP, Rothwell JC, et al.  
30 Cerebellum-dependent associative learning deficits in primary dystonia are  
31 normalized by rTMS and practice. *Eur J Neurosci* 2013;2013(31):1-6.
- 32 11. Christian KM, Thompson RF. Neural substrates of eyeblink conditioning:  
33 acquisition and retention. *Learn Mem* 2003;10(6):427-55.
- 34 12. Sommer M, Grafman J, Clark K, Hallett M. Learning in Parkinson's disease:  
35 eyeblink conditioning, declarative learning, and procedural learning. *J Neurol*  
36 *Neurosurg Psychiatry* 1999;67(1):27-34.
- 37 13. Daum I, Schugens MM, Breitenstein C, Topka H, Spieker S. Classical eyeblink  
38 conditioning in Parkinson's disease. *Mov Disord* 1996;11(6):639-46.
- 39 14. Sommer M, Grafman J, Litvan I, Hallett M. Impairment of eyeblink classical  
40 conditioning in progressive supranuclear palsy. *Mov Disord* 2001;16(2):240-  
41 51.

15. Tomlinson CL, Stowe R, Patel S, Rick C, Gray R, Clarke CE. Systematic review of levodopa dose equivalency reporting in Parkinson's disease. *Mov Disord* 2010;25(15):2649-53.
16. Hamilton M. A rating scale for depression. *J Neurol Neurosurg Psychiatry* 1960;23:56-62.
17. Folstein MF, Folstein SE, McHugh PR. "Mini-mental state". A practical method for grading the cognitive state of patients for the clinician. *J Psychiatr Res* 1975;12(3):189-98.
18. Fahn S, Elton R, Committee amotUD. *Recent developments in Parkinson's disease*. Florham Park, NJ: Macmillan Healthcare Information, 1987.
19. Sommer M, Wobker G, Ferbert A. Voluntary eyelid contraction modifies the blink reflex recovery cycle. *Acta Neurol Scand* 1998;98(1):29-35.
20. Kimura J. The blink reflex. In: Kimura J, editor. *Electrodiagnosis in diseases of nerve and muscle: principles and practice*. Philadelphia: Davis, F. A., 1989:307-331.
21. Molchan SE, Sunderland T, McIntosh AR, Herscovitch P, Schreurs BG. A functional anatomical study of associative learning in humans. *Proc Natl Acad Sci U S A* 1994;91(17):8122-6.
22. Topka H, Valls-Sole J, Massaquoi SG, Hallett M. Deficit in classical conditioning in patients with cerebellar degeneration. *Brain* 1993;116 ( Pt 4):961-9.
23. Pascual-Leone A, Grafman J, Clark K, Stewart M, Massaquoi S, Lou JS, et al. Procedural learning in Parkinson's disease and cerebellar degeneration. *Ann Neurol* 1993;34(4):594-602.
24. Mahlknecht P, Hotter A, Hussl A, Esterhammer R, Schocke M, Seppi K. Significance of MRI in diagnosis and differential diagnosis of Parkinson's disease. *Neurodegener Dis* 2010;7(5):300-18.
25. von Lewinski F, Werner C, Jorn T, Mohr A, Sixel-Doring F, Trenkwalder C. T2\*-weighted MRI in diagnosis of multiple system atrophy. A practical approach for clinicians. *J Neurol* 2007;254(9):1184-8.
26. Holloway JL, Trivedi P, Myers CE, Servatius RJ. Enhanced conditioned eyeblink response acquisition and proactive interference in anxiety vulnerable individuals. *Front Behav Neurosci* 2012;6(76).
27. Braak H, Rub U, Del Tredici K. Involvement of precerebellar nuclei in multiple system atrophy. *Neuropathol Appl Neurobiol* 2003;29(1):60-76.
28. Wenning GK, Tison F, Elliott L, Quinn NP, Daniel SE. Olivopontocerebellar pathology in multiple system atrophy. *Mov Disord* 1996;11(2):157-62.
29. Ozawa T, Paviour D, Quinn NP, Josephs KA, Sangha H, Kilford L, et al. The spectrum of pathological involvement of the striatonigral and olivopontocerebellar systems in multiple system atrophy: clinicopathological correlations. *Brain* 2004;127(Pt 12):2657-71.
30. Nair SR, Tan LK, Mohd Ramli N, Lim SY, Rahmat K, Mohd Nor H. A decision tree for differentiating multiple system atrophy from Parkinson's disease using 3-T MR imaging. *Eur Radiol* 2013;10.

- 1 31. Gerwig M, Dimitrova A, Kolb FP, Maschke M, Brol B, Kunnel A, et al.  
2 Comparison of eyeblink conditioning in patients with superior and posterior  
3 inferior cerebellar lesions. *Brain* 2003;126(Pt 1):71-94.
- 4 32. Gerwig M, Haerter K, Hajjar K, Dimitrova A, Maschke M, Kolb FP, et al. Trace  
5 eyeblink conditioning in human subjects with cerebellar lesions. *Exp Brain*  
6 *Res* 2006;170(1):7-21.
- 7 33. Daum I, Schugens MM, Ackermann H, Lutzenberger W, Dichgans J, Birbaumer  
8 N. Classical conditioning after cerebellar lesions in humans. *Behav Neurosci*  
9 1993;107(5):748-56.
- 10 34. Logan CG, Grafton ST. Functional anatomy of human eyeblink conditioning  
11 determined with regional cerebral glucose metabolism and positron-emission  
12 tomography. *Proc Natl Acad Sci U S A* 1995;92(16):7500-4.
- 13 35. Attwell PJ, Ivarsson M, Millar L, Yeo CH. Cerebellar mechanisms in eyeblink  
14 conditioning. *Ann N Y Acad Sci* 2002;978:79-92.
- 15 36. Clark RE, Squire LR. Classical conditioning and brain systems: the role of  
16 awareness. *Science* 1998;280(5360):77-81.
- 17 37. Takehara-Nishiuchi K, Kawahara S, Kirino Y. NMDA receptor-dependent  
18 processes in the medial prefrontal cortex are important for acquisition and the  
19 early stage of consolidation during trace, but not delay eyeblink conditioning.  
20 *Learn Mem* 2005;12(6):606-14.
- 21 38. Robbins TW, James M, Lange KW, Owen AM, Quinn NP, Marsden CD.  
22 Cognitive performance in multiple system atrophy. *Brain* 1992;115 Pt 1:271-  
23 91.
- 24 39. Konagaya M, Konagaya Y, Sakai M, Matsuoka Y, Hashizume Y. Progressive  
25 cerebral atrophy in multiple system atrophy. *J Neurol Sci* 2002;195(2):123-7.
- 26 40. Armstrong RA, Lantos PL, Cairns NJ. Multiple system atrophy: laminar  
27 distribution of the pathological changes in frontal and temporal neocortex--a  
28 study in ten patients. *Clin Neuropathol* 2005;24(5):230-5.
- 29 41. Marinelli L, Perfetti B, Moisello C, Di Rocco A, Eidelberg D, Abbruzzese G, et  
30 al. Increased reaction time predicts visual learning deficits in Parkinson's  
31 disease. *Mov Disord* 2010;25(10):1498-501.
- 32 42. Jellinger KA, Bancher C. Neuropathology. In: Litvan I, Agid Y, editors.  
33 *Progressive supranuclear palsy*. New York: University Press, 1992:45-88.
- 34 43. Coblenz JM, Mattis S, Zingesser L. Presenile dementia. Clinical aspects and  
35 evaluation of cerebrospinal fluid dynamics. *Archives of Neurology*  
36 1973;29:299-308.
- 37 44. Schmidt R, Freidl W, Fazekas F, Reinhart B, Grieshofer P, Koch M, et al. The  
38 Mattis Dementia Rating Scale: normative data from 1,001 healthy volunteers.  
39 *Neurology* 1994;44(5):964-6.
- 40 45. Llebaria G, Pagonabarraga J, Kulisevsky J, Garcia-Sanchez C, Pascual-Sedano  
41 B, Gironell A, et al. Cut-off score of the Mattis Dementia Rating Scale for  
42 screening dementia in Parkinson's disease. *Mov Disord* 2008;23(11):1546-50.
- 43 46. Beck AT, Steer RA, Garbin MG. Inventory for measuring depression. *Arch Gen*  
44 *Psychiatry* 1961;4:561-571.

1 47. Sommer M, Grafman J, Clark K, Hallett M. Learning in Parkinson's disease:  
2 eyeblink conditioning, declarative learning, and procedural learning. *J Neurol*  
3 *Neurosurg Psychiatry* 1999;67:27-34.  
4  
5  
6  
7  
8

## 9 **Legends to tables and figures**

10 **Table 1:** Characteristics of the MSA patients. Type: Parkinsonian (MSA-P) or cerebellar (MSA-C)  
11 predominance; LED = L-Dopa equivalent dose, + indicates additional budipine medication, #  
12 additional anticholinergic medication; UPDRS = Unified Parkinson's disease rating scale, motor  
13 examination only (high number of points indicates high disability); MMS= Mini Mental State (30  
14 points are normal,  $\leq 26$  is usually considered as cognitive impairment). Cerebellar impairment was  
15 evaluated for ataxia (arm, leg), saccades and intention tremor (finger-nose test), autonomic  
16 impairment for postural faintness, syncopes, urinary incontinence or retention, faecal incontinence,  
17 and impotence (males only). Pyramidal tract impairment was scored for hyperreflexia and Babinski  
18 sign. Each item was scored if present with 1, otherwise 0. In the Hamilton scale a low score  
19 indicates few depressive symptoms. \*not investigated.  
20  
21  
22  
23  
24  
25  
26  
27  
28  
29  
30  
31  
32  
33  
34  
35  
36

37 **Table 2:** Characteristics of controls, IPD and PSP patients in part taken from earlier publications.<sup>12</sup>

38  
39 <sup>14</sup> Dementia had been ruled out using the Mattis Dementia Rating scale (MDRS)<sup>43 44</sup>, where higher  
40 scores out of a maximum of 144 indicate better performance, with a cut-off  $\leq 123$  considered as  
41 cognitive impairment<sup>45</sup>. Depression had been assessed using the Beck Depression Inventory (BDI),  
42 where higher scores out of a maximum of 63 points indicate a more severe depressed state, and a  
43 score of 15 is regarded as cut off for a self report of mild depression.<sup>46 47</sup> \*not investigated. The  
44 MDRS was not available at the German study sites.  
45  
46  
47  
48  
49  
50  
51  
52  
53  
54  
55

56 **Figure 1:** Blink reflex recovery cycle with interstimulus intervals of 100, 300 and 600 ms. In MSA  
57 patients, the inhibition of the ipsilateral R2 response to the second stimulus is weaker than in the  
58  
59  
60

1 control group. Data of MSA patients and controls are indicated as average value and single standard  
2 deviation. Data for IPD and PSP patients (dashed lines) were taken from our earlier studies using  
3 identical methods.<sup>12 14</sup>

4  
5 **Figure 2:** Conditioned eyeblink responses in two different paradigms: left, delay (interstimulus  
6 interval 0 ms), right, trace paradigm (interstimulus interval 600 ms). In both paradigms, the number  
7 of conditioned responses was significantly lower in MSA and PSP patients than in the control and  
8 IPD groups indicating impaired implicit learning. CS, conditioned stimulus (tone), UCS,  
9 unconditioned stimulus (electrical stimulation to the supraorbital nerve). Data of MSA patients and  
10 controls are indicated as average value and single standard deviation. Data for IPD and PSP patients  
11 (dashed lines) were taken from our earlier studies using identical methods.<sup>12 14</sup>

12  
13 **Figure 3:** Occurrence of ‘alpha-blinks’. These bursts are a startle reaction to the tone (CS) and are  
14 less frequent in MSA and PSP patients than in the control and IPD groups. Data for IPD and PSP  
15 patients were taken from our earlier studies using identical methods.<sup>12 14</sup> Data are indicated as  
16 average value and single standard deviation and were pooled for both paradigms.

17  
18 **Figure 4: A** Reaction time in a serial reaction time task (SRTT). An implicit learning effect is  
19 indicated by the reaction time increase between the last sequence block (6) and the following  
20 random block (7). **B** Explicit learning in the SRTT was tested after each block by manual retrieval  
21 of the sequence (repetition of the last 10 key presses) and revealed no significant difference between  
22 groups. Data are indicated as average value and single standard deviation. Data for IPD and PSP  
23 patients were taken from our earlier studies using identical methods.<sup>12 14</sup> Asterisks indicate a  
24 significant difference for the comparison of blocks 6 and 7 ( $p < 0.05$ ).



1 **Figure 5:** Overview of the mean percentage of conditioned eyeblink responses (CRs) across blocks  
2 3-6 in the EBCC paradigms in MSA patients and control subjects from this study and in IPD and  
3 PSP patients from earlier studies.<sup>12 14</sup> With the trace paradigm a complete separation between IPD  
4 and the atypical Parkinsonian syndromes MSA and PSP is achieved (cutoff 26%), whereas in the  
5 delay paradigm there is a small overlap between these groups. Overall, IPD patients perform slightly  
6 better than control subjects,<sup>13</sup> further enhancing the group distinction between IPD and atypical  
7 syndromes.

For peer review only

1  
2  
3  
4  
5  
6  
7  
8  
9  
10  
11  
12  
13  
14  
15  
16  
17  
18  
19  
20  
21  
22  
23  
24  
25  
26  
27  
28  
29  
30  
31  
32  
33  
34  
35  
36  
37  
38  
39  
40  
41  
42  
43  
44  
45  
46  
47  
48  
49  
50  
51  
52  
53  
54  
55  
56  
57  
58  
59  
60

For peer

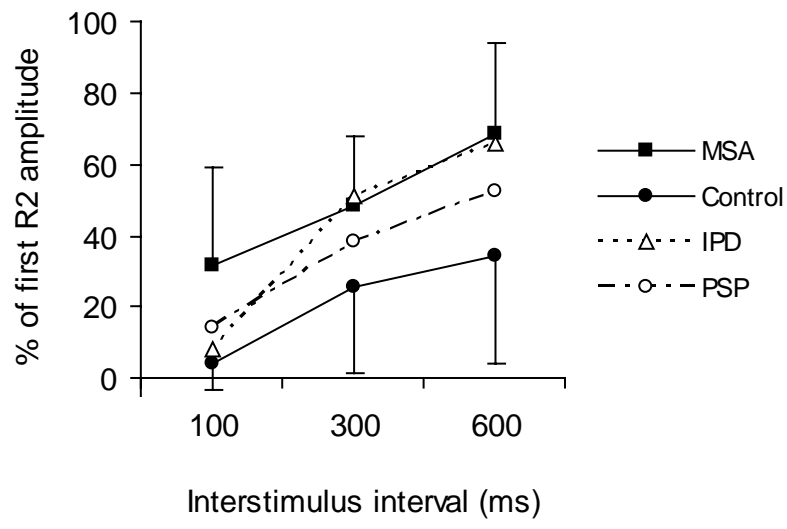

Figure 1, von Lewinski et al.

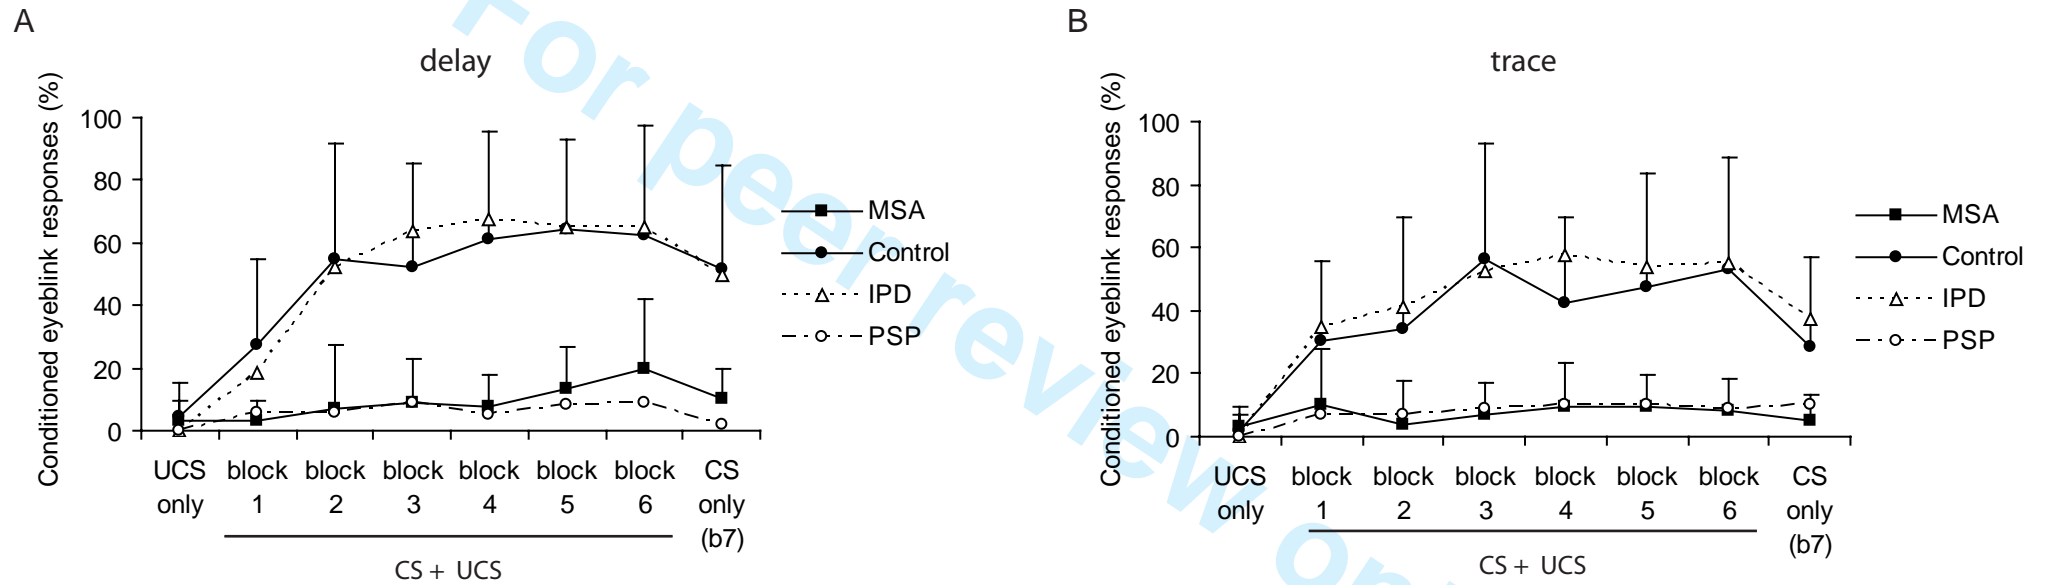

Figure 2, von Lewinski et al.

1  
2  
3  
4  
5  
6  
7  
8  
9  
10  
11  
12  
13  
14  
15  
16  
17  
18  
19  
20  
21  
22  
23  
24  
25  
26  
27  
28  
29  
30  
31  
32  
33  
34  
35  
36  
37  
38  
39  
40  
41  
42  
43  
44  
45  
46  
47  
48  
49  
50  
51  
52  
53  
54  
55  
56  
57  
58  
59  
60

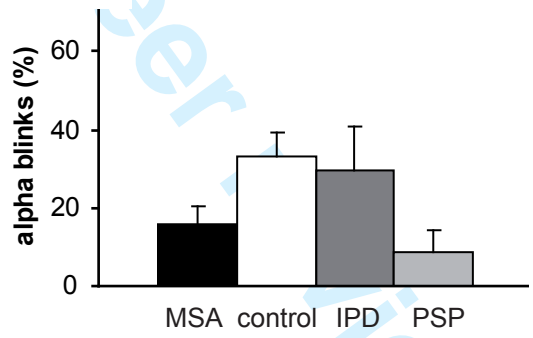

Figure 3, von Lewinski et al.

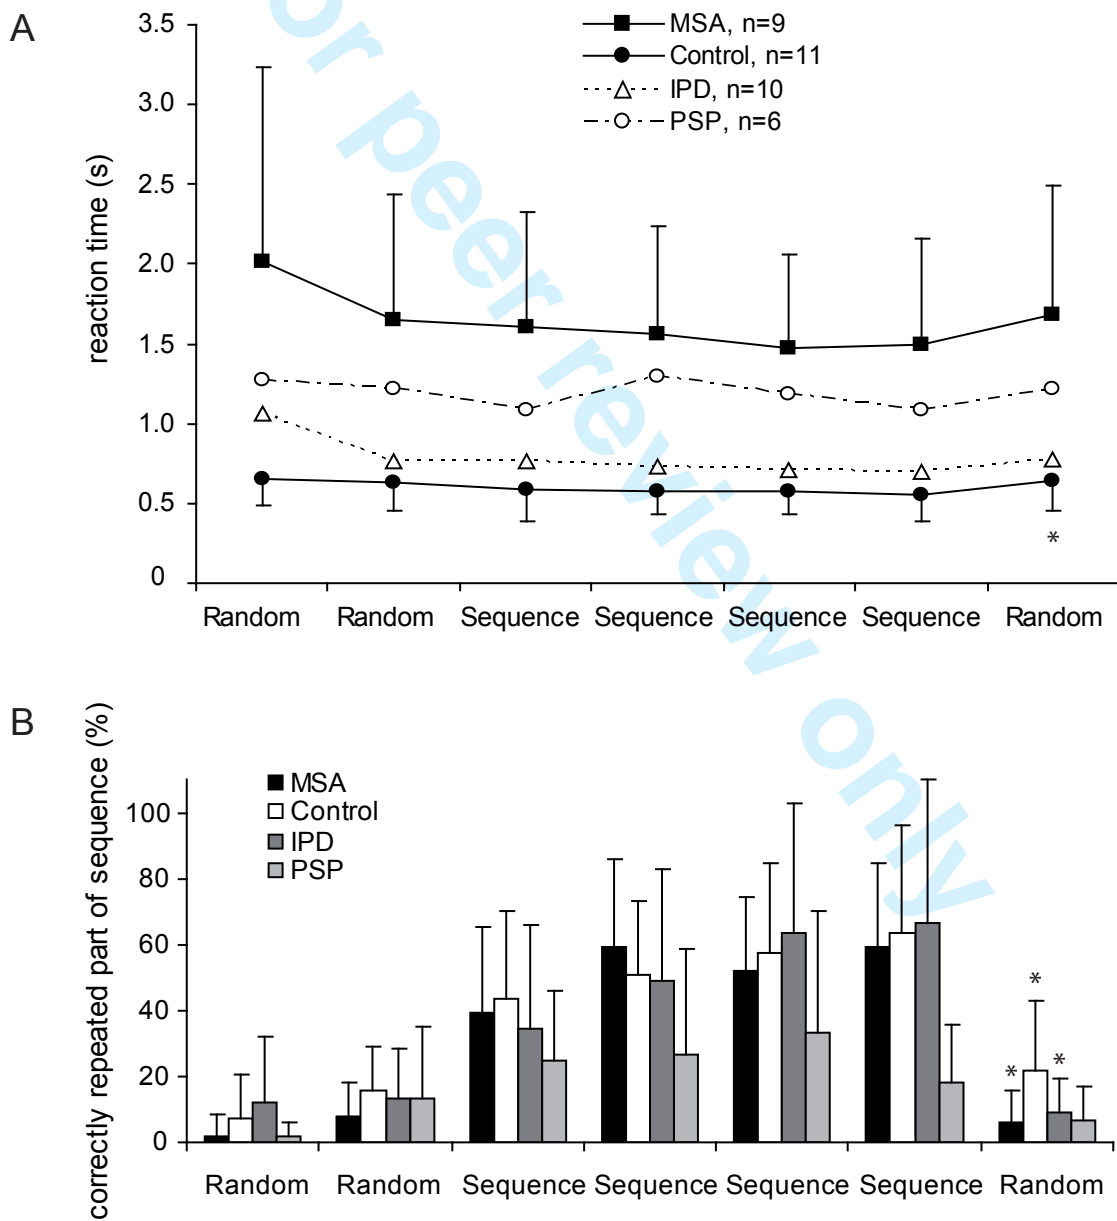

Figure 4, von Lewinski et al.

1  
2  
3  
4  
5  
6  
7  
8  
9  
10  
11  
12  
13  
14  
15  
16  
17  
18  
19  
20  
21  
22  
23  
24  
25  
26  
27  
28  
29  
30  
31  
32  
33  
34  
35  
36  
37  
38  
39  
40  
41  
42  
43  
44  
45  
46  
47  
48  
49  
50  
51  
52  
53  
54  
55  
56  
57  
58  
59  
60

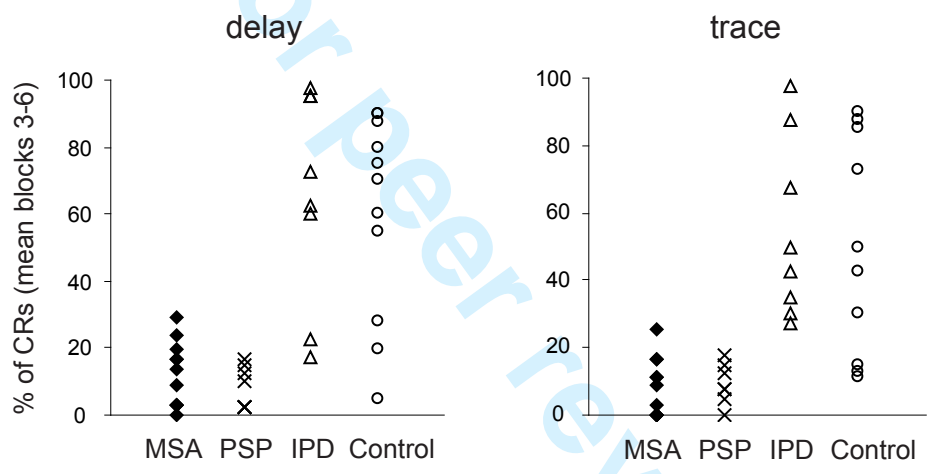

Figure 5, von Lewinski et al.



1  
2  
3  
4  
5  
6  
7  
8  
9  
10  
11  
12  
13  
14  
15  
16  
17  
18  
19  
20  
21  
22  
23  
24  
25  
26  
27  
28  
29  
30  
31  
32  
33  
34  
35  
36  
37  
38  
39  
40  
41  
42  
43  
44  
45  
46  
47  
48  
49  
50  
51  
52  
53  
54  
55  
56  
57  
58  
59  
60

1 **ABSTRACT**

2 **Objectives:** Learning as measured by eyeblink classical conditioning is preserved in patients with  
3 idiopathic Parkinson's disease, but severely affected in patients with progressive supranuclear palsy.  
4 We here sought to clarify whether procedural learning is impaired in multiple system atrophy, and  
5 whether it may be helpful for the differentiation of Parkinsonian syndromes.

6 **Design:** We investigated learning using (1) eyeblink classical conditioning with a delay  
7 (interstimulus interval 0 ms) and a trace (600 ms) paradigm and (2) a serial reaction time task.

8 **Setting:** Participants were recruited from academic research centers.

9 **Participants:** 11 patients with multiple system atrophy and 11 healthy controls.

10 **Results:** Implicit learning in eyeblink classical conditioning (acquisition of conditioned responses)  
11 as well as the serial reaction time task measures of implicit learning (reaction time change) are  
12 impaired in multiple system atrophy patients as compared to controls, whereas explicit learning as  
13 measured by the sequence recall of the serial reaction time task is relatively preserved.

14 **Analysis:** We hypothesize that the MSA patients' learning deficits are due to lesions of cerebellar  
15 and connected brainstem areas.

16 **Conclusions:** A retrospective synopsis of these novel data on multiple system atrophy patients and  
17 groups of idiopathic Parkinson's disease patients and progressive supranuclear palsy patients  
18 studied earlier suggests that eyeblink classical conditioning may contribute to the early  
19 differentiation of atypical Parkinson syndromes from idiopathic Parkinson's disease. This  
20 hypothesis should be tested in a prospective trial.



1 **ARTICLE SUMMARY:**

2 **Article focus:**

- 3 • We tested if the non-motor feature of procedural learning is impaired in patients afflicted with  
4 multiple system atrophy.
- 5 • We studied the eyeblink classical conditioning and a serial reaction time task in 11 MSA  
6 patients and matched control subjects.

7

8 **Key messages:**

- 9 • Blink reflex pathways were intact, but eyeblink conditioning was significantly impaired in  
10 MSA patients. By contrast, the serial reaction time task was difficult and inconclusive in  
11 these patients due to motor constraints impairing finger tapping.
- 12 • A retrospective comparison with previously studied groups patients with idiopathic  
13 Parkinson's disease or Progressive Supranuclear Palsy points to a putative role of eyeblink  
14 conditioning in distinguishing typical from atypical Parkinsonian disorders.

15

16 **Strength and limitations:**

- 17 • The study differentiates feasible and non-feasible assessments of procedural learning in  
18 multiple system atrophy.
- 19 • The comparison to other patient groups is clearly retrospective and needs to be validated by a  
20 prospective trial.
- 21

## 1 INTRODUCTION

2 Multiple system atrophy (MSA) is a progressive neurodegenerative disorder characterized by an  
3 absent or poorly levodopa responsive Parkinsonism, cerebellar dysfunction and autonomic failure.<sup>1</sup>  
4 A predominantly Parkinsonian (MSA-P) and a cerebellar subtype (MSA-C) are recognized. Despite  
5 the development of consensus criteria,<sup>2</sup> the differential diagnosis between MSA and other  
6 hypokinetic rigid syndromes, such as idiopathic Parkinson's disease (IPD) or progressive  
7 supranuclear palsy (Steele-Richardson-Olszewski syndrome, PSP), remains a clinical challenge.<sup>3 4</sup>

8 Recent years have seen an increasing focus on non-motor symptoms such as cognitive deficits  
9 in Parkinsonian disorders. Different patterns of cognitive impairment including deficits in executive  
10 function and learning abilities have been described.<sup>5-9</sup>

11 A well established task to study associative, procedural learning<sup>10</sup> is eyeblink classical  
12 conditioning (EBCC), which some regard as a model of implicit learning.<sup>11</sup> Previous studies have  
13 shown that learning as measured by EBCC is normal in patients with IPD, but, severely affected in  
14 patients with PSP.<sup>12-14</sup> The serial reaction time task (SRTT) is another established task for which the  
15 implicit measures of motor skill (reaction time and errors) were close to normal in IPD patients, but  
16 impaired in PSP patients, whereas sequence recall as measure of explicit learning were largely  
17 preserved in both groups.<sup>12 14</sup> We sought to investigate whether implicit learning deficits are specific  
18 for PSP or present in MSA as well, thereby comparing the clinical feasibility of SRTT and of EBCC  
19 in this patient group.

## 21 METHODS

### 22 Subjects

23 11 MSA patients were recruited from the outpatient clinics in Munich and Göttingen between 1999  
24 and 2008 (**table 1**). The clinical diagnosis of "probable MSA" was established following consensus  
25 criteria.<sup>2</sup> 7 MSA patients were taking L-Dopa, two dopamine agonists (ropinirole, pramipexole),  
26 one amantadine, one budipine, one biperiden, another metixen, and two were taking antidepressants.

1 L-Dopa equivalent doses (LEDs) were calculated according to Tomlinson and colleagues<sup>15</sup> except  
 2 for budipine, biperiden and metixen, where no conversion factor was given.

3 To rule out an immediate impact of medication on the patients' memory performance, the anti-  
 4 parkinsonian medication was discontinued on the morning of the day of the study. MSA patients  
 5 were compared with 11 age matched healthy control subjects (mean age 59.5±10.0 years, 6 male, 5  
 6 female), of which a subgroup was already involved in our earlier published study (numbers  
 7 2,3,5,6,8,9,11,12,14 according to Table 2 in<sup>12</sup>). All participants gave written informed consent; the  
 8 research protocol was approved by the local ethics committee. Neither the patients nor the control  
 9 subjects had any sign of cranial nerve impairment or auditory deficits in routine neurological  
 10 examination.

Table 1

| Pat<br>Nr. | MSA<br>Type | Age<br>[year] | Sex | Duratio<br>n<br>[year] | L-Dopa<br>response | LED<br>[mg]      | UPDRS<br>Max=108 | Cerebellar<br>Max=4 | Autonomic<br>Max=5[f], 6[m] | Pyramida<br> <br>Max=2 | Hamilton<br>Max=69 | MMS<br>Max=30 |
|------------|-------------|---------------|-----|------------------------|--------------------|------------------|------------------|---------------------|-----------------------------|------------------------|--------------------|---------------|
| 1          | P           | 66            | F   | 9                      | Poor               | 0 <sup>+</sup>   | 50               | 0                   | 1                           | 0                      | 11                 | 27            |
| 2          | P           | 69            | M   | 4.5                    | Poor               | 125              | 20               | 0                   | 2                           | 0                      | 20                 | 30            |
| 3          | P           | 73            | M   | 8                      | Absent             | 255              | 16               | 0                   | 3                           | 0                      | 15                 | 28            |
| 4          | P           | 59            | F   | 1.5                    | Poor               | 125 <sup>#</sup> | 30               | 0                   | 2                           | 1                      | 16                 | 26            |
| 5          | P           | 71            | M   | 4                      | Absent             | 150              | 35               | 0                   | 4                           | 0                      | 6                  | 29            |
| 6          | P           | 75            | M   | 5                      | Modest             | 524              | 38               | 0                   | 3                           | 0                      | 6                  | 29            |
| 7          | P           | 75            | F   | 3                      | Poor               | 375              | 40               | 0                   | 3                           | 0                      | 10                 | 28            |
| 8          | P           | 58            | M   | 3                      | Poor               | 105 <sup>#</sup> | 18               | 0                   | 1                           | 0                      | 2                  | 30            |
| 9          | C           | 64            | M   | 2                      | Poor               | 900              | 69               | 2                   | 2                           | 0                      | 22                 | 27            |
| 10         | C           | 56            | M   | 2.5                    | *                  | 0                | 5                | 3                   | 1                           | 0                      | 16                 | 28            |
| 11         | C           | 60            | F   | 8                      | *                  | 0                | 30               | 3                   | 3                           | 1                      | 14                 | 26            |
| Mean       |             | 66.0          |     | 4.6                    |                    |                  | 31.9             | 0.7                 | 2.3                         | 0.2                    | 12.5               | 28.0          |
| S.D.       |             | 7.1           |     | 2.6                    |                    |                  | 17.7             | 1.3                 | 1.0                         | 0.4                    | 6.2                | 1.4           |

11

## 12 Clinical testing procedures

13 The Hamilton rating scale for depression<sup>16</sup> and the Mini-Mental state examination<sup>17</sup> were used to  
 14 quantify the affective and general cognitive status, respectively, with pragmatic and established  
 15 tests. Motor features in patients were evaluated with the Unified Parkinson Disease Rating Scale  
 16 (UPDRS, part III).<sup>18</sup> Further clinical assessments are listed in table 1.

1 To investigate eyeblink function we used the blink reflex (BR) and its R2 recovery cycle  
2 detailed elsewhere.<sup>12 19 20</sup> In brief, a single electrical stimulation of the supraorbital nerve (duration:  
3 0.2 ms) elicits an early unilateral (R1) and a late bilateral (R2) blink response. Paired-pulse  
4 supraorbital stimulation probes brainstem interneuronal excitability and yields an inhibition of the  
5 R2 of the second stimulus. We used interstimulus intervals (ISIs) of 100 ms, 300 ms and 600 ms on  
6 both sides. For EBCC we stimulated the side in which amplitudes and latencies were within or close  
7 to the normal range or arbitrarily the right supraorbital nerve if no side-differences were found.

### 9 **EBCC-implicit learning**

10 The procedures were virtually identical to and detailed in the earlier studies from our group.<sup>12 14</sup> In  
11 brief, an unconditioned stimulus, i.e. an electric pulse over the supraorbital nerve, invariably  
12 induces an eyeblink reflex. It is paired with a preceding conditioned stimulus, i.e. a tone, which by  
13 itself may elicit early startle responses (so called alpha blinks, within 200 ms after the tone). With  
14 repeated presentation of the tone and the electric pulse, a conditioned eyeblink response is expected  
15 to occur before the onset of the electrical stimulus. In the current study, the tone (conditioned  
16 stimulus, CS, 400 ms duration) was generated by a custom built sound generator (Department of  
17 Electronic Engineering, University of Goettingen) and presented via earphones (Cherry Inc., Japan)  
18 at an intensity perceived as very loud by each subject, usually 80 dB. A brief electrical stimulus to  
19 the supraorbital nerve eliciting a blink reflex served as unconditioned stimulus (UCS). We tested the  
20 EBCC with a two different interstimulus intervals between the end of the tone and the beginning of  
21 the electric pulse, either ISI 0 ms (delay paradigm) or 600 ms (trace paradigm), in randomized order.  
22 For each paradigm we administered six learning blocks with CS and UCS in trials 1-9, UCS only in  
23 trial 10 (to control for random blinks) and CS only in trial 11 (to test for an independent learning  
24 effect). To control for extinction of learned responses a seventh block consisted of 11 trials with CS  
25 only.<sup>21</sup> The intertrial interval was randomized between 10 and 30 seconds.

1 Electromyographic (EMG) activity was recorded using silver-silverchloride cup electrodes  
2 fixed with adhesive tape over the lower eyelid and over the ipsilateral temple.<sup>12 14</sup> EMG signals  
3 were fed into a recording device and filtered at 100 Hz and 5 kHz (SynAmps, Neuroscan Inc,  
4 Virginia, USA). To detect any ongoing muscular activity we recorded 400 ms before and 1600 ms  
5 after CS onset.

### 6 7 **Serial reaction time task (SRTT)**

8 The SRTT is established as a test of implicit learning.<sup>12 23</sup> Subjects were sitting in front of a  
9 computer screen, and were told that single asterisks would appear in one out of four positions on a  
10 computer screen. They were instructed to press a marked key on a computer keyboard that was  
11 underneath the position of the asterisk on the screen. The asterisks were presented in three random  
12 blocks (blocks 1, 2, 7) and four identical sequence blocks (blocks 3-6), in each of which a sequence  
13 of 10 elements (CBDABDCBA) was presented 10 times. After each block subjects were asked to  
14 repeat the last 10 asterisk positions manually on the computer keyboard. We analyzed reaction time,  
15 errors and number of correctly repeated parts of the sequence. This test was difficult for many  
16 patients: Only 6 patients completed the test as required, one patient discontinued after block 1 and  
17 was excluded from the analysis. Two others discontinued after block 4, one after block 3. To enable  
18 some kind of statistical analysis, the result that these patients reached in their last sequence block  
19 was carried forward to the following sequence blocks, and the result of the second random block  
20 was assumed for block 7. One patient apparently responded with random typing to the letters  
21 presented and was therefore excluded from the analysis.

### 22 23 **Comparison of MSA patients with PSP and IPD patients studied earlier**

24 While clearly retrospective, we have taken the liberty to compare the MSA patients results obtained  
25 here with the group of PSP patients that we studied in 2001<sup>14</sup> and a subgroup of IPD patients  
26 studied in 1999 with identical methods (numbers 1-4 and 6-11 according to Table 1 in<sup>12</sup>, selected to

1 match the current MSA group with regard to the disease severity according to UPDRS part III).  
 2 Demographical data are cited in table 2. In figure 1, 2 and 4, data from these IPD and PSP patients  
 3 are given in dashed lines.

Table 2

| Nr.  | group | Age    |     | Dura-<br>tion<br>[year] | UPDRS<br>Max=108 | BDI<br>Max=63 | MMS<br>Max=30 | MDRS<br>Max=144 |
|------|-------|--------|-----|-------------------------|------------------|---------------|---------------|-----------------|
|      |       | [year] | Sex |                         |                  |               |               |                 |
| 1    | C     | 57     | m   | -                       | -                | 2             |               | 144             |
| 2    | C     | 60     | f   | -                       | -                | 9             |               | 142             |
| 3    | C     | 50     | m   | -                       | -                | 0             |               | 141             |
| 4    | C     | 64     | f   | -                       | -                | 0             |               | 142             |
| 5    | C     | 58     | m   | -                       | -                | 1             |               | 138             |
| 6    | C     | 73     | m   | -                       | -                | 6             |               | 134             |
| 7    | C     | 49     | f   | -                       | -                | 0             |               | 143             |
| 8    | C     | 45     | m   | -                       | -                | 1             |               | 144             |
| 9    | C     | 53     | m   | -                       | -                | 1             |               | 142             |
| 10   | C     | 73     | f   | -                       | -                | 11            | 30            |                 |
| 11   | C     | 72     | f   | -                       | -                | 0             | 30            |                 |
| Mean |       | 59.5   |     |                         |                  | 2.6           |               |                 |
| S.D. |       | 10.0   |     |                         |                  | 3.6           |               |                 |
| 1    | IPD   | 69     | f   | 2                       | 45               | 11            |               | 138             |
| 2    | IPD   | 64     | f   | 6                       | 39               | 15            |               | 143             |
| 3    | IPD   | 62     | m   | 5                       | 21               | 9             |               | 132             |
| 4    | IPD   | 45     | m   | 6                       | 28               | 5             |               | 141             |
| 5    | IPD   | 47     | m   | 7                       | 31               | 6             |               | 139             |
| 6    | IPD   | 49     | m   | 7                       | 25               | 6             |               | 140             |
| 7    | IPD   | 64     | m   | 9                       | 47               | 11            |               | 135             |
| 8    | IPD   | 63     | m   | 8                       | 16               | 11            |               | 141             |
| 9    | IPD   | 61     | m   | 5                       | 33               | 8             |               | 143             |
| 10   | IPD   | 50     | m   | 3                       | 44               | 11            |               | 143             |
| Mean |       | 57.4   |     | 5.8                     | 32.9             | 9.3           |               | 139.5           |
| S.D. |       | 8.7    |     | 2.1                     | 10.7             | 3.1           |               | 3.7             |
| 1    | PSP   | 54     | m   | 2                       | 22               | 6             | 30            | 127             |
| 2    | PSP   | 69     | m   | 9                       | 34               | 0             | 28            | 110             |
| 3    | PSP   | 65     | f   | 2                       | 44               | 13            | 28            | 107             |
| 4    | PSP   | 57     | f   | 3                       | 30               | 35            | 30            | 135             |
| 5    | PSP   | 66     | m   | 2                       | 30               | 13            | 28            | 135             |
| 6    | PSP   | 59     | m   | 6                       | 50               | 4             | 22            | 100             |
| 7    | PSP   | 68     | f   | 4                       | 43               | 50            | 18            | 116             |
| 8    | PSP   | 63     | m   | 5                       | 54               | *             | 23            | 112             |
| Mean |       | 62.6   |     | 4.1                     | 38.4             | 17.3          | 25.9          | 117.8           |
| S.D. |       | 5.4    |     | 2.5                     | 11.1             | 18.4          | 4.4           | 13.1            |

## 5 Data analysis

6 R2 latencies were measured off-line. For analysis of the blink reflex recovery cycle, we entered the  
 7 R2 amplitudes of the second pulse normalized to the R2 amplitudes of the first pulse into a repeated  
 8 measures analysis of variance (ANOVA) with “interstimulus interval” (100; 300, 600 ms) as within

1 subject factor and “group” (control and MSA; or control, MSA, IPD, PSP) as between subject  
2 factor.<sup>12 19 20</sup> In the EBCC, EMG bursts were regarded as alpha-blinks, i.e. startle responses, or  
3 conditioned responses (CRs) if they occurred within the appropriate time window (alpha blinks:  
4 within 200ms after onset of tone (CS); CRs: within 200 ms before electrical stimulus (UCS)) and if  
5 their amplitude exceeded the baseline noise by at least 1.5 fold and reached at least 50  $\mu$ V. For the  
6 tone-alone-trials we extended the time window until 300 ms after the end of the UCS to detect  
7 delayed CRs.<sup>22</sup> We analyzed the percentage of conditioned eyeblink responses and of alpha blinks  
8 with separate repeated measures ANOVAs with “block” (blocks 1-6, CS only block) as within  
9 subject factor and “group” (control and MSA; or control, MSA, IPD, PSP) and “paradigm” (delay  
10 versus trace) as between subject factors. In addition, we repeated the ANOVAs for conditioned  
11 eyeblink responses with the individual average alpha blink rate across all seven blocks as covariate.

12 For SRTT, we analyzed reaction time, accuracy errors and retrieval using separate repeated  
13 measures ANOVAs with “block” (blocks 1-7) as within subject factor and “group” (control and  
14 MSA; or control, MSA, IPD, PSP) as between subject factor. In all analyses, Mauchly’s sphericity  
15 test was performed and Greenhouse–Geisser correction was applied when necessary. The level of  
16 significance was set at  $p < 0.05$ . Post-hoc t-tests were Bonferroni-corrected. A correlation between  
17 two parameters was determined by calculating Pearson’s correlation coefficient and was reported if  
18 it was higher than 0.75 or lower than -0.75. The results are given as mean values  $\pm$  one standard  
19 deviation.

## 21 RESULTS

### 22 Rating scales

23 Details of age, sex, disease duration, L-Dopa response and rating scales of MSA patients are  
24 displayed in **table 1**. UPDRS scores for motor impairment placed the patients in an intermediately  
25 impaired range. The Hamilton depression score revealed mild depressive symptoms (mean  $12.5 \pm 6.2$   
26 out of 69 points) and the Mini-Mental State scored between 26 and 30 points (mean  $28.0 \pm 1.4$ )

1 indicating mild cognitive impairment in more than half of the patients. These results are comparable  
2 to the IPD and PSP groups reported earlier.<sup>12 14</sup>  
3

#### 4 **Blink reflex pathways**

5 Blink reflex responses in MSA patients showed normal latencies (ipsilateral R1: 11.6±1.0 ms,  
6 ipsilateral R2: 31.5±4.9 ms contralateral R2: 34.4±4.1 ms). An R2 recovery cycle could be obtained  
7 in all patients (**figure 1**) with no significant side difference between the ipsi- and contralateral R2  
8 recovery. MSA patients showed significantly less R2 inhibition compared to the control group  
9 (repeated-measures ANOVA MSA-controls, effect of group,  $F(1, 20)= 15.0$ ,  $p=0.001$ ).  
10

11 -- Please insert fig. 1 about here --  
12

#### 13 **Conditioned eyeblink responses**

14 All MSA patients showed few random blinks as assessed by the UCS only trials (3.0±6.7 % across  
15 both paradigms). The conditioned responses (CRs) were first analyzed for block 1-6 excluding the  
16 tone alone trials (see below). In either paradigm MSA patients showed significantly fewer CRs than  
17 the control group (**figure 2**; repeated-measures ANOVA MSA-control, effect of group,  $F(1, 39)=$   
18  $37.1$ ,  $p<0.0001$ ; effect of block,  $F(3.4, 39)= 7.0$ ,  $p<0.0001$ ; interaction of group by block,  $F(3.4,$   
19  $266)= 3.325$ ,  $p=0.017$ , no main effect of paradigm). Adding the rate of alpha blinks as covariate to  
20 the ANOVA did not abolish the effect of group ( $F(1, 38)= 31.5$ ,  $p<0.0001$ ). These results were  
21 supported by a separate analysis of the tone alone trials (trial 11, block 1-6), in which the MSA  
22 group yielded an average number of CRs of 14±17 % in the delay and 12±17 % in the trace  
23 paradigm, which was significantly less than the control group with 73±23 % and 55±27 % of CRs  
24 respectively (ANOVA MSA-control, effect of group,  $F(1,37)=59.1$ ,  $p<0.0001$ ). There was again no  
25 main effect of paradigm, i.e. trace and delay paradigm did not differ from each other.  
56  
57  
58  
59  
60



1 Considering the MSA patients only, there was no difference in the occurrence of CRs between  
2 MSA-P and MSA-C patients (ANOVA, effect of MSA subtype,  $F(1,17)=2.5$ ,  $p=0.13$ ).

3  
4 -- Please insert fig. 2 about here -

### 6 **Alpha Blinks**

7 In either paradigm MSA patients tended to show less alpha blinks than controls (repeated measures  
8 ANOVA, effect of group  $F(1,38)=4.0$ ,  $p=0.054$ ; **figure 3**). The mean percentage of alpha blinks  
9 across all blocks in MSA patients was  $17.6\pm 4.6\%$  in the delay and  $14.4\pm 4.1\%$  in the trace  
10 paradigm, for control subjects  $31.5\pm 11.1\%$  and  $35.2\pm 11.3\%$  respectively. There were significantly  
11 more alpha blinks in earlier blocks than in late blocks for both paradigms (effect of block,  $F(4.3,$   
12  $163.7)=8.5$ ,  $p<0.0001$ ). Considering the MSA patients only, there was no statistically significant  
13 difference in the occurrence of alpha blinks between MSA-P and MSA-C patients.

14  
15 -- Please insert fig. 3 about here --

### 17 **Serial reaction time task (SRTT)**

#### 18 *Reaction time*

19 MSA patients showed longer reaction times compared with controls (repeated measures ANOVA  
20 MSA-control, effect of group,  $F(1,18)=20.2$ ,  $p<0.0001$ ; and a trend for an interaction of group by  
21 block,  $F(1.52, 27.34)=2.77$ ,  $p=0.10$ , **figure 4A**). In both groups reaction times decreased from block  
22 1 to the sequence blocks 3, 4, 5 and 6 (effect of block,  $F(1.52, 27.34)=5.5$ ,  $p=0.016$ ). The reaction  
23 time increase from sequence block 6 to random block 7, which is considered a measure of implicit  
24 learning, was significant in the control group only (t-test  $p<0.01$ ; MSA  $p=0.1$ ).

25  
26 -- Please insert fig. 4 about here --

1  
2  
3  
4  
5  
6  
7  
8  
9  
10  
11  
12  
13  
14  
15  
16  
17  
18  
19  
20  
21  
22  
23  
24  
25  
26  
27  
28  
29  
30  
31  
32  
33  
34  
35  
36  
37  
38  
39  
40  
41  
42  
43  
44  
45  
46  
47  
48  
49  
50  
51  
52  
53  
54  
55  
56  
57  
58  
59  
60

## 2 *Accuracy errors*

3 The average error rate of MSA patients across blocks was  $19.7 \pm 4.2$  %, which is significantly higher  
4 compared to controls with a rate of  $2.6 \pm 0.8$  % (repeated measures ANOVA MSA-control, effect of  
5 group,  $F(1,18)=10.1$ ,  $p=0.005$ ). In both groups error rates decreased from the first random to the  
6 sequence blocks (effect of block,  $F(3.37, 42.66)=3.9$ ,  $p=0.022$ ) and tended to increase between the  
7 last sequence block and the random block 7 without being significant.

## 9 *Retrieval of sequence*

10 There was no significant difference between MSA patients and controls in the measures of  
11 sequence detection (manual sequence retrieval, ANOVA MSA-control, effect of group,  $F(1,18)=0.7$ ,  
12  $p=0.42$ ). Both groups detected an increasing amount of the sequence during the course of the  
13 experiment (ANOVA, effect of block,  $F(3.58, 64.48)=31.0$ ,  $p<0.001$ ). A small percentage of  
14 repetition was seen even before the sequence was presented, which indicates the baseline guessing  
15 rate (**figure 4B**).

## 17 **Correlation analyses for MSA patients**

18 We did not find a significant correlation between the average number of CRs across block 3-6  
19 (steady state) and the duration of disease, the Hamilton scale score, the MMST, the motor  
20 examination of the UPDRS, the cerebellar or autonomic impairment as assessed by the scores (see  
21 table 1) for either paradigm. The percentage of manual retrieval in the SRTT did not correlate with  
22 any of these parameters either.

## 26 **Retrospective comparison of all patient groups (MSA, PSP, IPD) and the control group**

1 In the blink reflex recovery cycle, the R2 inhibition was not different between the patient groups  
2 (figure 1). For the EBCC paradigms, the lack of eyeblink conditioning in MSA patients was similar  
3 to the PSP group and differed significantly from the increasing occurrence of CRs in IPD patients  
4 and controls (ANOVA, effect of group,  $F(3,63)=23.2$ ,  $p<0.0001$ ; interaction of group by block,  
5  $F(11.1, 233.0)=3.6$ ,  $p<0.0001$ , post-hoc t-test with Bonferroni correction; figure 2). Adding the rate  
6 of alpha blinks as covariate did not abolish the effect of group ( $F(1, 32)= 16.7$ ,  $p<0.0001$ ). Also in  
7 the tone alone trials, MSA and PSP patients showed fewer CRs than the IPD and control groups  
8 (ANOVA, effect of group,  $F(3,64)=19.0$ ,  $p<0.0001$ ; interaction of group by block,  $F(15,320)=1.8$ ,  
9  $p=0.04$ ). MSA and PSP groups both showed fewer alpha blinks than IPD patients and controls  
10 (ANOVA, effect of group,  $F(3,61)=3.5$ ,  $p=0.02$ ; interaction of group by block ( $F(12.73, 259.0)=2.0$ ,  
11  $p=0.025$ ; see figure 3). However, the post-hoc t-test analysis indicated these differences to be non-  
12 significant.

13 For the differentiation of MSA and PSP from IPD we considered the mean percentage of CRs  
14 in the steady state part of the EBCC learning curve (blocks 3-6). The mean percentage of CRs  
15 allows a non-overlapping separation of the MSA and PSP groups from IPD in the trace paradigm  
16 with a cutoff at 26% (**figure 5**). In the delay paradigm, the separation between groups was less  
17 complete. Whereas all PSP patients exhibited less than 26% of CRs, the fraction of MSA patients  
18 with values equal or below 26% was 0.91. This corresponds to sensitivity values for the separation  
19 of PSP and MSA from IPD of 100% and 91%, respectively. If the specificity is defined as the  
20 fraction of IPD patients with CRs values above 26%, the specificity in the delay paradigm is 75%.  
21 As reported above, the sensitivity and specificity values for the trace paradigm are 100%. The  
22 slightly better performance of IPD patients<sup>13</sup> as compared to controls was not significant.

23  
24 -- Please insert fig. 5 about here --

1 In the SRTT, MSA patients showed significantly longer reaction times than the IPD patients,  
2 but no significant difference compared to the PSP group (ANOVA: effect of group  $F(3,30)=7.4$ ,  
3  $p=0.001$ ; see figure 4). With regard to the error rate, MSA patients performed again very similar to  
4 the PSP patients, who showed  $19.5\pm 1.8\%$  accuracy errors, but significantly worse than the IPD  
5 patients (error rate  $4.8\pm 1.7\%$ ; ANOVA, effect of group,  $F(3,32)=6.1$ ,  $p=0.002$ ). The sequence recall  
6 measurements revealed no statistically significant differences between groups.

## 8 DISCUSSION

9 The differentiation of IPD and atypical Parkinsonian syndromes (MSA, PSP) constitutes a challenge  
10 for neurologists, as the motor symptoms often present very similarly, in particular in the early  
11 stages. Additional markers such as imaging have been evaluated,<sup>24 25</sup> but these provide insufficient  
12 sensitivity values or are technically challenging. In addition, macroscopically discernible structural  
13 changes as detectable by MRI are likely to occur some time after functional loss has begun.  
14 Therefore functional tests might be better suited because they reveal deficits before discernible  
15 structural changes occur. In this study we focus on the differential learning abilities tested by  
16 eyeblink conditioning (EBCC) and a serial reaction time task (SRTT). First, the results of the MSA  
17 patients will be discussed, followed by a comparison with PSP and the putative impact for  
18 differentiation from IPD.

19 The MSA patients showed severely impaired implicit learning in the trace as well as in the  
20 delay eyeblink conditioning paradigm, with standard deviations in the range of other studies,<sup>10 26</sup>  
21 whereas non-learning associated blink reflex latencies as indicators of oculomotor pathways were  
22 normal.

23 Histopathological alterations in both subtypes of MSA include the substantia nigra, putamen,  
24 descending and ascending fiber tracts of the motor system, olivary and pontine nuclei, brainstem-  
25 cerebellar circuits as well as cerebellar structures (hemispheres and vermis).<sup>27-29</sup> This has been  
26 confirmed *in vivo* by diffusion tensor imaging of white matter microstructure.<sup>30</sup> We suggest that

1 damage of cerebellar structures and associated brainstem-cerebellar circuits are responsible for the  
2 failure of EBCC learning in MSA patients. This assumption is supported by the findings of impaired  
3 EBCC in patients with cerebellar damage,<sup>22 31-33</sup> positron-emission tomography (PET)  
4 measurements in healthy humans showing changes in glucose metabolism in the cerebellum and  
5 pons during EBCC<sup>21 34</sup> as well as in experiments studying the influence of selective  
6 pharmacological blockade of cerebellar input on EBCC in rabbits.<sup>35</sup> Most patients in our study were  
7 clinically characterized as MSA-P and not MSA-C. However, the failure in blink reflex acquisition  
8 in both groups points to a subclinical cerebellar involvement in MSA-P, which is in accordance  
9 with the histopathological studies.<sup>28 29</sup> EBCC therefore seems to detect cerebellar involvement at a  
10 subclinical stage.

11 In addition to the cerebellum, several studies indicate that acquisition of CR in the trace  
12 paradigm depends on forebrain areas such as the hippocampus or prefrontal cortex, in particular for  
13 longer interstimulus intervals.<sup>36 37</sup> In our study, the failure of CR acquisition in MSA patients was  
14 slightly more pronounced in the trace compared to the delay paradigm. Therefore, lesions of the  
15 frontal lobe, which have been suggested by neuropsychological testing<sup>6 38</sup> and confirmed  
16 histopathologically in a variety of MSA cases,<sup>39 40</sup> may have contributed to impaired EBCC  
17 acquisition in the trace paradigm.

18 An alternative explanation that was brought up by an anonymous reviewer is that the tone may  
19 be a less salient CS to the MSA patients than to the control group. The reduced number of alpha  
20 blinks would support this assumption. Following that very elegant line of thought, the EBCC group  
21 difference between MSA patients and control subjects would have to do less with implicit learning  
22 and more with responsiveness and associative processes related to external stimuli. While this may  
23 have some relevance, adding the number of alpha blinks to the ANOVAs on conditioned eyeblink  
24 responses did not abolish the between-group differences.

25 In the SRTT the MSA patients showed severe impairment in terms of prolonged reaction time,  
26 high error rate and, in some patients, early discontinuation due to fatigue and exhaustion. In contrast

1 to the control group they showed no significant reaction time increase between block 6 (random)  
2 and 7 (sequence) and this is indicative of implicit learning deficits. On the other hand they showed  
3 good performance on the parameters of sequence recall (explicit learning). This preservation of  
4 SRTT explicit learning parts may be explained by the relative preservation of posterior association  
5 (temporal and parietal) cortex and hippocampus in MSA. However, the validity of the SRTT  
6 learning results is limited by the discontinuation of patients and our “last observation carried  
7 forward approach” (see Methods). In addition, the patients’ motor impairment, which may interfere  
8 with the motor part of the task, and the fact that sequence learning and movement preparation seem  
9 to share similar attentional and working memory resources<sup>41</sup> have to be considered. Therefore the  
10 SRTT seems to be inappropriate to assess learning abilities in MSA patients. This is in contrast to  
11 the EBCC, which is independent of the motor performance of patients. Furthermore, EBCC circuits  
12 are located anatomically closer to the affected brainstem regions.

13 With all the limitations of such a retrospective comparison of data acquired in different patient  
14 groups by the same authors, the implicit learning impairment in MSA patients as clearly revealed by  
15 the EBCC and with some limitation by the SRTT parallels the previously reported findings in PSP  
16 patients.<sup>14</sup> Interestingly, MSA and PSP are characterized by different histopathological alterations,  
17  $\alpha$ -synuclein positive inclusions versus tau-positive aggregations, which lead to presume different  
18 pathophysiological mechanisms. However, the common involvement of cerebellar structures in both  
19 diseases<sup>27 42</sup> seems to be responsible for the clinical phenomenology independent of the cellular  
20 mechanism.

21 In contrast to MSA and PSP, IPD patients show normal<sup>12</sup> or even enhanced<sup>13</sup> acquisition of  
22 conditioned responses in EBCC. EBCC may therefore contribute to distinguish IPD from these  
23 atypical Parkinsonian syndromes. As the development of cerebellar and related neuropathology in  
24 MSA or PSP often occurs prior to or even without clinical manifestation,<sup>29 42</sup> we propose impaired  
25 EBCC particularly in the trace paradigm as an early indicator of neurodegeneration of areas beyond  
26 those typically affected in IPD. However, as the retrospective synopsis is clearly limited, the pivotal

1 questions of whether EBCC can serve as predictor for the development of typical or atypical disease  
2 and whether EBCC is a useful addition to imaging techniques in establishing an early differential  
3 diagnosis are unanswered yet and require further prospective investigation.

4

For peer review only

1  
2  
3  
4  
5  
6  
7  
8  
9  
10  
11  
12  
13  
14  
15  
16  
17  
18  
19  
20  
21  
22  
23  
24  
25  
26  
27  
28  
29  
30  
31  
32  
33  
34  
35  
36  
37  
38  
39  
40  
41  
42  
43  
44  
45  
46  
47  
48  
49  
50  
51  
52  
53  
54  
55  
56  
57  
58  
59  
60

## 1 Acknowledgements

2 We thank Prof. Mark Hallett for commenting on an earlier draft of the manuscript.

## 4 Funding

5 This work was supported by the Deutsche Forschungsgemeinschaft (DFG, grant SO 429/2-2  
6 (M.S.)), by the Bernstein Center for Computational Neuroscience (grant # 01GQ0432 (W.P.)) and  
7 by the University of Göttingen (Heidenreich von Siebold-Programm (F.v.L.)).

## 9 Contributors

10 All authors listed above fulfill all three International Committee of Medical Journal Editors  
11 (ICMJE) guidelines for authorship which are (1) substantial contributions to conception and design,  
12 acquisition of data or analysis and interpretation of data; (2) drafting the article or revising it  
13 critically for important intellectual content and (3) final approval of the version to be published.  
14 MSo, CT and WP conceived the study. MSch, FvL and MSo were responsible for obtaining the  
15 data. FvL and MSo conducted the data analysis. All authors contributed to decisions on the  
16 interpretation of results. FvL and MSo contributed to the drafting of the manuscript. CT and WP  
17 were responsible for editing and providing guidance on the paper. All authors were responsible for  
18 critically revising the paper. All authors approved the final version of the manuscript prior to  
19 submission.

20  
21 **Competing interests** None

22  
23 **Ethics approval** Ethics committee of the Medical Faculty of the University of Goettingen.

24  
25 **Data sharing statement** There are no additional data available.



1  
2  
3  
4  
5  
6  
7  
8  
9  
10  
11  
12  
13  
14  
15  
16  
17  
18  
19  
20  
21  
22  
23  
24  
25  
26  
27  
28  
29  
30  
31  
32  
33  
34  
35  
36  
37  
38  
39  
40  
41  
42  
43  
44  
45  
46  
47  
48  
49  
50  
51  
52  
53  
54  
55  
56  
57  
58  
59  
60  
1 REFERENCES

- 2 1. Kollensperger M, Geser F, Ndayisaba JP, Boesch S, Seppi K, Ostergaard K, et al.  
3 Presentation, diagnosis, and management of multiple system atrophy in  
4 Europe: final analysis of the European multiple system atrophy registry. *Mov*  
5 *Disord* 2010;25(15):2604-12.
- 6 2. Gilman S, Wenning GK, Low PA, Brooks DJ, Mathias CJ, Trojanowski JQ, et al.  
7 Second consensus statement on the diagnosis of multiple system atrophy.  
8 *Neurology* 2008;71(9):670-6.
- 9 3. Poewe W, Wenning G. The differential diagnosis of Parkinson's disease. *Eur J*  
10 *Neurol* 2002;9 Suppl 3:23-30.
- 11 4. Hughes AJ, Daniel SE, Ben-Shlomo Y, Lees AJ. The accuracy of diagnosis of  
12 parkinsonian syndromes in a specialist movement disorder service. *Brain*  
13 2002;125(Pt 4):861-70.
- 14 5. Lange KW, Tucha O, Alders GL, Preier M, Csoti I, Merz B, et al. Differentiation  
15 of parkinsonian syndromes according to differences in executive functions. *J*  
16 *Neural Transm* 2003;110(9):983-95.
- 17 6. Burk K, Daum I, Rub U. Cognitive function in multiple system atrophy of the  
18 cerebellar type. *Mov Disord* 2006;21(6):772-6.
- 19 7. Robbins TW, James M, Owen AM, Lange KW, Lees AJ, Leigh PN, et al.  
20 Cognitive deficits in progressive supranuclear palsy, Parkinson's disease, and  
21 multiple system atrophy in tests sensitive to frontal lobe dysfunction. *J Neurol*  
22 *Neurosurg Psychiatry* 1994;57(1):79-88.
- 23 8. Kehagia AA, Barker RA, Robbins TW. Neuropsychological and clinical  
24 heterogeneity of cognitive impairment and dementia in patients with  
25 Parkinson's disease. *Lancet Neurol* 2010;9(12):1200-13.
- 26 9. Balas M, Balash Y, Giladi N, Gurevich T. Cognition in multiple system atrophy:  
27 neuropsychological profile and interaction with mood. *J Neural Transm*  
28 2010;117(3):369-75.
- 29 10. Hoffland BS, Kassavetis P, Bologna M, Teo JT, Bhatia KP, Rothwell JC, et al.  
30 Cerebellum-dependent associative learning deficits in primary dystonia are  
31 normalized by rTMS and practice. *Eur J Neurosci* 2013;2013(31):1-6.
- 32 11. Christian KM, Thompson RF. Neural substrates of eyeblink conditioning:  
33 acquisition and retention. *Learn Mem* 2003;10(6):427-55.
- 34 12. Sommer M, Grafman J, Clark K, Hallett M. Learning in Parkinson's disease:  
35 eyeblink conditioning, declarative learning, and procedural learning. *J Neurol*  
36 *Neurosurg Psychiatry* 1999;67(1):27-34.
- 37 13. Daum I, Schugens MM, Breitenstein C, Topka H, Spieker S. Classical eyeblink  
38 conditioning in Parkinson's disease. *Mov Disord* 1996;11(6):639-46.
- 39 14. Sommer M, Grafman J, Litvan I, Hallett M. Impairment of eyeblink classical  
40 conditioning in progressive supranuclear palsy. *Mov Disord* 2001;16(2):240-  
41 51.

- 1 15. Tomlinson CL, Stowe R, Patel S, Rick C, Gray R, Clarke CE. Systematic review  
2 of levodopa dose equivalency reporting in Parkinson's disease. *Mov Disord*  
3 2010;25(15):2649-53.
- 4 16. Hamilton M. A rating scale for depression. *J Neurol Neurosurg Psychiatry*  
5 1960;23:56-62.
- 6 17. Folstein MF, Folstein SE, McHugh PR. "Mini-mental state". A practical method  
7 for grading the cognitive state of patients for the clinician. *J Psychiatr Res*  
8 1975;12(3):189-98.
- 9 18. Fahn S, Elton R, Committee amotUD. *Recent developments in Parkinson's*  
10 *disease*. Florham Park, NJ: Macmillan Healthcare Information, 1987.
- 11 19. Sommer M, Wobker G, Ferbert A. Voluntary eyelid contraction modifies the  
12 blink reflex recovery cycle. *Acta Neurol Scand* 1998;98(1):29-35.
- 13 20. Kimura J. The blink reflex. In: Kimura J, editor. *Electrodiagnosis in diseases of*  
14 *nerve and muscle: principles and practice*. Philadelphia: Davis, F. A.,  
15 1989:307-331.
- 16 21. Molchan SE, Sunderland T, McIntosh AR, Herscovitch P, Schreurs BG. A  
17 functional anatomical study of associative learning in humans. *Proc Natl Acad*  
18 *Sci U S A* 1994;91(17):8122-6.
- 19 22. Topka H, Valls-Sole J, Massaquoi SG, Hallett M. Deficit in classical  
20 conditioning in patients with cerebellar degeneration. *Brain* 1993;116 ( Pt  
21 4):961-9.
- 22 23. Pascual-Leone A, Grafman J, Clark K, Stewart M, Massaquoi S, Lou JS, et al.  
23 Procedural learning in Parkinson's disease and cerebellar degeneration. *Ann*  
24 *Neurol* 1993;34(4):594-602.
- 25 24. Mahlknecht P, Hotter A, Hussl A, Esterhammer R, Schocke M, Seppi K.  
26 Significance of MRI in diagnosis and differential diagnosis of Parkinson's  
27 disease. *Neurodegener Dis* 2010;7(5):300-18.
- 28 25. von Lewinski F, Werner C, Jorn T, Mohr A, Sixel-Doring F, Trenkwalder C.  
29 T2\*-weighted MRI in diagnosis of multiple system atrophy. A practical  
30 approach for clinicians. *J Neurol* 2007;254(9):1184-8.
- 31 26. Holloway JL, Trivedi P, Myers CE, Servatius RJ. Enhanced conditioned eyeblink  
32 response acquisition and proactive interference in anxiety vulnerable  
33 individuals. *Front Behav Neurosci* 2012;6(76).
- 34 27. Braak H, Rub U, Del Tredici K. Involvement of precerebellar nuclei in multiple  
35 system atrophy. *Neuropathol Appl Neurobiol* 2003;29(1):60-76.
- 36 28. Wenning GK, Tison F, Elliott L, Quinn NP, Daniel SE. Olivopontocerebellar  
37 pathology in multiple system atrophy. *Mov Disord* 1996;11(2):157-62.
- 38 29. Ozawa T, Paviour D, Quinn NP, Josephs KA, Sangha H, Kilford L, et al. The  
39 spectrum of pathological involvement of the striatonigral and  
40 olivopontocerebellar systems in multiple system atrophy: clinicopathological  
41 correlations. *Brain* 2004;127(Pt 12):2657-71.
- 42 30. Nair SR, Tan LK, Mohd Ramli N, Lim SY, Rahmat K, Mohd Nor H. A decision  
43 tree for differentiating multiple system atrophy from Parkinson's disease using  
44 3-T MR imaging. *Eur Radiol* 2013;10.

- 1 31. Gerwig M, Dimitrova A, Kolb FP, Maschke M, Brol B, Kunnel A, et al.  
2 Comparison of eyeblink conditioning in patients with superior and posterior  
3 inferior cerebellar lesions. *Brain* 2003;126(Pt 1):71-94.
- 4 32. Gerwig M, Haerter K, Hajjar K, Dimitrova A, Maschke M, Kolb FP, et al. Trace  
5 eyeblink conditioning in human subjects with cerebellar lesions. *Exp Brain*  
6 *Res* 2006;170(1):7-21.
- 7 33. Daum I, Schugens MM, Ackermann H, Lutzenberger W, Dichgans J, Birbaumer  
8 N. Classical conditioning after cerebellar lesions in humans. *Behav Neurosci*  
9 1993;107(5):748-56.
- 10 34. Logan CG, Grafton ST. Functional anatomy of human eyeblink conditioning  
11 determined with regional cerebral glucose metabolism and positron-emission  
12 tomography. *Proc Natl Acad Sci U S A* 1995;92(16):7500-4.
- 13 35. Attwell PJ, Ivarsson M, Millar L, Yeo CH. Cerebellar mechanisms in eyeblink  
14 conditioning. *Ann N Y Acad Sci* 2002;978:79-92.
- 15 36. Clark RE, Squire LR. Classical conditioning and brain systems: the role of  
16 awareness. *Science* 1998;280(5360):77-81.
- 17 37. Takehara-Nishiuchi K, Kawahara S, Kirino Y. NMDA receptor-dependent  
18 processes in the medial prefrontal cortex are important for acquisition and the  
19 early stage of consolidation during trace, but not delay eyeblink conditioning.  
20 *Learn Mem* 2005;12(6):606-14.
- 21 38. Robbins TW, James M, Lange KW, Owen AM, Quinn NP, Marsden CD.  
22 Cognitive performance in multiple system atrophy. *Brain* 1992;115 Pt 1:271-  
23 91.
- 24 39. Konagaya M, Konagaya Y, Sakai M, Matsuoka Y, Hashizume Y. Progressive  
25 cerebral atrophy in multiple system atrophy. *J Neurol Sci* 2002;195(2):123-7.
- 26 40. Armstrong RA, Lantos PL, Cairns NJ. Multiple system atrophy: laminar  
27 distribution of the pathological changes in frontal and temporal neocortex--a  
28 study in ten patients. *Clin Neuropathol* 2005;24(5):230-5.
- 29 41. Marinelli L, Perfetti B, Moisello C, Di Rocco A, Eidelberg D, Abbruzzese G, et  
30 al. Increased reaction time predicts visual learning deficits in Parkinson's  
31 disease. *Mov Disord* 2010;25(10):1498-501.
- 32 42. Jellinger KA, Bancher C. Neuropathology. In: Litvan I, Agid Y, editors.  
33 *Progressive supranuclear palsy*. New York: University Press, 1992:45-88.
- 34 43. Coblenz JM, Mattis S, Zingesser L. Presenile dementia. Clinical aspects and  
35 evaluation of cerebrospinal fluid dynamics. *Archives of Neurology*  
36 1973;29:299-308.
- 37 44. Schmidt R, Freidl W, Fazekas F, Reinhart B, Grieshofer P, Koch M, et al. The  
38 Mattis Dementia Rating Scale: normative data from 1,001 healthy volunteers.  
39 *Neurology* 1994;44(5):964-6.
- 40 45. Llebaria G, Pagonabarraga J, Kulisevsky J, Garcia-Sanchez C, Pascual-Sedano  
41 B, Gironell A, et al. Cut-off score of the Mattis Dementia Rating Scale for  
42 screening dementia in Parkinson's disease. *Mov Disord* 2008;23(11):1546-50.
- 43 46. Beck AT, Steer RA, Garbin MG. Inventory for measuring depression. *Arch Gen*  
44 *Psychiatry* 1961;4:561-571.

1 47. Sommer M, Grafman J, Clark K, Hallett M. Learning in Parkinson's disease:  
2 eyeblink conditioning, declarative learning, and procedural learning. *J Neurol*  
3 *Neurosurg Psychiatry* 1999;67:27-34.  
4  
5  
6  
7  
8

## 9 **Legends to tables and figures**

10 **Table 1:** Characteristics of the MSA patients. Type: Parkinsonian (MSA-P) or cerebellar (MSA-C)  
11 predominance; LED = L-Dopa equivalent dose, + indicates additional budipine medication, #  
12 additional anticholinergic medication; UPDRS = Unified Parkinson's disease rating scale, motor  
13 examination only (high number of points indicates high disability); MMS= Mini Mental State (30  
14 points are normal,  $\leq 26$  is usually considered as cognitive impairment). Cerebellar impairment was  
15 evaluated for ataxia (arm, leg), saccades and intention tremor (finger-nose test), autonomic  
16 impairment for postural faintness, syncopes, urinary incontinence or retention, faecal incontinence,  
17 and impotence (males only). Pyramidal tract impairment was scored for hyperreflexia and Babinski  
18 sign. Each item was scored if present with 1, otherwise 0. In the Hamilton scale a low score  
19 indicates few depressive symptoms. \*not investigated.  
20  
21  
22  
23  
24  
25  
26  
27  
28  
29  
30  
31  
32  
33  
34  
35  
36

37 **Table 2:** Characteristics of controls, IPD and PSP patients in part taken from earlier publications.<sup>12</sup>  
38  
39 <sup>14</sup> Dementia had been ruled out using the Mattis Dementia Rating scale (MDRS)<sup>43 44</sup>, where higher  
40 scores out of a maximum of 144 indicate better performance, with a cut-off  $\leq 123$  considered as  
41 cognitive impairment<sup>45</sup>. Depression had been assessed using the Beck Depression Inventory (BDI),  
42 where higher scores out of a maximum of 63 points indicate a more severe depressed state, and a  
43 score of 15 is regarded as cut off for a self report of mild depression.<sup>46 47</sup> \*not investigated. The  
44 MDRS was not available at the German study sites.  
45  
46  
47  
48  
49  
50  
51  
52  
53  
54  
55

56 **Figure 1:** Blink reflex recovery cycle with interstimulus intervals of 100, 300 and 600 ms. In MSA  
57 patients, the inhibition of the ipsilateral R2 response to the second stimulus is weaker than in the  
58  
59  
60

1 control group. Data of MSA patients and controls are indicated as average value and single standard  
2 deviation. Data for IPD and PSP patients (dashed lines) were taken from our earlier studies using  
3 identical methods.<sup>12 14</sup>

4  
5 **Figure 2:** Conditioned eyeblink responses in two different paradigms: left, delay (interstimulus  
6 interval 0 ms), right, trace paradigm (interstimulus interval 600 ms). In both paradigms, the number  
7 of conditioned responses was significantly lower in MSA and PSP patients than in the control and  
8 IPD groups indicating impaired implicit learning. CS, conditioned stimulus (tone), UCS,  
9 unconditioned stimulus (electrical stimulation to the supraorbital nerve). Data of MSA patients and  
10 controls are indicated as average value and single standard deviation. Data for IPD and PSP patients  
11 (dashed lines) were taken from our earlier studies using identical methods.<sup>12 14</sup>

12  
13 **Figure 3:** Occurrence of ‘alpha-blinks’. These bursts are a startle reaction to the tone (CS) and are  
14 less frequent in MSA and PSP patients than in the control and IPD groups. Data for IPD and PSP  
15 patients were taken from our earlier studies using identical methods.<sup>12 14</sup> Data are indicated as  
16 average value and single standard deviation and were pooled for both paradigms.

17  
18 **Figure 4: A** Reaction time in a serial reaction time task (SRTT). An implicit learning effect is  
19 indicated by the reaction time increase between the last sequence block (6) and the following  
20 random block (7). **B** Explicit learning in the SRTT was tested after each block by manual retrieval  
21 of the sequence (repetition of the last 10 key presses) and revealed no significant difference between  
22 groups. Data are indicated as average value and single standard deviation. Data for IPD and PSP  
23 patients were taken from our earlier studies using identical methods.<sup>12 14</sup> Asterisks indicate a  
24 significant difference for the comparison of blocks 6 and 7 ( $p < 0.05$ ).

1 **Figure 5:** Overview of the mean percentage of conditioned eyeblink responses (CRs) across blocks  
2 3-6 in the EBCC paradigms in MSA patients and control subjects from this study and in IPD and  
3 PSP patients from earlier studies.<sup>12 14</sup> With the trace paradigm a complete separation between IPD  
4 and the atypical Parkinsonian syndromes MSA and PSP is achieved (cutoff 26%), whereas in the  
5 delay paradigm there is a small overlap between these groups. Overall, IPD patients perform slightly  
6 better than control subjects,<sup>13</sup> further enhancing the group distinction between IPD and atypical  
7 syndromes.

For peer review only



**Impairment of brainstem implicit learning paradigms  
differentiates multiple system atrophy (MSA) from  
idiopathic Parkinson syndrome**

|                                 |                                                                                                                                                                                                                                                                                                                 |
|---------------------------------|-----------------------------------------------------------------------------------------------------------------------------------------------------------------------------------------------------------------------------------------------------------------------------------------------------------------|
| Journal:                        | <i>BMJ Open</i>                                                                                                                                                                                                                                                                                                 |
| Manuscript ID:                  | bmjopen-2013-003098.R1                                                                                                                                                                                                                                                                                          |
| Article Type:                   | Research                                                                                                                                                                                                                                                                                                        |
| Date Submitted by the Author:   | 13-Jul-2013                                                                                                                                                                                                                                                                                                     |
| Complete List of Authors:       | Von Lewinski, Friederike; University of Goettingen, Clinical Neurophysiology<br>Schwan, Michaela; Praxis Dr. Karlbauer, Paulus, Walter; University of Goettingen, Clinical Neurophysiology<br>Trenkwalder, Claudia; Paracelsus-Elena-Klinik, Sommer, Martin; University of Goettingen, Clinical Neurophysiology |
| <b>Primary Subject Heading</b>: | Neurology                                                                                                                                                                                                                                                                                                       |
| Secondary Subject Heading:      | Neurology                                                                                                                                                                                                                                                                                                       |
| Keywords:                       | Parkinsons disease, Neurophysiology < NEUROLOGY, Learning                                                                                                                                                                                                                                                       |
|                                 |                                                                                                                                                                                                                                                                                                                 |

SCHOLARONE™  
Manuscripts





1  
2  
3  
4  
5  
6  
7  
8  
9  
10  
11  
12  
13  
14  
15  
16  
17  
18  
19  
20  
21  
22  
23  
24  
25  
26  
27  
28  
29  
30  
31  
32  
33  
34  
35  
36  
37  
38  
39  
40  
41  
42  
43  
44  
45  
46  
47  
48  
49  
50  
51  
52  
53  
54  
55  
56  
57  
58  
59  
60

1 **ABSTRACT**

2 **Objectives:** Learning as measured by eyeblink classical conditioning is preserved in patients with  
3 idiopathic Parkinson's disease, but severely affected in patients with progressive supranuclear palsy.  
4 We here sought to clarify whether procedural learning is impaired in multiple system atrophy, and  
5 whether it may be helpful for the differentiation of Parkinsonian syndromes.

6 **Design:** We investigated learning using (1) eyeblink classical conditioning with a delay  
7 (interstimulus interval 0 ms) and a trace (600 ms) paradigm and (2) a serial reaction time task.

8 **Setting:** Participants were recruited from academic research centers.

9 **Participants:** 11 patients with multiple system atrophy and 11 healthy controls.

10 **Results:** Implicit learning in eyeblink classical conditioning (acquisition of conditioned responses)  
11 as well as the serial reaction time task measures of implicit learning (reaction time change) are  
12 impaired in multiple system atrophy patients as compared to controls, whereas explicit learning as  
13 measured by the sequence recall of the serial reaction time task is relatively preserved.

14 **Analysis:** We hypothesize that the MSA patients' learning deficits are due to lesions of cerebellar  
15 and connected brainstem areas.

16 **Conclusions:** A retrospective synopsis of these novel data on multiple system atrophy patients and  
17 groups of idiopathic Parkinson's disease patients and progressive supranuclear palsy patients  
18 studied earlier suggests that eyeblink classical conditioning may contribute to the early  
19 differentiation of atypical Parkinson syndromes from idiopathic Parkinson's disease. This  
20 hypothesis should be tested in a prospective trial.

1  
2  
3  
4  
5  
6  
7  
8  
9  
10  
11  
12  
13  
14  
15  
16  
17  
18  
19  
20  
21  
22  
23  
24  
25  
26  
27  
28  
29  
30  
31  
32  
33  
34  
35  
36  
37  
38  
39  
40  
41  
42  
43  
44  
45  
46  
47  
48  
49  
50  
51  
52  
53  
54  
55  
56  
57  
58  
59  
60

1 **ARTICLE SUMMARY:**

2 **Article focus:**

- 3 • We tested if the non-motor feature of procedural learning is impaired in patients afflicted with  
4 multiple system atrophy.  
5 • We studied the eyeblink classical conditioning and a serial reaction time task in 11 MSA  
6 patients and matched control subjects.

7  
8 **Key messages:**

- 9 • Blink reflex pathways were intact, but eyeblink conditioning was significantly impaired in  
10 MSA patients. By contrast, the serial reaction time task was difficult and inconclusive in  
11 these patients due to motor constraints impairing finger tapping.  
12 • A retrospective comparison with previously studied groups patients with idiopathic  
13 Parkinson's disease or Progressive Supranuclear Palsy points to a putative role of eyeblink  
14 conditioning in distinguishing typical from atypical Parkinsonian disorders.

15  
16 **Strength and limitations:**

- 17 • The study differentiates feasible and non-feasible assessments of procedural learning in  
18 multiple system atrophy.  
19 • The comparison to other patient groups is clearly retrospective and needs to be validated by a  
20 prospective trial.  
21

## 1 INTRODUCTION

2 Multiple system atrophy (MSA) is a progressive neurodegenerative disorder characterized by an  
3 absent or poorly levodopa responsive Parkinsonism, cerebellar dysfunction and autonomic failure.<sup>1</sup>  
4 A predominantly Parkinsonian (MSA-P) and a cerebellar subtype (MSA-C) are recognized. Despite  
5 the development of consensus criteria,<sup>2</sup> the differential diagnosis between MSA and other  
6 hypokinetic rigid syndromes, such as idiopathic Parkinson's disease (IPD) or progressive  
7 supranuclear palsy (Steele-Richardson-Olszewski syndrome, PSP), remains a clinical challenge.<sup>3 4</sup>

8 Recent years have seen an increasing focus on non-motor symptoms such as cognitive deficits  
9 in Parkinsonian disorders. Different patterns of cognitive impairment including deficits in executive  
10 function and learning abilities have been described.<sup>5-9</sup>

11 A well established task to study associative, procedural learning<sup>10</sup> is eyeblink classical  
12 conditioning (EBCC), which some regard as a model of implicit learning<sup>11</sup>. Previous studies have  
13 shown that learning as measured by EBCC is normal in patients with IPD, but, severely affected in  
14 patients with PSP.<sup>12-14</sup> In contrast to tracking or pointing tasks,<sup>15 16</sup> EBCC has the advantage not to  
15 depend on manual motor skills. Learning assessed by the serial reaction time task (SRTT) showed  
16 the implicit motor skill close to normal in IPD patients, whereas PSP patients were markedly  
17 impaired; in contrast, the SRTT sequence recall component as measure of explicit learning was  
18 largely preserved in both groups.<sup>12 14</sup> We sought to investigate whether implicit learning deficits are  
19 specific for PSP or present in MSA as well, thereby comparing the clinical feasibility of SRTT and  
20 of EBCC in this patient group.

## 22 METHODS

### 23 Subjects

24 11 MSA patients were recruited from the outpatient clinics in Munich and Göttingen between 1999  
25 and 2008 (**table 1**). The clinical diagnosis of "probable MSA" was established following consensus  
26 criteria.<sup>2</sup> 7 MSA patients were taking L-Dopa, two dopamine agonists (ropinirole, pramipexole),

1 one amantadine, one budipine, one biperiden, another metixen, and two were taking antidepressants.  
 2 L-Dopa equivalent doses (LEDs) were calculated according to Tomlinson and colleagues<sup>17</sup> except  
 3 for budipine, biperiden and metixen, where no conversion factor was given.

4 To rule out an immediate impact of medication on the patients' memory performance, the anti-  
 5 parkinsonian medication was discontinued on the morning of the day of the study. MSA patients  
 6 were compared with 11 healthy control subjects, matched for age (t-test), and chosen for the absence  
 7 of neurodegenerative or any other neurological disease, and for the absence of intake of CNS-active  
 8 medication (mean age 59.5±10.0 years, 6 male, 5 female). A subgroup was already involved in our  
 9 earlier published study (numbers 2,3,5,6,8,9,11,12,14 according to Table 2 in<sup>12</sup>). All participants  
 10 gave written informed consent; the research protocol was approved by the local ethics committee.  
 11 Neither the patients nor the control subjects had any sign of cranial nerve impairment or auditory

Table 1

| Pat<br>Nr. | MSA<br>Type | Age<br>[year] | Sex | Duratio<br>n<br>[year] | L-Dopa<br>response | LED<br>[mg]      | UPDRS<br>Max=108 | Cerebellar<br>Max=4 | Autonomic<br>Max=5[f], 6[m] | Pyramida<br>l<br>Max=2 | Hamilton<br>Max=69 | MMS<br>Max=30 |
|------------|-------------|---------------|-----|------------------------|--------------------|------------------|------------------|---------------------|-----------------------------|------------------------|--------------------|---------------|
| 1          | P           | 66            | F   | 9                      | Poor               | 0 <sup>+</sup>   | 50               | 0                   | 1                           | 0                      | 11                 | 27            |
| 2          | P           | 69            | M   | 4.5                    | Poor               | 125              | 20               | 0                   | 2                           | 0                      | 20                 | 30            |
| 3          | P           | 73            | M   | 8                      | Absent             | 255              | 16               | 0                   | 3                           | 0                      | 15                 | 28            |
| 4          | P           | 59            | F   | 1.5                    | Poor               | 125 <sup>#</sup> | 30               | 0                   | 2                           | 1                      | 16                 | 26            |
| 5          | P           | 71            | M   | 4                      | Absent             | 150              | 35               | 0                   | 4                           | 0                      | 6                  | 29            |
| 6          | P           | 75            | M   | 5                      | Modest             | 524              | 38               | 0                   | 3                           | 0                      | 6                  | 29            |
| 7          | P           | 75            | F   | 3                      | Poor               | 375              | 40               | 0                   | 3                           | 0                      | 10                 | 28            |
| 8          | P           | 58            | M   | 3                      | Poor               | 105 <sup>#</sup> | 18               | 0                   | 1                           | 0                      | 2                  | 30            |
| 9          | C           | 64            | M   | 2                      | Poor               | 900              | 69               | 2                   | 2                           | 0                      | 22                 | 27            |
| 10         | C           | 56            | M   | 2.5                    | *                  | 0                | 5                | 3                   | 1                           | 0                      | 16                 | 28            |
| 11         | C           | 60            | F   | 8                      | *                  | 0                | 30               | 3                   | 3                           | 1                      | 14                 | 26            |
| Mean       |             | 66.0          |     | 4.6                    |                    |                  | 31.9             | 0.7                 | 2.3                         | 0.2                    | 12.5               | 28.0          |
| S.D.       |             | 7.1           |     | 2.6                    |                    |                  | 17.7             | 1.3                 | 1.0                         | 0.4                    | 6.2                | 1.4           |

12 deficits in routine neurological examination.

13

#### 14 **Clinical testing procedures**

15 The Hamilton rating scale for depression<sup>18</sup> and the Mini-Mental state examination<sup>19</sup> were used to  
 16 quantify the affective and general cognitive status, respectively, with pragmatic and established

1 tests. Motor features in patients were evaluated with the Unified Parkinson Disease Rating Scale  
2 (UPDRS, part III).<sup>20</sup> Further clinical assessments are listed in table 1.

3 To investigate eyeblink function we used the blink reflex (BR) and its R2 recovery cycle  
4 detailed elsewhere.<sup>12 21 22</sup> In brief, a single electrical stimulation of the supraorbital nerve (duration:  
5 0.2 ms) elicits an early unilateral (R1) and a late bilateral (R2) blink response. Paired-pulse  
6 supraorbital stimulation probes brainstem interneuronal excitability and yields an inhibition of the  
7 R2 of the second stimulus. We used interstimulus intervals (ISIs) of 100 ms, 300 ms and 600 ms on  
8 both sides. For EBCC we stimulated the side in which amplitudes and latencies were within or close  
9 to the normal range or arbitrarily the right supraorbital nerve if no side-differences were found.

### 11 **EBCC-implicit learning**

12 The procedures were virtually identical to and detailed in the earlier studies from our group.<sup>12 14</sup> In  
13 brief, an unconditioned stimulus, i.e. an electric pulse over the supraorbital nerve, invariably  
14 induces an eyeblink reflex. It is paired with a preceding conditioned stimulus, i.e. a tone, which by  
15 itself may elicit early startle responses (so called alpha blinks, within 200 ms after the tone). With  
16 repeated presentation of the tone and the electric pulse, a conditioned eyeblink response is expected  
17 to occur before the onset of the electrical stimulus. In the current study, the tone (conditioned  
18 stimulus, CS, 400 ms duration) was generated by a custom built sound generator (Department of  
19 Electronic Engineering, University of Goettingen) and presented via earphones (Cherry Inc., Japan)  
20 at an intensity perceived as very loud by each subject, usually 80 dB. A brief electrical stimulus to  
21 the supraorbital nerve eliciting a blink reflex served as unconditioned stimulus (UCS). We tested the  
22 EBCC with a two different interstimulus intervals between the end of the tone and the beginning of  
23 the electric pulse, either ISI 0 ms (delay paradigm) or 600 ms (trace paradigm), in randomized order.  
24 For each paradigm we administered six learning blocks, each with CS and UCS in trials 1-9, UCS  
25 only in trial 10 (to control for random blinks) and CS only in trial 11 (to test for a persistent learning

1 effect). To control for extinction of learned responses a seventh block consisted of 11 trials with CS  
2 only.<sup>23</sup> The intertrial interval was randomized between 10 and 30 seconds.

3 Electromyographic (EMG) activity was recorded using silver-silverchloride cup electrodes  
4 fixed with adhesive tape over the lower eyelid (active electrode) and over the ipsilateral temple  
5 (reference electrode); with a sampling rate of 10 kHz.<sup>12 14</sup> EMG signals were fed into a recording  
6 device and filtered at 100 Hz and 5 kHz (SynAmps, Neuroscan Inc, Virginia, USA). To detect any  
7 ongoing muscular activity we recorded 400 ms before and 1600 ms after CS onset.

### 9 **Serial reaction time task (SRTT)**

10 The SRTT is established as a test of implicit learning.<sup>12 24</sup> Subjects were sitting in front of a  
11 computer screen, and were told that single asterisks would appear in one out of four positions on a  
12 computer screen. They were instructed to press a marked key on a computer keyboard that was  
13 underneath the position of the asterisk on the screen. The asterisks were presented in three random  
14 blocks (blocks 1, 2, 7) and four identical sequence blocks (blocks 3-6), in each of which a sequence  
15 of 10 elements (CBDABDCBA) was presented 10 times. After each block subjects were asked to  
16 repeat the last 10 asterisk positions manually on the computer keyboard, which may have  
17 accentuated explicit aspects of the task.<sup>25 26</sup> We analyzed reaction time, errors and number of  
18 correctly repeated parts of the sequence. This test was difficult for many patients: Only 6 patients  
19 completed the test as required, one patient discontinued after block 1 and was excluded from the  
20 analysis. Two others discontinued after block 4, one after block 3. To enable some kind of statistical  
21 analysis, the result that these patients reached in their last sequence block was carried forward to the  
22 following sequence blocks, and the result of the second random block was assumed for block 7. One  
23 patient apparently responded with random typing to the letters presented and was therefore excluded  
24 from the analysis.

1  
2  
3  
4  
5  
6  
7  
8  
9  
10  
11  
12  
13  
14  
15  
16  
17  
18  
19  
20  
21  
22  
23  
24  
25  
26  
27  
28  
29  
30  
31  
32  
33  
34  
35  
36  
37  
38  
39  
40  
41  
42  
43  
44  
45  
46  
47  
48  
49  
50  
51  
52  
53  
54  
55  
56  
57  
58  
59  
60

## 1 Comparison of MSA patients with PSP and IPD patients studied earlier

2 While clearly retrospective, we have taken the liberty to compare the MSA patients results obtained  
3 here with the group of PSP patients that we studied in 2001<sup>14</sup> and a subgroup of IPD patients  
4 studied in 1999 with identical electrophysiological methods (numbers 1-4 and 6-11 according to  
5 Table 1 in<sup>12</sup>, selected to match as good as possible the current MSA group with regard to the disease  
6 severity (according to UPDRS part III), even though retrospective matching based in part on  
7 different scales used in different laboratories is certainly not perfect. Demographical data are cited  
8 in table 2. In figure 1, 2 and 4, data from these IPD and PSP patients are given in dashed lines.

Table 2

| Nr.  | group | Age    |     | Duration<br>[year] | UPDRS<br>Max=108 | BDI<br>Max=63 | MMS<br>Max=30 | MDRS<br>Max=144 |
|------|-------|--------|-----|--------------------|------------------|---------------|---------------|-----------------|
|      |       | [year] | Sex |                    |                  |               |               |                 |
| 1    | C     | 57     | m   | -                  | -                | 2             |               | 144             |
| 2    | C     | 60     | f   | -                  | -                | 9             |               | 142             |
| 3    | C     | 50     | m   | -                  | -                | 0             |               | 141             |
| 4    | C     | 64     | f   | -                  | -                | 0             |               | 142             |
| 5    | C     | 58     | m   | -                  | -                | 1             |               | 138             |
| 6    | C     | 73     | m   | -                  | -                | 6             |               | 134             |
| 7    | C     | 49     | f   | -                  | -                | 0             |               | 143             |
| 8    | C     | 45     | m   | -                  | -                | 1             |               | 144             |
| 9    | C     | 53     | m   | -                  | -                | 1             |               | 142             |
| 10   | C     | 73     | f   | -                  | -                | 11            | 30            |                 |
| 11   | C     | 72     | f   | -                  | -                | 0             | 30            |                 |
| Mean |       | 59.5   |     |                    |                  | 2.6           |               |                 |
| S.D. |       | 10.0   |     |                    |                  | 3.6           |               |                 |
| 1    | IPD   | 69     | f   | 2                  | 45               | 11            |               | 138             |
| 2    | IPD   | 64     | f   | 6                  | 39               | 15            |               | 143             |
| 3    | IPD   | 62     | m   | 5                  | 21               | 9             |               | 132             |
| 4    | IPD   | 45     | m   | 6                  | 28               | 5             |               | 141             |
| 5    | IPD   | 47     | m   | 7                  | 31               | 6             |               | 139             |
| 6    | IPD   | 49     | m   | 7                  | 25               | 6             |               | 140             |
| 7    | IPD   | 64     | m   | 9                  | 47               | 11            |               | 135             |
| 8    | IPD   | 63     | m   | 8                  | 16               | 11            |               | 141             |
| 9    | IPD   | 61     | m   | 5                  | 33               | 8             |               | 143             |
| 10   | IPD   | 50     | m   | 3                  | 44               | 11            |               | 143             |
| Mean |       | 57.4   |     | 5.8                | 32.9             | 9.3           |               | 139.5           |
| S.D. |       | 8.7    |     | 2.1                | 10.7             | 3.1           |               | 3.7             |
| 1    | PSP   | 54     | m   | 2                  | 22               | 6             | 30            | 127             |
| 2    | PSP   | 69     | m   | 9                  | 34               | 0             | 28            | 110             |
| 3    | PSP   | 65     | f   | 2                  | 44               | 13            | 28            | 107             |
| 4    | PSP   | 57     | f   | 3                  | 30               | 35            | 30            | 135             |
| 5    | PSP   | 66     | m   | 2                  | 30               | 13            | 28            | 135             |
| 6    | PSP   | 59     | m   | 6                  | 50               | 4             | 22            | 100             |
| 7    | PSP   | 68     | f   | 4                  | 43               | 50            | 18            | 116             |
| 8    | PSP   | 63     | m   | 5                  | 54               | *             | 23            | 112             |
| Mean |       | 62.6   |     | 4.1                | 38.4             | 17.3          | 25.9          | 117.8           |
| S.D. |       | 5.4    |     | 2.5                | 11.1             | 18.4          | 4.4           | 13.1            |

## Data analysis

UPDRS scores in the patient groups, and age in all four groups, were compared using factorial ANOVAs with group (three or four levels) as between-subject factor. R2 latencies were measured off-line. For analysis of the blink reflex recovery cycle, we entered the R2 amplitudes of the second pulse normalized to the R2 amplitudes of the first pulse into a repeated measures analysis of variance (ANOVA) with “interstimulus interval” (three levels: 100; 300, 600 ms) as within subject factor and “group” (two levels: control and MSA; or four levels: control, MSA, IPD, PSP) as



1 between subject factor.<sup>12 21 22</sup> In the EBCC, EMG bursts were regarded as present if their peak-to-  
2 peak amplitude exceeded baseline noise by at least 1.5 fold and reached at least 50  $\mu$ V. They were  
3 counted as alpha-blinks, i.e. startle responses, or conditioned responses (CRs) if they occurred  
4 within the appropriate time window (alpha blinks: within 200ms after onset of tone (CS); CRs:  
5 within 200 ms before electrical stimulus (UCS)). For the tone-alone-trials we extended the time  
6 window until 300 ms after the end of the UCS to detect delayed CRs.<sup>27</sup> Random blinks were  
7 counted as EMG bursts occurring in the CR time window in the absence of a CS, i.e. in the UCS  
8 only trials. Their occurrence rate was reported numerically. We analyzed the percentage of  
9 conditioned eyeblink responses repeated measures ANOVAs with “block” (six levels: blocks 1-6)  
10 as within subject factor and “group” (two levels: control and MSA; or four levels: control, MSA,  
11 IPD, PSP) and “paradigm” (two levels: delay versus trace) as between subject factors. In addition,  
12 we repeated the ANOVAs for conditioned eyeblink responses with the individual average alpha  
13 blink rate across blocks 1-6 as covariate. We calculated separate repeated measures ANOVAs for  
14 the tone alone trials (trial 11, block 1-6), with “block” (six levels: blocks 1-6) as within subject  
15 factor and “group” (two levels: control and MSA; or four levels: control, MSA, IPD, PSP) and  
16 “paradigm” (two levels: delay versus trace) as between subject factors. For alpha blink rate, we  
17 calculated a repeated-measures ANOVA with “block” (seven levels: blocks 1-6 and CS only block)  
18 as within subject factor and “group” (two levels: control and MSA; or four levels: control, MSA,  
19 IPD, PSP) and “paradigm” (two levels: delay versus trace) as between subject factors.

20 For SRTT, we analyzed reaction time, accuracy errors and retrieval using separate repeated  
21 measures ANOVAs with “block” (seven levels: blocks 1-7) as within subject factor and “group”  
22 (two levels: control and MSA; or four levels: control, MSA, IPD, PSP) as between subject factor.  
23 Post-hoc, we compared the effect change between from the last sequence block 6 to random block  
24 7, which is considered a measure of implicit learning, within group and with uncorrected, two-tailed  
25 t-tests.

1 In all analyses, Mauchly's sphericity test was performed and Greenhouse–Geisser correction  
2 was applied when necessary. The level of significance was set at  $p < 0.05$ . Post-hoc t-tests were  
3 calculated for the four-group comparisons and Bonferroni-corrected. A correlation between two  
4 parameters was determined by calculating Pearson's correlation coefficient and was reported if it  
5 was higher than 0.75 or lower than -0.75. The results are given as mean values  $\pm$  one standard  
6 deviation.

7

## 8 RESULTS

### 9 Rating scales

10 Details of age, sex, disease duration, L-Dopa response and rating scales of MSA patients are  
11 displayed in **table 1**. UPDRS scores for motor impairment placed the patients in an intermediately  
12 impaired range. The Hamilton depression score revealed mild depressive symptoms (mean  $12.5 \pm 6.2$   
13 out of 69 points) and the Mini-Mental State scored between 26 and 30 points (mean  $28.0 \pm 1.4$ )  
14 indicating mild cognitive impairment in more than half of the patients. These results are comparable  
15 to the IPD and PSP groups reported earlier.<sup>12 14</sup> The UPDRS score did not differ between the three  
16 patient groups (factorial ANOVA; no effect of group, no post-hoc difference on Bonferroni-  
17 corrected t-tests); in addition, all four groups did not differ with regard to age.

18

### 19 Blink reflex pathways

20 Blink reflex responses in MSA patients showed normal latencies (ipsilateral R1:  $11.6 \pm 1.0$  ms,  
21 ipsilateral R2:  $31.5 \pm 4.9$  ms contralateral R2:  $34.4 \pm 4.1$  ms). An R2 recovery cycle could be obtained  
22 in all patients (**figure 1**) with no significant side difference between the ipsi- and contralateral R2  
23 recovery. MSA patients showed significantly less R2 inhibition compared to the control group  
24 (repeated-measures ANOVA MSA-controls, effect of group,  $F(1, 20) = 15.0$ .  $p = 0.001$ ).

25

26

-- Please insert fig. 1 about here --

### Conditioned eyeblink responses

All MSA patients showed few random blinks as assessed by the UCS only trials ( $3.0 \pm 6.7$  % across both paradigms). The conditioned responses (CRs) were first analyzed for block 1-6 excluding the tone alone trials (see below). In either paradigm MSA patients showed significantly fewer CRs than the control group (**figure 2**; repeated-measures ANOVA MSA-control, effect of group,  $F(1, 39) = 37.1$ ,  $p < 0.0001$ ; effect of block,  $F(3.4, 39) = 7.0$ ,  $p < 0.0001$ ; interaction of group by block,  $F(3.4, 266) = 3.325$ ,  $p = 0.017$ , no main effect of paradigm). Adding the rate of alpha blinks as covariate to the ANOVA did not abolish the effect of group ( $F(1, 38) = 31.5$ ,  $p < 0.0001$ ).

These results were supported by a separate analysis of the tone alone trials (trial 11, block 1-6), in which the MSA group yielded an average number of CRs of  $14 \pm 17$  % in the delay and  $12 \pm 17$  % in the trace paradigm, which was significantly less than the control group with  $73 \pm 23$  % and  $55 \pm 27$  % of CRs respectively (ANOVA MSA-control, effect of group,  $F(1, 37) = 59.1$ ,  $p < 0.0001$ ). There was again no main effect of paradigm, i.e. trace and delay paradigm did not differ from each other.

~~Considering the MSA patients only, there was no difference in the occurrence of CRs between MSA P and MSA C patients (ANOVA, effect of MSA subtype,  $F(1, 17) = 2.5$ ,  $p = 0.13$ ).~~

-- Please insert fig. 2 about here -

### Alpha Blinks

In either paradigm MSA patients tended to show less alpha blinks than controls (repeated measures ANOVA, effect of group  $F(1, 38) = 4.0$ ,  $p = 0.054$ ; **figure 3**). The mean percentage of alpha blinks across all blocks in MSA patients was  $17.6 \pm 4.6$  % in the delay and  $14.4 \pm 4.1$  % in the trace paradigm, for control subjects  $31.5 \pm 11.1$  % and  $35.2 \pm 11.3$  % respectively. There were significantly more alpha blinks in earlier blocks than in late blocks for both paradigms (effect of block,  $F(4.3,$

1 163.7)=8.5,  $p<0.0001$ ). ~~Considering the MSA patients only, there was no statistically significant~~  
2 difference in the occurrence of alpha blinks between MSA-P and MSA-C patients.  
3

4 -- Please insert fig. 3 about here --  
5

## 6 **Serial reaction time task (SRTT)**

### 7 *Reaction time*

8 MSA patients showed longer reaction times compared with controls (repeated measures ANOVA  
9 MSA-control, effect of group,  $F(1,18)=20.2$ ,  $p<0.0001$ ; and a trend for an interaction of group by  
10 block,  $F(1.52, 27.34)=2.77$ ,  $p=0.10$ , **figure 4A**). In both groups reaction times decreased from block  
11 1 to the sequence blocks 3, 4, 5 and 6 (effect of block,  $F(1.52, 27.34)=5.5$ ,  $p=0.016$ ). The reaction  
12 time increase from sequence block 6 to random block 7, which is considered a measure of implicit  
13 learning, was significant in the control group only (t-test  $p<0.01$ ; MSA  $p=0.1$ ).  
14

15 -- Please insert fig. 4 about here --  
16

### 17 *Accuracy errors*

18 The average error rate of MSA patients across blocks was  $19.7\pm 4.2\%$ , which is significantly higher  
19 compared to controls with a rate of  $2.6\pm 0.8\%$  (repeated measures ANOVA MSA-control, effect of  
20 group,  $F(1,18)=10.1$ ,  $p=0.005$ ). In both groups error rates decreased from the first random to the  
21 sequence blocks (effect of block,  $F(3.37, 42.66)=3.9$ ,  $p=0.022$ ) and tended to increase between the  
22 last sequence block and the random block 7 without being significant.  
23

### 24 *Retrieval of sequence*

25 There was no significant difference between MSA patients and controls in the measures of sequence  
26 detection (manual sequence retrieval, ANOVA MSA-control, effect of group,  $F(1,18)=0.7$ ,  $p=0.42$ ).  
27  
28  
29  
30  
31  
32  
33  
34  
35  
36  
37  
38  
39  
40  
41  
42  
43  
44  
45  
46  
47  
48  
49  
50  
51  
52  
53  
54  
55  
56  
57  
58  
59  
60

1 Both groups remembered more items of the sequence in post block reproduction of the last 10 items  
2 during the course of the experiment (ANOVA, effect of block,  $F(3.58, 64.48)=31.0, p<0.001$ ). A  
3 small percentage of repetition was seen even before the sequence was presented, which indicates the  
4 baseline guessing rate (**figure 4B**).

### 6 **Correlation analyses for MSA patients**

7 We did not find a significant correlation between the average number of CRs across block 3-6  
8 (steady state) and the duration of disease, the Hamilton scale score, the MMST, the motor  
9 examination of the UPDRS, the cerebellar or autonomic impairment as assessed by the scores (see  
10 table 1) for either paradigm. The percentage of manual retrieval in the SRTT did not correlate with  
11 any of these parameters either.

### 13 **Retrospective comparison of all patient groups (MSA, PSP, IPD) and the control group**

14 In the blink reflex recovery cycle, the R2 inhibition was not different between the patient groups  
15 (figure 1). For the EBCC paradigms, the lack of eyeblink conditioning in MSA patients was similar  
16 to the PSP group and differed significantly from the increasing occurrence of CRs in IPD patients  
17 and controls (ANOVA, effect of group,  $F(3,63)=23.2, p<0.0001$ ; interaction of group by block,  
18  $F(11.1, 233.0)=3.6, p<0.0001$ ; figure 2). Post-hoc t-test with Bonferroni correction confirmed a  
19 difference between MSA patients and PD patients, and between MSA patients and control subjects.  
20 Adding the rate of alpha blinks as covariate did not abolish the effect of group ( $F(1, 32)= 16.7,$   
21  $p<0.0001$ ). Also in the tone alone trials, MSA and PSP patients showed fewer CRs than the IPD and  
22 control groups (ANOVA, effect of group,  $F(3,64)=19.0, p<0.0001$ ; interaction of group by block,  
23  $F(15,320)=1.8, p=0.04$ ). MSA and PSP groups both showed fewer alpha blinks than IPD patients  
24 and controls (ANOVA, effect of group,  $F(3,61)=3.5, p=0.02$ ; interaction of group by block  
25 ( $F(12.73, 259.0)=2.0, p=0.025$ ; see figure 3). However, with post-hoc, Bonferroni-corrected t-tests  
26 these differences were not significant.

1 For the differentiation of MSA and PSP from IPD we considered the mean percentage of CRs  
2 in the steady state part of the EBCC learning curve (blocks 3-6). The mean percentage of CRs  
3 allows a non-overlapping separation of the MSA and PSP groups from IPD in the trace paradigm  
4 with a cutoff at 26% (**figure 5**). In the delay paradigm, the separation between groups was less  
5 complete. Whereas all PSP patients exhibited less than 26% of CRs, the fraction of MSA patients  
6 with values equal or below 26% was 0.91. This corresponds to sensitivity values for the separation  
7 of PSP and MSA from IPD of 100% and 91%, respectively. If the specificity is defined as the  
8 fraction of IPD patients with CRs values above 26%, the specificity in the delay paradigm is 75%.  
9 As reported above, the sensitivity and specificity values for the trace paradigm are 100%. The  
10 slightly better performance of IPD patients<sup>13</sup> as compared to controls was not significant.

11  
12 -- Please insert fig. 5 about here --  
13

14 In the SRTT, MSA patients showed significantly longer reaction times than the IPD patients,  
15 but no significant difference compared to the PSP group (ANOVA: effect of group  $F(3,30)=7.4$ ,  
16  $p=0.001$ ; see figure 4). With regard to the error rate, MSA patients performed again very similar to  
17 the PSP patients, who showed  $19.5\pm 1.8\%$  accuracy errors, but significantly worse than the IPD  
18 patients (error rate  $4.8\pm 1.7\%$ ; ANOVA, effect of group,  $F(3,32)=6.1$ ,  $p=0.002$ ). The sequence recall  
19 measurements revealed no statistically significant differences between groups.

## 20 21 **DISCUSSION**

22 The differentiation of IPD and atypical Parkinsonian syndromes (MSA, PSP) constitutes a challenge  
23 for neurologists, as the motor symptoms often present very similarly, in particular in the early  
24 stages. Additional markers such as imaging have been evaluated,<sup>28 29</sup> but these provide insufficient  
25 sensitivity values or are technically challenging. In addition, macroscopically discernible structural  
26 changes as detectable by MRI are likely to occur some time after functional loss has begun.

1 Therefore functional tests might be better suited because they reveal deficits before discernible  
2 structural changes occur. In this study we focus on the differential learning abilities tested by  
3 eyeblink conditioning (EBCC) and a serial reaction time task (SRTT). First, the results of the MSA  
4 patients will be discussed, followed by a comparison with PSP and the putative impact for  
5 differentiation from IPD.

6 The MSA patients showed severely impaired implicit learning in the trace as well as in the  
7 delay eyeblink conditioning paradigm, with standard deviations in the range of other studies,<sup>10 30</sup>  
8 whereas non-learning associated blink reflex latencies as indicators of oculomotor pathways were  
9 normal.

10 Histopathological alterations in both subtypes of MSA include the substantia nigra, putamen,  
11 descending and ascending fiber tracts of the motor system, olivary and pontine nuclei, brainstem-  
12 cerebellar circuits as well as cerebellar structures (hemispheres and vermis).<sup>31-33</sup> This has been  
13 confirmed *in vivo* by diffusion tensor imaging of white matter microstructure.<sup>34</sup> We suggest that  
14 damage of cerebellar structures and associated brainstem-cerebellar circuits are responsible for the  
15 failure of EBCC learning in MSA patients. This assumption is supported by the findings of impaired  
16 EBCC in patients with cerebellar damage,<sup>27 35-37</sup> positron-emission tomography (PET)  
17 measurements in healthy humans showing changes in glucose metabolism in the cerebellum and  
18 pons during EBCC<sup>23 38</sup> as well as in experiments studying the influence of selective  
19 pharmacological blockade of cerebellar input on EBCC in rabbits.<sup>39</sup> Most patients in our study were  
20 clinically characterized as MSA-P and not MSA-C. However, the failure in blink reflex acquisition  
21 in both groups points to a subclinical cerebellar involvement in MSA-P, which is in accordance  
22 with the histopathological studies.<sup>32 33</sup> EBCC therefore seems to detect cerebellar involvement at a  
23 subclinical stage.

24 In addition to the cerebellum, several studies indicate that acquisition of CR in the trace  
25 paradigm depends on forebrain areas such as the hippocampus or prefrontal cortex, in particular for  
26 longer interstimulus intervals.<sup>40 41</sup> In our study, the failure of CR acquisition in MSA patients was

1 slightly more pronounced in the trace compared to the delay paradigm. Therefore, lesions of the  
2 frontal lobe, which have been suggested by neuropsychological testing<sup>6 42</sup> and confirmed  
3 histopathologically in a variety of MSA cases,<sup>43 44</sup> may have contributed to impaired EBCC  
4 acquisition in the trace paradigm.

5 An alternative explanation that was brought up by an anonymous reviewer is that the tone may  
6 be a less salient CS to the MSA patients than to the control group. The reduced number of alpha  
7 blinks would support this assumption. Following that very elegant line of thought, the EBCC group  
8 difference between MSA patients and control subjects would have to do less with implicit learning  
9 and more with responsiveness and associative processes related to external stimuli. While this may  
10 have some relevance, adding the number of alpha blinks to the ANOVAs on conditioned eyeblink  
11 responses did not abolish the between-group differences.

12 In the SRTT the MSA patients showed severe impairment in terms of prolonged reaction time,  
13 high error rate and, in some patients, early discontinuation due to fatigue and exhaustion. In contrast  
14 to the control group they showed no significant reaction time increase between block 6 (random)  
15 and 7 (sequence) and this is indicative of implicit learning deficits. On the other hand they showed  
16 good performance on the parameters of sequence recall (explicit learning). This preservation of  
17 SRTT explicit learning parts may be explained by the relative preservation of posterior association  
18 (temporal and parietal) cortex and hippocampus in MSA. It has to be interpreted with some caution,  
19 though, given limitations of spatial working memory in MSA.<sup>42</sup> However, the validity of the SRTT  
20 learning results is limited by the discontinuation of patients and our “last observation carried  
21 forward approach” (see Methods). In addition, the patients’ wide range of motor impairment, which  
22 may interfere with the motor part of the task, and the fact that sequence learning and movement  
23 preparation seem to share similar attentional and working memory resources<sup>45</sup> have to be  
24 considered. Therefore the SRTT seems to be inappropriate to assess learning abilities in MSA  
25 patients. This is in contrast to the EBCC, which is independent of the motor performance of



1 patients. Furthermore, EBCC circuits are located anatomically closer to the affected brainstem  
2 regions.

3 With all the limitations of such a retrospective comparison of data acquired in different patient  
4 groups by the same authors, the implicit learning impairment in MSA patients as clearly revealed by  
5 the EBCC and with some limitation by the SRTT parallels the previously reported findings in PSP  
6 patients.<sup>14</sup> Interestingly, MSA and PSP are characterized by different histopathological alterations,  
7  $\alpha$ -synuclein positive inclusions versus tau-positive aggregations, which lead to presume different  
8 pathophysiological mechanisms. However, the common involvement of cerebellar structures in both  
9 diseases<sup>31 46</sup> seems to be responsible for the clinical phenomenology independent of the cellular  
10 mechanism.

11 In contrast to MSA and PSP, IPD patients show normal<sup>12</sup> or even enhanced<sup>13</sup> acquisition of  
12 conditioned responses in EBCC. EBCC may therefore contribute to distinguish IPD from these  
13 atypical Parkinsonian syndromes. As the development of cerebellar and related neuropathology in  
14 MSA or PSP often occurs prior to or even without clinical manifestation,<sup>33 46</sup> we propose impaired  
15 EBCC particularly in the trace paradigm as an early indicator of neurodegeneration of areas beyond  
16 those typically affected in IPD. However, as the retrospective synopsis is clearly limited, the pivotal  
17 questions of whether EBCC can serve as predictor for the development of typical or atypical disease  
18 and whether EBCC is a useful addition to imaging techniques in establishing an early differential  
19 diagnosis are unanswered yet and require further prospective investigation.

20

1  
2  
3  
4  
5  
6  
7  
8  
9  
10  
11  
12  
13  
14  
15  
16  
17  
18  
19  
20  
21  
22  
23  
24  
25  
26  
27  
28  
29  
30  
31  
32  
33  
34  
35  
36  
37  
38  
39  
40  
41  
42  
43  
44  
45  
46  
47  
48  
49  
50  
51  
52  
53  
54  
55  
56  
57  
58  
59  
60

## 1 Acknowledgements

2 We thank Prof. Mark Hallett for commenting on an earlier draft of the manuscript.

## 4 Funding

5 This work was supported by the Deutsche Forschungsgemeinschaft (DFG, grant SO 429/2-2  
6 (M.S.)), by the Bernstein Center for Computational Neuroscience (grant # 01GQ0432 (W.P.)) and  
7 by the University of Göttingen (Heidenreich von Siebold-Programm (F.v.L.)).

## 9 Contributors

10 All authors listed above fulfill all three International Committee of Medical Journal Editors  
11 (ICMJE) guidelines for authorship which are (1) substantial contributions to conception and design,  
12 acquisition of data or analysis and interpretation of data; (2) drafting the article or revising it  
13 critically for important intellectual content and (3) final approval of the version to be published.  
14 MSo, CT and WP conceived the study. MSch, FvL and MSo were responsible for obtaining the  
15 data. FvL and MSo conducted the data analysis. All authors contributed to decisions on the  
16 interpretation of results. FvL and MSo contributed to the drafting of the manuscript. CT and WP  
17 were responsible for editing and providing guidance on the paper. All authors were responsible for  
18 critically revising the paper. All authors approved the final version of the manuscript prior to  
19 submission.

20  
21 **Competing interests** None

22  
23 **Ethics approval** Ethics committee of the Medical Faculty of the University of Goettingen.

24  
25 **Data sharing statement** There are no additional data available.

1  
2  
3  
4  
5  
6  
7  
8  
9  
10  
11  
12  
13  
14  
15  
16  
17  
18  
19  
20  
21  
22  
23  
24  
25  
26  
27  
28  
29  
30  
31  
32  
33  
34  
35  
36  
37  
38  
39  
40  
41  
42  
43  
44  
45  
46  
47  
48  
49  
50  
51  
52  
53  
54  
55  
56  
57  
58  
59  
60  
1 REFERENCES

- 2 | 1. Kollensperger M, Geser F, Ndayisaba JP, [et al](#). Presentation, diagnosis, and  
3 management of multiple system atrophy in Europe: final analysis of the  
4 European multiple system atrophy registry. *Mov Disord* 2010;25(15):2604-12.
- 5 | 2. Gilman S, Wenning GK, Low PA, [et al](#). Second consensus statement on the  
6 diagnosis of multiple system atrophy. *Neurology* 2008;71(9):670-6.
- 7 | 3. Poewe W, Wenning G. The differential diagnosis of Parkinson's disease. *Eur J*  
8 *Neurol* 2002;9 Suppl 3:23-30.
- 9 | 4. Hughes AJ, Daniel SE, Ben-Shlomo Y, [et al](#). The accuracy of diagnosis of  
10 parkinsonian syndromes in a specialist movement disorder service. *Brain*  
11 2002;125(Pt 4):861-70.
- 12 | 5. Lange KW, Tucha O, Alders GL, [et al](#). Differentiation of parkinsonian syndromes  
13 according to differences in executive functions. *J Neural Transm*  
14 2003;110(9):983-95.
- 15 | 6. Burk K, Daum I, Rub U. Cognitive function in multiple system atrophy of the  
16 cerebellar type. *Mov Disord* 2006;21(6):772-6.
- 17 | 7. Robbins TW, James M, Owen AM, [et al](#). Cognitive deficits in progressive  
18 supranuclear palsy, Parkinson's disease, and multiple system atrophy in tests  
19 sensitive to frontal lobe dysfunction. *J Neurol Neurosurg Psychiatry*  
20 1994;57(1):79-88.
- 21 | 8. Kehagia AA, Barker RA, Robbins TW. Neuropsychological and clinical  
22 heterogeneity of cognitive impairment and dementia in patients with  
23 Parkinson's disease. *Lancet Neurol* 2010;9(12):1200-13.
- 24 | 9. Balas M, Balash Y, Giladi N, [et al](#). Cognition in multiple system atrophy:  
25 neuropsychological profile and interaction with mood. *J Neural Transm*  
26 2010;117(3):369-75.
- 27 | 10. Hoffland BS, Kassavetis P, Bologna M, [et al](#). Cerebellum-dependent associative  
28 learning deficits in primary dystonia are normalized by rTMS and practice.  
29 *Eur J Neurosci* 2013;2013(31):1-6.
- 30 | 11. Christian KM, Thompson RF. Neural substrates of eyeblink conditioning:  
31 acquisition and retention. *Learn Mem* 2003;10(6):427-55.
- 32 | 12. Sommer M, Grafman J, Clark K, [et al](#). Learning in Parkinson's disease: eyeblink  
33 conditioning, declarative learning, and procedural learning. *J Neurol*  
34 *Neurosurg Psychiatry* 1999;67(1):27-34.
- 35 | 13. Daum I, Schugens MM, Breitenstein C, [et al](#). Classical eyeblink conditioning in  
36 Parkinson's disease. *Mov Disord* 1996;11(6):639-46.
- 37 | 14. Sommer M, Grafman J, Litvan I, [et al](#). Impairment of eyeblink classical  
38 conditioning in progressive supranuclear palsy. *Mov Disord* 2001;16(2):240-  
39 51.
- 40 | 15. Soliveri P, Brown RG, Jahanshahi M, [et al](#). Learning manual pursuit tracking  
41 skills in patients with Parkinson's disease. *Brain* 1997;120 ( Pt 8)(Pt 8):1325-  
42 37.

- 1 16. Hwang EJ, Smith MA, Shadmehr R. Dissociable effects of the implicit and  
2 explicit memory systems on learning control of reaching. *Exp Brain Res*  
3 2006;173(3):425-37.
- 4 17. Tomlinson CL, Stowe R, Patel S, [et al.](#) Systematic review of levodopa dose  
5 equivalency reporting in Parkinson's disease. *Mov Disord* 2010;25(15):2649-  
6 53.
- 7 18. Hamilton M. A rating scale for depression. *J Neurol Neurosurg Psychiatry*  
8 1960;23:56-62.
- 9 19. Folstein MF, Folstein SE, McHugh PR. "Mini-mental state". A practical method  
10 for grading the cognitive state of patients for the clinician. *J Psychiatr Res*  
11 1975;12(3):189-98.
- 12 20. Fahn S, Elton R, Committee amotUD. *Recent developments in Parkinson's*  
13 *disease*. Florham Park, NJ: Macmillan Healthcare Information, 1987.
- 14 21. Sommer M, Wobker G, Ferbert A. Voluntary eyelid contraction modifies the  
15 blink reflex recovery cycle. *Acta Neurol Scand* 1998;98(1):29-35.
- 16 22. Kimura J. The blink reflex. In: Kimura J, editor. *Electrodiagnosis in diseases of*  
17 *nerve and muscle: principles and practice*. Philadelphia: Davis, F. A.,  
18 1989:307-331.
- 19 23. Molchan SE, Sunderland T, McIntosh AR, [et al.](#) A functional anatomical study of  
20 associative learning in humans. *Proc Natl Acad Sci U S A* 1994;91(17):8122-6.
- 21 24. Pascual-Leone A, Grafman J, Clark K, [et al.](#) Procedural learning in Parkinson's  
22 disease and cerebellar degeneration. *Ann Neurol* 1993;34(4):594-602.
- 23 25. Moissello C, Crupi D, Tunik E, [et al.](#) The serial reaction time task revisited: a  
24 study on motor sequence learning with an arm-reaching task. *Exp Brain Res*  
25 2009;194(1):143-55.
- 26 26. Bo J, Jennett S, Seidler RD. Working memory capacity correlates with implicit  
27 serial reaction time task performance. *Exp Brain Res* 2011;214(1):73-81.
- 28 27. Topka H, Valls-Sole J, Massaquoi SG, [et al.](#) Deficit in classical conditioning in  
29 patients with cerebellar degeneration. *Brain* 1993;116 ( Pt 4):961-9.
- 30 28. Mahlknecht P, Hotter A, Hussl A, [et al.](#) Significance of MRI in diagnosis and  
31 differential diagnosis of Parkinson's disease. *Neurodegener Dis*  
32 2010;7(5):300-18.
- 33 29. von Lewinski F, Werner C, Jorn T, [et al.](#) T2\*-weighted MRI in diagnosis of  
34 multiple system atrophy. A practical approach for clinicians. *J Neurol*  
35 2007;254(9):1184-8.
- 36 30. Holloway JL, Trivedi P, Myers CE, [et al.](#) Enhanced conditioned eyeblink  
37 response acquisition and proactive interference in anxiety vulnerable  
38 individuals. *Front Behav Neurosci* 2012;6(76).
- 39 31. Braak H, Rub U, Del Tredici K. Involvement of precerebellar nuclei in multiple  
40 system atrophy. *Neuropathol Appl Neurobiol* 2003;29(1):60-76.
- 41 32. Wenning GK, Tison F, Elliott L, [et al.](#) Olivopontocerebellar pathology in  
42 multiple system atrophy. *Mov Disord* 1996;11(2):157-62.

- 1 | 33. Ozawa T, Paviour D, Quinn NP, [et al.](#) The spectrum of pathological involvement  
2 | of the striatonigral and olivopontocerebellar systems in multiple system  
3 | atrophy: clinicopathological correlations. *Brain* 2004;127(Pt 12):2657-71.
- 4 | 34. Nair SR, Tan LK, Mohd Ramli N, [et al.](#) A decision tree for differentiating  
5 | multiple system atrophy from Parkinson's disease using 3-T MR imaging. *Eur*  
6 | *Radiol* 2013;10.
- 7 | 35. Gerwig M, Dimitrova A, Kolb FP, [et al.](#) Comparison of eyeblink conditioning in  
8 | patients with superior and posterior inferior cerebellar lesions. *Brain*  
9 | 2003;126(Pt 1):71-94.
- 10 | 36. Gerwig M, Haerter K, Hajjar K, [et al.](#) Trace eyeblink conditioning in human  
11 | subjects with cerebellar lesions. *Exp Brain Res* 2006;170(1):7-21.
- 12 | 37. Daum I, Schugens MM, Ackermann H, [et al.](#) Classical conditioning after  
13 | cerebellar lesions in humans. *Behav Neurosci* 1993;107(5):748-56.
- 14 | 38. Logan CG, Grafton ST. Functional anatomy of human eyeblink conditioning  
15 | determined with regional cerebral glucose metabolism and positron-emission  
16 | tomography. *Proc Natl Acad Sci U S A* 1995;92(16):7500-4.
- 17 | 39. Attwell PJ, Ivarsson M, Millar L, [et al.](#) Cerebellar mechanisms in eyeblink  
18 | conditioning. *Ann N Y Acad Sci* 2002;978:79-92.
- 19 | 40. Clark RE, Squire LR. Classical conditioning and brain systems: the role of  
20 | awareness. *Science* 1998;280(5360):77-81.
- 21 | 41. Takehara-Nishiuchi K, Kawahara S, Kirino Y. NMDA receptor-dependent  
22 | processes in the medial prefrontal cortex are important for acquisition and the  
23 | early stage of consolidation during trace, but not delay eyeblink conditioning.  
24 | *Learn Mem* 2005;12(6):606-14.
- 25 | 42. Robbins TW, James M, Lange KW, [et al.](#) Cognitive performance in multiple  
26 | system atrophy. *Brain* 1992;115 Pt 1:271-91.
- 27 | 43. Konagaya M, Konagaya Y, Sakai M, [et al.](#) Progressive cerebral atrophy in  
28 | multiple system atrophy. *J Neurol Sci* 2002;195(2):123-7.
- 29 | 44. Armstrong RA, Lantos PL, Cairns NJ. Multiple system atrophy: laminar  
30 | distribution of the pathological changes in frontal and temporal neocortex--a  
31 | study in ten patients. *Clin Neuropathol* 2005;24(5):230-5.
- 32 | 45. Marinelli L, Perfetti B, Moisello C, [et al.](#) Increased reaction time predicts visual  
33 | learning deficits in Parkinson's disease. *Mov Disord* 2010;25(10):1498-501.
- 34 | 46. Jellinger KA, Bancher C. Neuropathology. In: Litvan I, Agid Y, editors.  
35 | *Progressive supranuclear palsy*. New York: University Press, 1992:45-88.
- 36 | 47. Coblenz JM, Mattis S, Zingesser L. Presenile dementia. Clinical aspects and  
37 | evaluation of cerebrospinal fluid dynamics. *Archives of Neurology*  
38 | 1973;29:299-308.
- 39 | 48. Schmidt R, Freidl W, Fazekas F, [et al.](#) The Mattis Dementia Rating Scale:  
40 | normative data from 1,001 healthy volunteers. *Neurology* 1994;44(5):964-6.
- 41 | 49. Llebaria G, Pagonabarraga J, Kulisevsky J, [et al.](#) Cut-off score of the Mattis  
42 | Dementia Rating Scale for screening dementia in Parkinson's disease. *Mov*  
43 | *Disord* 2008;23(11):1546-50.

- 1 50. Beck AT, Steer RA, Garbin MG. Inventory for measuring depression. *Arch Gen*  
2 *Psychiatry* 1961;4:561-571.  
3  
4 51. Sommer M, Grafman J, Clark K, Hallett Met al. Learning in Parkinson's disease:  
5 eyeblink conditioning, declarative learning, and procedural learning. *J Neurol*  
6 *Neurosurg Psychiatry* 1999;67:27-34.  
7  
8  
9  
10

## 11 **Legends to tables and figures**

12 **Table 1:** Characteristics of the MSA patients. Type: Parkinsonian (MSA-P) or cerebellar (MSA-C)  
13 predominance; LED = L-Dopa equivalent dose, + indicates additional budipine medication, #  
14 additional anticholinergic medication; UPDRS = Unified Parkinson's disease rating scale, motor  
15 examination only (high number of points indicates high disability); MMS= Mini Mental State (30  
16 points are normal,  $\leq 26$  is usually considered as cognitive impairment). Cerebellar impairment was  
17 evaluated for ataxia (arm, leg), saccades and intention tremor (finger-nose test), autonomic  
18 impairment for postural faintness, syncopes, urinary incontinence, urinary retention, faecal  
19 incontinence and impotence (males only). Pyramidal tract impairment was scored for hyperreflexia  
20 and Babinski sign. Each item was scored if present with 1, otherwise 0. In the Hamilton scale a low  
21 score indicates few depressive symptoms. \*not investigated.  
22  
23  
24  
25  
26  
27  
28  
29  
30  
31  
32  
33  
34  
35  
36  
37  
38

39 **Table 2:** Characteristics of controls, IPD and PSP patients in part taken from earlier publications.<sup>12</sup>  
40  
41 <sup>14</sup> Dementia had been ruled out using the Mattis Dementia Rating scale (MDRS)<sup>47 48</sup>, where higher  
42 scores out of a maximum of 144 indicate better performance, with a cut-off  $\leq 123$  considered as  
43 cognitive impairment<sup>49</sup>. Depression had been assessed using the Beck Depression Inventory (BDI),  
44 where higher scores out of a maximum of 63 points indicate a more severe depressed state, and a  
45 score of 15 is regarded as cut off for a self report of mild depression.<sup>50 51</sup> \*not investigated. The  
46 MDRS was not available at the German study sites.  
47  
48  
49  
50  
51  
52  
53  
54  
55  
56  
57  
58  
59  
60

1 **Figure 1:** Blink reflex recovery cycle with interstimulus intervals of 100, 300 and 600 ms. In MSA  
2 patients, the inhibition of the ipsilateral R2 response to the second stimulus is weaker than in the  
3 control group. Data of MSA patients and controls are indicated as average value and single standard  
4 deviation. Data for IPD and PSP patients (dashed lines) were taken from our earlier studies using  
5 identical methods.<sup>12 14</sup>

6  
7 **Figure 2:** Conditioned eyeblink responses in two different paradigms: left, delay (interstimulus  
8 interval 0 ms), right, trace paradigm (interstimulus interval 600 ms). In both paradigms, the number  
9 of conditioned responses was significantly lower in MSA and PSP patients than in the control and  
10 IPD groups indicating impaired implicit learning. CS, conditioned stimulus (tone), UCS,  
11 unconditioned stimulus (electrical stimulation to the supraorbital nerve). Data of MSA patients and  
12 controls are indicated as average value and single standard deviation. Data for IPD and PSP patients  
13 (dashed lines) were taken from our earlier studies using identical methods.<sup>12 14</sup>

14  
15 **Figure 3:** Occurrence of ‘alpha-blinks’. These bursts are a startle reaction to the tone (CS) and are  
16 less frequent in MSA and PSP patients than in the control and IPD groups. Data for IPD and PSP  
17 patients were taken from our earlier studies using identical methods.<sup>12 14</sup> Data are indicated as  
18 average value and single standard deviation and were pooled for both paradigms.

19  
20 **Figure 4: A** Reaction time in a serial reaction time task (SRTT). An implicit learning effect is  
21 indicated by the reaction time increase between the last sequence block (6) and the following  
22 random block (7). **B** Explicit learning in the SRTT was tested after each block by manual retrieval  
23 of the sequence (repetition of the last 10 key presses) and revealed no significant difference between  
24 groups. Data are indicated as average value and single standard deviation. Data for IPD and PSP  
25 patients were taken from our earlier studies using identical methods.<sup>12 14</sup> Asterisks indicate a  
26 significant difference for the comparison of blocks 6 and 7 ( $p < 0.05$ , post-hoc t-test).

1  
2  
3  
4  
5  
6  
7  
8  
9  
10  
11  
12  
13  
14  
15  
16  
17  
18  
19  
20  
21  
22  
23  
24  
25  
26  
27  
28  
29  
30  
31  
32  
33  
34  
35  
36  
37  
38  
39  
40  
41  
42  
43  
44  
45  
46  
47  
48  
49  
50  
51  
52  
53  
54  
55  
56  
57  
58  
59  
60

1  
2 **Figure 5:** Overview of the mean percentage of conditioned eyeblink responses (CRs) across blocks  
3 3-6 in the EBCC paradigms in MSA patients and control subjects from this study and in IPD and  
4 PSP patients from earlier studies.<sup>12 14</sup> With the trace paradigm a complete separation between IPD  
5 and the atypical Parkinsonian syndromes MSA and PSP is achieved (cutoff 26%), whereas in the  
6 delay paradigm there is a small overlap between these groups. Overall, IPD patients perform slightly  
7 better than control subjects,<sup>13</sup> further enhancing the group distinction between IPD and atypical  
8 syndromes.



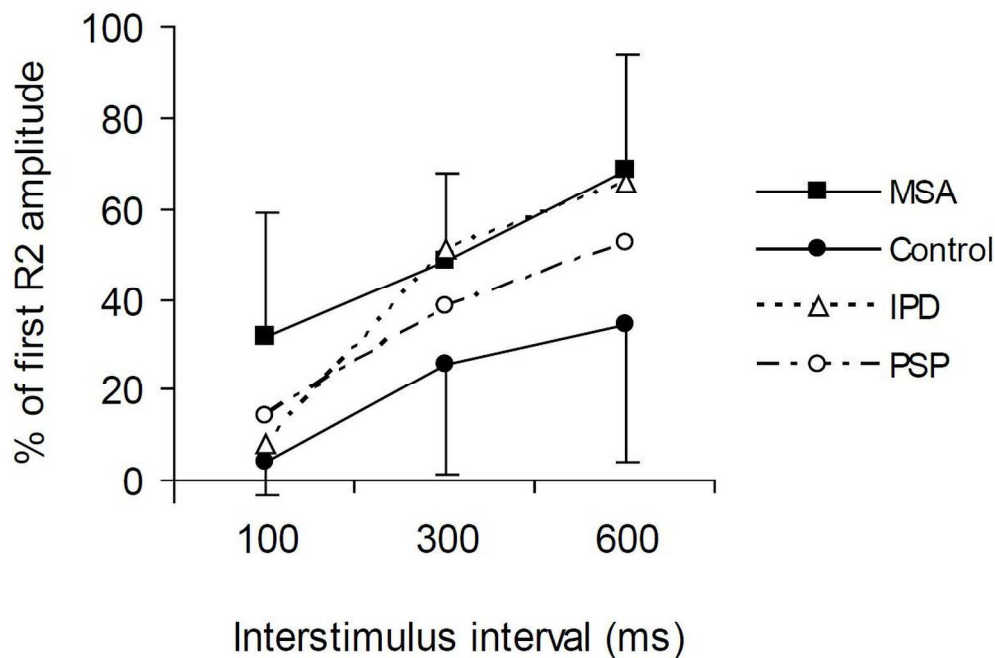

Blink reflex recovery cycle with interstimulus intervals of 100, 300 and 600 ms. In MSA patients, the inhibition of the ipsilateral R2 response to the second stimulus is weaker than in the control group. Data of MSA patients and controls are indicated as average value and single standard deviation. Data for IPD and PSP patients (dashed lines) were taken from our earlier studies using identical methods.  
321x215mm (300 x 300 DPI)

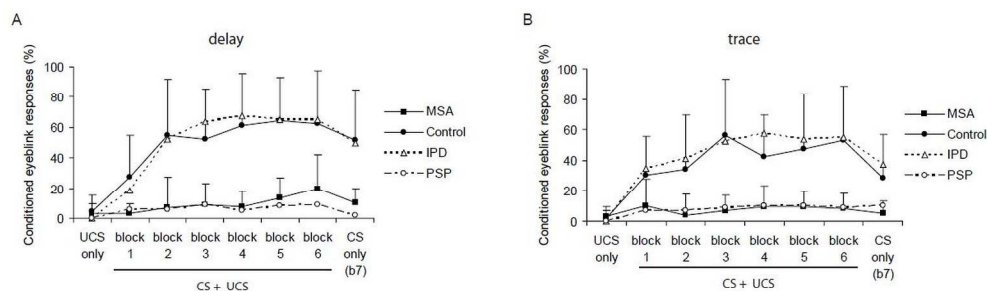

Figure 2, von Lewinski et al.

Conditioned eyeblink responses in two different paradigms: left, delay (interstimulus interval 0 ms), right, trace paradigm (interstimulus interval 600 ms). In both paradigms, the number of conditioned responses was significantly lower in MSA and PSP patients than in the control and IPD groups indicating impaired implicit learning. CS, conditioned stimulus (tone), UCS, unconditioned stimulus (electrical stimulation to the supraorbital nerve). Data of MSA patients and controls are indicated as average value and single standard deviation. Data for IPD and PSP patients (dashed lines) were taken from our earlier studies using identical methods.

322x156mm (300 x 300 DPI)

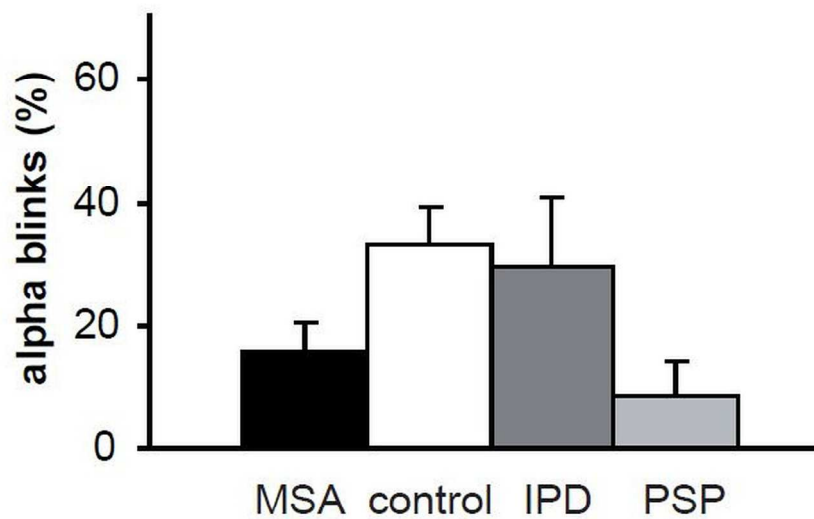

Figure 3, von Lewinski et al.

Occurrence of 'alpha-blinks'. These bursts are a startle reaction to the tone (CS) and are less frequent in MSA and PSP patients than in the control and IPD groups. Data for IPD and PSP patients were taken from our earlier studies using identical methods. Data are indicated as average value and single standard deviation and were pooled for both paradigms.  
193x205mm (300 x 300 DPI)

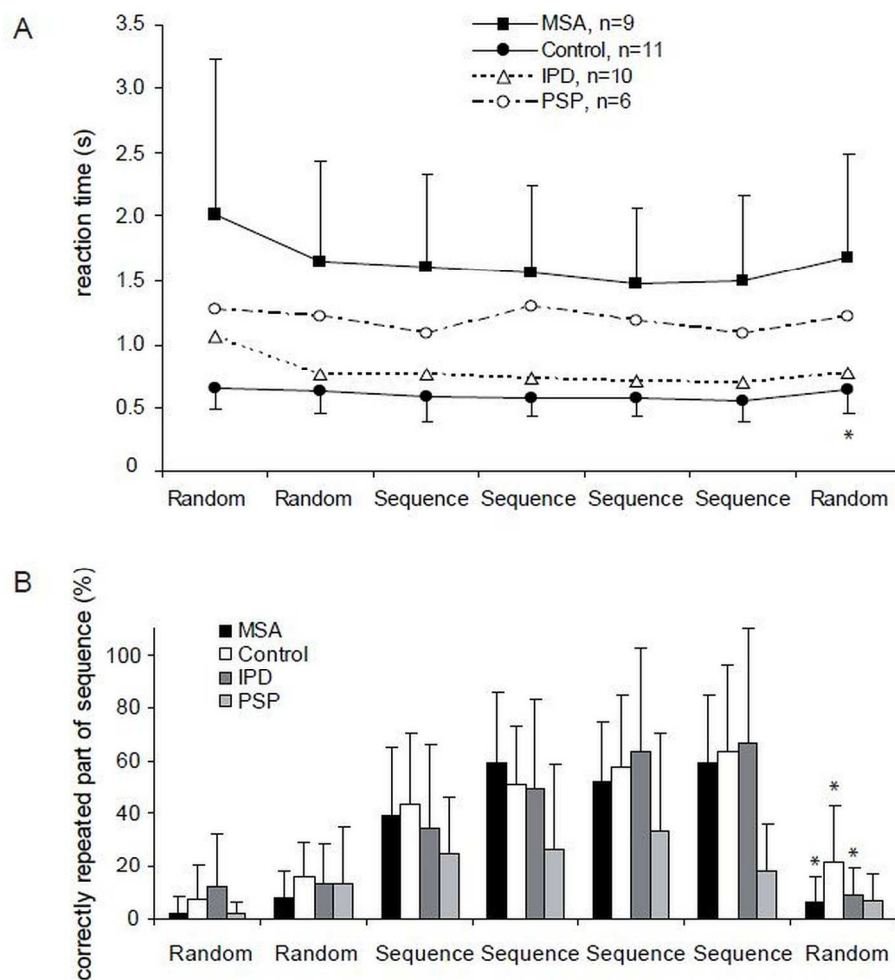

Figure 4, von Lewinski et al.

A Reaction time in a serial reaction time task (SRTT). An implicit learning effect is indicated by the reaction time increase between the last sequence block (6) and the following random block (7). B Explicit learning in the SRTT was tested after each block by manual retrieval of the sequence (repetition of the last 10 key presses) and revealed no significant difference between groups. Data are indicated as average value and single standard deviation. Data for IPD and PSP patients were taken from our earlier studies using identical methods.<sup>12 14</sup> Asterisks indicate a significant difference for the comparison of blocks 6 and 7 ( $p < 0.05$ )

189x226mm (300 x 300 DPI)

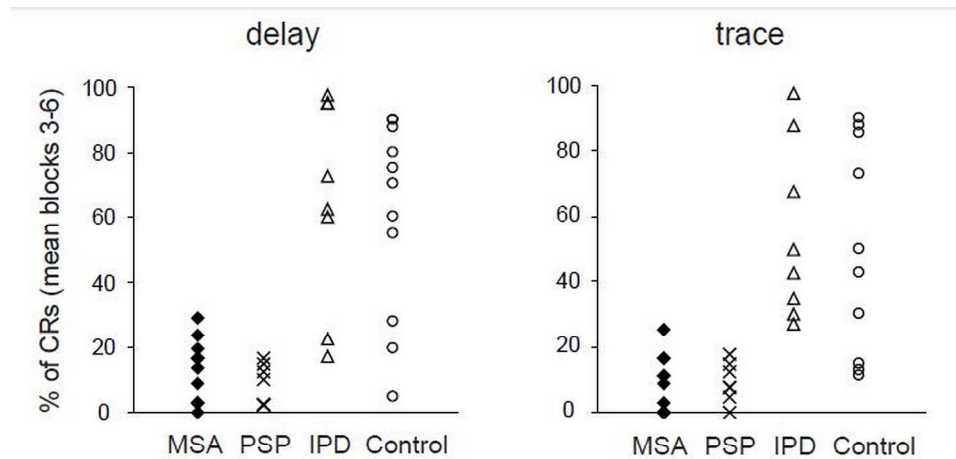

Figure 5, von Lewinski et al.

Overview of the mean percentage of conditioned eyeblink responses (CRs) across blocks 3-6 in the EBCC paradigms in MSA patients and control subjects from this study and in IPD and PSP patients from earlier studies. With the trace paradigm a complete separation between IPD and the atypical Parkinsonian syndromes MSA and PSP is achieved (cutoff 26%), whereas in the delay paradigm there is a small overlap between these groups. Overall, IPD patients perform slightly better than control subjects, further enhancing the group distinction between IPD and atypical syndromes.

187x234mm (300 x 300 DPI)



1  
2  
3  
4  
5  
6  
7  
8  
9  
10  
11  
12  
13  
14  
15  
16  
17  
18  
19  
20  
21  
22  
23  
24  
25  
26  
27  
28  
29  
30  
31  
32  
33  
34  
35  
36  
37  
38  
39  
40  
41  
42  
43  
44  
45  
46  
47  
48  
49  
50  
51  
52  
53  
54  
55  
56  
57  
58  
59  
60

1 **ABSTRACT**

2 **Objectives:** Learning as measured by eyeblink classical conditioning is preserved in patients with  
3 idiopathic Parkinson's disease, but severely affected in patients with progressive supranuclear palsy.

4 We here sought to clarify whether procedural learning is impaired in multiple system atrophy, and  
5 whether it may be helpful for the differentiation of Parkinsonian syndromes.

6 **Design:** We investigated learning using (1) eyeblink classical conditioning with a delay  
7 (interstimulus interval 0 ms) and a trace (600 ms) paradigm and (2) a serial reaction time task.

8 **Setting:** Participants were recruited from academic research centers.

9 **Participants:** 11 patients with multiple system atrophy and 11 healthy controls.

10 **Results:** Implicit learning in eyeblink classical conditioning (acquisition of conditioned responses)  
11 as well as the serial reaction time task measures of implicit learning (reaction time change) are  
12 impaired in multiple system atrophy patients as compared to controls, whereas explicit learning as  
13 measured by the sequence recall of the serial reaction time task is relatively preserved.

14 **Analysis:** We hypothesize that the MSA patients' learning deficits are due to lesions of cerebellar  
15 and connected brainstem areas.

16 **Conclusions:** A retrospective synopsis of these novel data on multiple system atrophy patients and  
17 groups of idiopathic Parkinson's disease patients and progressive supranuclear palsy patients  
18 studied earlier suggests that eyeblink classical conditioning may contribute to the early  
19 differentiation of atypical Parkinson syndromes from idiopathic Parkinson's disease. This  
20 hypothesis should be tested in a prospective trial.

1  
2  
3  
4  
5  
6  
7  
8  
9  
10  
11  
12  
13  
14  
15  
16  
17  
18  
19  
20  
21  
22  
23  
24  
25  
26  
27  
28  
29  
30  
31  
32  
33  
34  
35  
36  
37  
38  
39  
40  
41  
42  
43  
44  
45  
46  
47  
48  
49  
50  
51  
52  
53  
54  
55  
56  
57  
58  
59  
60

1 **ARTICLE SUMMARY:**

2 **Article focus:**

- 3 • We tested if the non-motor feature of procedural learning is impaired in patients afflicted with  
4 multiple system atrophy.  
5 • We studied the eyeblink classical conditioning and a serial reaction time task in 11 MSA  
6 patients and matched control subjects.

7  
8 **Key messages:**

- 9 • Blink reflex pathways were intact, but eyeblink conditioning was significantly impaired in  
10 MSA patients. By contrast, the serial reaction time task was difficult and inconclusive in  
11 these patients due to motor constraints impairing finger tapping.  
12 • A retrospective comparison with previously studied groups patients with idiopathic  
13 Parkinson's disease or Progressive Supranuclear Palsy points to a putative role of eyeblink  
14 conditioning in distinguishing typical from atypical Parkinsonian disorders.

15  
16 **Strength and limitations:**

- 17 • The study differentiates feasible and non-feasible assessments of procedural learning in  
18 multiple system atrophy.  
19 • The comparison to other patient groups is clearly retrospective and needs to be validated by a  
20 prospective trial.  
21



## 1 INTRODUCTION

2 Multiple system atrophy (MSA) is a progressive neurodegenerative disorder characterized by an  
3 absent or poorly levodopa responsive Parkinsonism, cerebellar dysfunction and autonomic failure.<sup>1</sup>  
4 A predominantly Parkinsonian (MSA-P) and a cerebellar subtype (MSA-C) are recognized. Despite  
5 the development of consensus criteria,<sup>2</sup> the differential diagnosis between MSA and other  
6 hypokinetic rigid syndromes, such as idiopathic Parkinson's disease (IPD) or progressive  
7 supranuclear palsy (Steele-Richardson-Olszewski syndrome, PSP), remains a clinical challenge.<sup>3 4</sup>

8 Recent years have seen an increasing focus on non-motor symptoms such as cognitive deficits  
9 in Parkinsonian disorders. Different patterns of cognitive impairment including deficits in executive  
10 function and learning abilities have been described.<sup>5-9</sup>

11 A well established task to study associative, procedural learning<sup>10</sup> is eyeblink classical  
12 conditioning (EBCC), which some regard as a model of implicit learning<sup>11</sup>. Previous studies have  
13 shown that learning as measured by EBCC is normal in patients with IPD, but, severely affected in  
14 patients with PSP.<sup>12-14</sup> In contrast to tracking or pointing tasks,<sup>15 16</sup> EBCC has the advantage not to  
15 depend on manual motor skills. Learning assessed by the serial reaction time task (SRTT) showed  
16 the implicit motor skill close to normal in IPD patients, whereas PSP patients were markedly  
17 impaired; in contrast, the SRTT sequence recall component as measure of explicit learning was  
18 largely preserved in both groups.<sup>12 14</sup> We sought to investigate whether implicit learning deficits are  
19 specific for PSP or present in MSA as well, thereby comparing the clinical feasibility of SRTT and  
20 of EBCC in this patient group.

## 22 METHODS

### 23 Subjects

24 11 MSA patients were recruited from the outpatient clinics in Munich and Göttingen between 1999  
25 and 2008 (**table 1**). The clinical diagnosis of "probable MSA" was established following consensus  
26 criteria.<sup>2</sup> 7 MSA patients were taking L-Dopa, two dopamine agonists (ropinirole, pramipexole),

1 one amantadine, one budipine, one biperiden, another metixen, and two were taking antidepressants.  
 2 L-Dopa equivalent doses (LEDs) were calculated according to Tomlinson and colleagues<sup>17</sup> except  
 3 for budipine, biperiden and metixen, where no conversion factor was given.

4 To rule out an immediate impact of medication on the patients' memory performance, the anti-  
 5 parkinsonian medication was discontinued on the morning of the day of the study. MSA patients  
 6 were compared with 11 healthy control subjects, **matched for age (t-test), and chosen for the absence**  
 7 **of neurodegenerative or any other neurological disease, and for the absence of intake of CNS-active**  
 8 **medication** (mean age 59.5±10.0 years, 6 male, 5 female). A subgroup was already involved in our  
 9 earlier published study (numbers 2,3,5,6,8,9,11,12,14 according to Table 2 in<sup>12</sup>). All participants  
 10 gave written informed consent; the research protocol was approved by the local ethics committee.  
 11 Neither the patients nor the control subjects had any sign of cranial nerve impairment or auditory

Table 1

| Pat<br>Nr. | MSA<br>Type | Age<br>[year] | Sex | Duratio<br>n<br>[year] | L-Dopa<br>response | LED<br>[mg]      | UPDRS<br>Max=108 | Cerebellar<br>Max=4 | Autonomic<br>Max=5[f], 6[m] | Pyramida<br>l<br>Max=2 | Hamilton<br>Max=69 | MMS<br>Max=30 |
|------------|-------------|---------------|-----|------------------------|--------------------|------------------|------------------|---------------------|-----------------------------|------------------------|--------------------|---------------|
| 1          | P           | 66            | F   | 9                      | Poor               | 0 <sup>+</sup>   | 50               | 0                   | 1                           | 0                      | 11                 | 27            |
| 2          | P           | 69            | M   | 4.5                    | Poor               | 125              | 20               | 0                   | 2                           | 0                      | 20                 | 30            |
| 3          | P           | 73            | M   | 8                      | Absent             | 255              | 16               | 0                   | 3                           | 0                      | 15                 | 28            |
| 4          | P           | 59            | F   | 1.5                    | Poor               | 125 <sup>#</sup> | 30               | 0                   | 2                           | 1                      | 16                 | 26            |
| 5          | P           | 71            | M   | 4                      | Absent             | 150              | 35               | 0                   | 4                           | 0                      | 6                  | 29            |
| 6          | P           | 75            | M   | 5                      | Modest             | 524              | 38               | 0                   | 3                           | 0                      | 6                  | 29            |
| 7          | P           | 75            | F   | 3                      | Poor               | 375              | 40               | 0                   | 3                           | 0                      | 10                 | 28            |
| 8          | P           | 58            | M   | 3                      | Poor               | 105 <sup>#</sup> | 18               | 0                   | 1                           | 0                      | 2                  | 30            |
| 9          | C           | 64            | M   | 2                      | Poor               | 900              | 69               | 2                   | 2                           | 0                      | 22                 | 27            |
| 10         | C           | 56            | M   | 2.5                    | *                  | 0                | 5                | 3                   | 1                           | 0                      | 16                 | 28            |
| 11         | C           | 60            | F   | 8                      | *                  | 0                | 30               | 3                   | 3                           | 1                      | 14                 | 26            |
| Mean       |             | 66.0          |     | 4.6                    |                    |                  | 31.9             | 0.7                 | 2.3                         | 0.2                    | 12.5               | 28.0          |
| S.D.       |             | 7.1           |     | 2.6                    |                    |                  | 17.7             | 1.3                 | 1.0                         | 0.4                    | 6.2                | 1.4           |

12 deficits in routine neurological examination.

13

#### 14 **Clinical testing procedures**

15 The Hamilton rating scale for depression<sup>18</sup> and the Mini-Mental state examination<sup>19</sup> were used to  
 16 quantify the affective and general cognitive status, respectively, with pragmatic and established

1 tests. Motor features in patients were evaluated with the Unified Parkinson Disease Rating Scale  
2 (UPDRS, part III).<sup>20</sup> Further clinical assessments are listed in table 1.

3 To investigate eyeblink function we used the blink reflex (BR) and its R2 recovery cycle  
4 detailed elsewhere.<sup>12 21 22</sup> In brief, a single electrical stimulation of the supraorbital nerve (duration:  
5 0.2 ms) elicits an early unilateral (R1) and a late bilateral (R2) blink response. Paired-pulse  
6 supraorbital stimulation probes brainstem interneuronal excitability and yields an inhibition of the  
7 R2 of the second stimulus. We used interstimulus intervals (ISIs) of 100 ms, 300 ms and 600 ms on  
8 both sides. For EBCC we stimulated the side in which amplitudes and latencies were within or close  
9 to the normal range or arbitrarily the right supraorbital nerve if no side-differences were found.

### 11 **EBCC-implicit learning**

12 The procedures were virtually identical to and detailed in the earlier studies from our group.<sup>12 14</sup> In  
13 brief, an unconditioned stimulus, i.e. an electric pulse over the supraorbital nerve, invariably  
14 induces an eyeblink reflex. It is paired with a preceding conditioned stimulus, i.e. a tone, which by  
15 itself may elicit early startle responses (so called alpha blinks, within 200 ms after the tone). With  
16 repeated presentation of the tone and the electric pulse, a conditioned eyeblink response is expected  
17 to occur before the onset of the electrical stimulus. In the current study, the tone (conditioned  
18 stimulus, CS, 400 ms duration) was generated by a custom built sound generator (Department of  
19 Electronic Engineering, University of Goettingen) and presented via earphones (Cherry Inc., Japan)  
20 at an intensity perceived as very loud by each subject, usually 80 dB. A brief electrical stimulus to  
21 the supraorbital nerve eliciting a blink reflex served as unconditioned stimulus (UCS). We tested the  
22 EBCC with a two different interstimulus intervals between the end of the tone and the beginning of  
23 the electric pulse, either ISI 0 ms (delay paradigm) or 600 ms (trace paradigm), in randomized order.  
24 For each paradigm we administered six learning blocks, **each** with CS and UCS in trials 1-9, UCS  
25 only in trial 10 (to control for random blinks) and CS only in trial 11 (to test for a **persistent** learning

1 effect). To control for extinction of learned responses a seventh block consisted of 11 trials with CS  
2 only.<sup>23</sup> The intertrial interval was randomized between 10 and 30 seconds.

3 Electromyographic (EMG) activity was recorded using silver-silverchloride cup electrodes  
4 fixed with adhesive tape over the lower eyelid (active electrode) and over the ipsilateral temple  
5 (reference electrode); with a sampling rate of 10 kHz.<sup>12 14</sup> EMG signals were fed into a recording  
6 device and filtered at 100 Hz and 5 kHz (SynAmps, Neuroscan Inc, Virginia, USA). To detect any  
7 ongoing muscular activity we recorded 400 ms before and 1600 ms after CS onset.

### 9 **Serial reaction time task (SRTT)**

10 The SRTT is established as a test of implicit learning.<sup>12 24</sup> Subjects were sitting in front of a  
11 computer screen, and were told that single asterisks would appear in one out of four positions on a  
12 computer screen. They were instructed to press a marked key on a computer keyboard that was  
13 underneath the position of the asterisk on the screen. The asterisks were presented in three random  
14 blocks (blocks 1, 2, 7) and four identical sequence blocks (blocks 3-6), in each of which a sequence  
15 of 10 elements (CBDABDCBA) was presented 10 times. After each block subjects were asked to  
16 repeat the last 10 asterisk positions manually on the computer keyboard, which may have  
17 accentuated explicit aspects of the task.<sup>25 26</sup> We analyzed reaction time, errors and number of  
18 correctly repeated parts of the sequence. This test was difficult for many patients: Only 6 patients  
19 completed the test as required, one patient discontinued after block 1 and was excluded from the  
20 analysis. Two others discontinued after block 4, one after block 3. To enable some kind of statistical  
21 analysis, the result that these patients reached in their last sequence block was carried forward to the  
22 following sequence blocks, and the result of the second random block was assumed for block 7. One  
23 patient apparently responded with random typing to the letters presented and was therefore excluded  
24 from the analysis.

1 **Comparison of MSA patients with PSP and IPD patients studied earlier**

2 While clearly retrospective, we have taken the liberty to compare the MSA patients results obtained  
3 here with the group of PSP patients that we studied in 2001<sup>14</sup> and a subgroup of IPD patients  
4 studied in 1999 with identical electrophysiological methods (numbers 1-4 and 6-11 according to  
5 Table 1 in<sup>12</sup>, selected to match **as good as possible** the current MSA group with regard to the disease  
6 severity (according to UPDRS part III), **even though retrospective matching based in part on**  
7 **different scales used in different laboratories is certainly not perfect**. Demographical data are cited  
8 in table 2. In figure 1, 2 and 4, data from these IPD and PSP patients are given in dashed lines.

Table 2

| Nr.  | group | Age    |     | Duration<br>[year] | UPDRS<br>Max=108 | BDI<br>Max=63 | MMS<br>Max=30 | MDRS<br>Max=144 |
|------|-------|--------|-----|--------------------|------------------|---------------|---------------|-----------------|
|      |       | [year] | Sex |                    |                  |               |               |                 |
| 1    | C     | 57     | m   | -                  | -                | 2             |               | 144             |
| 2    | C     | 60     | f   | -                  | -                | 9             |               | 142             |
| 3    | C     | 50     | m   | -                  | -                | 0             |               | 141             |
| 4    | C     | 64     | f   | -                  | -                | 0             |               | 142             |
| 5    | C     | 58     | m   | -                  | -                | 1             |               | 138             |
| 6    | C     | 73     | m   | -                  | -                | 6             |               | 134             |
| 7    | C     | 49     | f   | -                  | -                | 0             |               | 143             |
| 8    | C     | 45     | m   | -                  | -                | 1             |               | 144             |
| 9    | C     | 53     | m   | -                  | -                | 1             |               | 142             |
| 10   | C     | 73     | f   | -                  | -                | 11            | 30            |                 |
| 11   | C     | 72     | f   | -                  | -                | 0             | 30            |                 |
| Mean |       | 59.5   |     |                    |                  | 2.6           |               |                 |
| S.D. |       | 10.0   |     |                    |                  | 3.6           |               |                 |
| 1    | IPD   | 69     | f   | 2                  | 45               | 11            |               | 138             |
| 2    | IPD   | 64     | f   | 6                  | 39               | 15            |               | 143             |
| 3    | IPD   | 62     | m   | 5                  | 21               | 9             |               | 132             |
| 4    | IPD   | 45     | m   | 6                  | 28               | 5             |               | 141             |
| 5    | IPD   | 47     | m   | 7                  | 31               | 6             |               | 139             |
| 6    | IPD   | 49     | m   | 7                  | 25               | 6             |               | 140             |
| 7    | IPD   | 64     | m   | 9                  | 47               | 11            |               | 135             |
| 8    | IPD   | 63     | m   | 8                  | 16               | 11            |               | 141             |
| 9    | IPD   | 61     | m   | 5                  | 33               | 8             |               | 143             |
| 10   | IPD   | 50     | m   | 3                  | 44               | 11            |               | 143             |
| Mean |       | 57.4   |     | 5.8                | 32.9             | 9.3           |               | 139.5           |
| S.D. |       | 8.7    |     | 2.1                | 10.7             | 3.1           |               | 3.7             |
| 1    | PSP   | 54     | m   | 2                  | 22               | 6             | 30            | 127             |
| 2    | PSP   | 69     | m   | 9                  | 34               | 0             | 28            | 110             |
| 3    | PSP   | 65     | f   | 2                  | 44               | 13            | 28            | 107             |
| 4    | PSP   | 57     | f   | 3                  | 30               | 35            | 30            | 135             |
| 5    | PSP   | 66     | m   | 2                  | 30               | 13            | 28            | 135             |
| 6    | PSP   | 59     | m   | 6                  | 50               | 4             | 22            | 100             |
| 7    | PSP   | 68     | f   | 4                  | 43               | 50            | 18            | 116             |
| 8    | PSP   | 63     | m   | 5                  | 54               | *             | 23            | 112             |
| Mean |       | 62.6   |     | 4.1                | 38.4             | 17.3          | 25.9          | 117.8           |
| S.D. |       | 5.4    |     | 2.5                | 11.1             | 18.4          | 4.4           | 13.1            |

## Data analysis

UPDRS scores in the patient groups, and age in all four groups, were compared using factorial ANOVAs with group (three or four levels) as between-subject factor. R2 latencies were measured off-line. For analysis of the blink reflex recovery cycle, we entered the R2 amplitudes of the second pulse normalized to the R2 amplitudes of the first pulse into a repeated measures analysis of variance (ANOVA) with “interstimulus interval” (three levels: 100; 300, 600 ms) as within subject factor and “group” (two levels: control and MSA; or four levels: control, MSA, IPD, PSP) as

1 between subject factor.<sup>12 21 22</sup> In the EBCC, EMG bursts were regarded as present if their peak-to-  
2 peak amplitude exceeded baseline noise by at least 1.5 fold and reached at least 50  $\mu$ V. They were  
3 counted as alpha-blinks, i.e. startle responses, or conditioned responses (CRs) if they occurred  
4 within the appropriate time window (alpha blinks: within 200ms after onset of tone (CS); CRs:  
5 within 200 ms before electrical stimulus (UCS)). For the tone-alone-trials we extended the time  
6 window until 300 ms after the end of the UCS to detect delayed CRs.<sup>27</sup> Random blinks were  
7 counted as EMG bursts occurring in the CR time window in the absence of a CS, i.e. in the UCS  
8 only trials. Their occurrence rate was reported numerically. We analyzed the percentage of  
9 conditioned eyeblink responses repeated measures ANOVAs with “block” (six levels: blocks 1-6)  
10 as within subject factor and “group” (two levels: control and MSA; or four levels: control, MSA,  
11 IPD, PSP) and “paradigm” (two levels: delay versus trace) as between subject factors. In addition,  
12 we repeated the ANOVAs for conditioned eyeblink responses with the individual average alpha  
13 blink rate across blocks 1-6 as covariate. We calculated separate repeated measures ANOVAs for  
14 the tone alone trials (trial 11, block 1-6), with “block” (six levels: blocks 1-6) as within subject  
15 factor and “group” (two levels: control and MSA; or four levels: control, MSA, IPD, PSP) and  
16 “paradigm” (two levels: delay versus trace) as between subject factors. For alpha blink rate, we  
17 calculated a repeated-measures ANOVA with “block” (seven levels: blocks 1-6 and CS only block)  
18 as within subject factor and “group” (two levels: control and MSA; or four levels: control, MSA,  
19 IPD, PSP) and “paradigm” (two levels: delay versus trace) as between subject factors.

20 For SRTT, we analyzed reaction time, accuracy errors and retrieval using separate repeated  
21 measures ANOVAs with “block” (seven levels: blocks 1-7) as within subject factor and “group”  
22 (two levels: control and MSA; or four levels: control, MSA, IPD, PSP) as between subject factor.  
23 Post-hoc, we compared the effect change between from the last sequence block 6 to random block  
24 7, which is considered a measure of implicit learning, within group and with uncorrected, two-tailed  
25 t-tests.

1 In all analyses, Mauchly's sphericity test was performed and Greenhouse–Geisser correction  
2 was applied when necessary. The level of significance was set at  $p < 0.05$ . Post-hoc t-tests were  
3 calculated for the four-group comparisons and Bonferroni-corrected. A correlation between two  
4 parameters was determined by calculating Pearson's correlation coefficient and was reported if it  
5 was higher than 0.75 or lower than -0.75. The results are given as mean values  $\pm$  one standard  
6 deviation.

## 8 RESULTS

### 9 Rating scales

10 Details of age, sex, disease duration, L-Dopa response and rating scales of MSA patients are  
11 displayed in **table 1**. UPDRS scores for motor impairment placed the patients in an intermediately  
12 impaired range. The Hamilton depression score revealed mild depressive symptoms (mean  $12.5 \pm 6.2$   
13 out of 69 points) and the Mini-Mental State scored between 26 and 30 points (mean  $28.0 \pm 1.4$ )  
14 indicating mild cognitive impairment in more than half of the patients. These results are comparable  
15 to the IPD and PSP groups reported earlier.<sup>12 14</sup> The UPDRS score did not differ between the three  
16 patient groups (factorial ANOVA; no effect of group, no post-hoc difference on Bonferroni-  
17 corrected t-tests); in addition, all four groups did not differ with regard to age.

### 19 Blink reflex pathways

20 Blink reflex responses in MSA patients showed normal latencies (ipsilateral R1:  $11.6 \pm 1.0$  ms,  
21 ipsilateral R2:  $31.5 \pm 4.9$  ms contralateral R2:  $34.4 \pm 4.1$  ms). An R2 recovery cycle could be obtained  
22 in all patients (**figure 1**) with no significant side difference between the ipsi- and contralateral R2  
23 recovery. MSA patients showed significantly less R2 inhibition compared to the control group  
24 (repeated-measures ANOVA MSA-controls, effect of group,  $F(1, 20) = 15.0$ .  $p = 0.001$ ).



-- Please insert fig. 1 about here --

### Conditioned eyeblink responses

All MSA patients showed few random blinks as assessed by the UCS only trials ( $3.0 \pm 6.7$  % across both paradigms). The conditioned responses (CRs) were first analyzed for block 1-6 excluding the tone alone trials (see below). In either paradigm MSA patients showed significantly fewer CRs than the control group (**figure 2**; repeated-measures ANOVA MSA-control, effect of group,  $F(1, 39) = 37.1$ ,  $p < 0.0001$ ; effect of block,  $F(3.4, 39) = 7.0$ ,  $p < 0.0001$ ; interaction of group by block,  $F(3.4, 266) = 3.325$ ,  $p = 0.017$ , no main effect of paradigm). Adding the rate of alpha blinks as covariate to the ANOVA did not abolish the effect of group ( $F(1, 38) = 31.5$ ,  $p < 0.0001$ ).

These results were supported by a separate analysis of the tone alone trials (trial 11, block 1-6), in which the MSA group yielded an average number of CRs of  $14 \pm 17$  % in the delay and  $12 \pm 17$  % in the trace paradigm, which was significantly less than the control group with  $73 \pm 23$  % and  $55 \pm 27$  % of CRs respectively (ANOVA MSA-control, effect of group,  $F(1, 37) = 59.1$ ,  $p < 0.0001$ ). There was again no main effect of paradigm, i.e. trace and delay paradigm did not differ from each other.

~~Considering the MSA patients only, there was no difference in the occurrence of CRs between MSA-P and MSA-C patients (ANOVA, effect of MSA subtype,  $F(1, 17) = 2.5$ ,  $p = 0.13$ ).~~

-- Please insert fig. 2 about here -

### Alpha Blinks

In either paradigm MSA patients tended to show less alpha blinks than controls (repeated measures ANOVA, effect of group  $F(1, 38) = 4.0$ ,  $p = 0.054$ ; **figure 3**). The mean percentage of alpha blinks across all blocks in MSA patients was  $17.6 \pm 4.6$  % in the delay and  $14.4 \pm 4.1$  % in the trace paradigm, for control subjects  $31.5 \pm 11.1$  % and  $35.2 \pm 11.3$  % respectively. There were significantly more alpha blinks in earlier blocks than in late blocks for both paradigms (effect of block,  $F(4.3,$

1 163.7)=8.5,  $p<0.0001$ ). ~~Considering the MSA patients only, there was no statistically significant~~  
2 ~~difference in the occurrence of alpha blinks between MSA-P and MSA-C patients.~~

3  
4 -- Please insert fig. 3 about here --  
5

## 6 **Serial reaction time task (SRTT)**

### 7 *Reaction time*

8 MSA patients showed longer reaction times compared with controls (repeated measures ANOVA  
9 MSA-control, effect of group,  $F(1,18)=20.2$ ,  $p<0.0001$ ; and a trend for an interaction of group by  
10 block,  $F(1.52, 27.34)=2.77$ ,  $p=0.10$ , **figure 4A**). In both groups reaction times decreased from block  
11 1 to the sequence blocks 3, 4, 5 and 6 (effect of block,  $F(1.52, 27.34)=5.5$ ,  $p=0.016$ ). The reaction  
12 time increase from sequence block 6 to random block 7, which is considered a measure of implicit  
13 learning, was significant in the control group only (t-test  $p<0.01$ ; MSA  $p=0.1$ ).

14  
15 -- Please insert fig. 4 about here --  
16

### 17 *Accuracy errors*

18 The average error rate of MSA patients across blocks was  $19.7\pm 4.2\%$ , which is significantly higher  
19 compared to controls with a rate of  $2.6\pm 0.8\%$  (repeated measures ANOVA MSA-control, effect of  
20 group,  $F(1,18)=10.1$ ,  $p=0.005$ ). In both groups error rates decreased from the first random to the  
21 sequence blocks (effect of block,  $F(3.37, 42.66)=3.9$ ,  $p=0.022$ ) and tended to increase between the  
22 last sequence block and the random block 7 without being significant.

### 24 *Retrieval of sequence*

25 There was no significant difference between MSA patients and controls in the measures of sequence  
26 detection (manual sequence retrieval, ANOVA MSA-control, effect of group,  $F(1,18)=0.7$ ,  $p=0.42$ ).

1 Both groups remembered more items of the sequence in post block reproduction of the last 10 items  
2 during the course of the experiment (ANOVA, effect of block,  $F(3.58, 64.48)=31.0, p<0.001$ ). A  
3 small percentage of repetition was seen even before the sequence was presented, which indicates the  
4 baseline guessing rate (figure 4B).

### 6 Correlation analyses for MSA patients

7 We did not find a significant correlation between the average number of CRs across block 3-6  
8 (steady state) and the duration of disease, the Hamilton scale score, the MMST, the motor  
9 examination of the UPDRS, the cerebellar or autonomic impairment as assessed by the scores (see  
10 table 1) for either paradigm. The percentage of manual retrieval in the SRTT did not correlate with  
11 any of these parameters either.

### 13 Retrospective comparison of all patient groups (MSA, PSP, IPD) and the control group

14 In the blink reflex recovery cycle, the R2 inhibition was not different between the patient groups  
15 (figure 1). For the EBCC paradigms, the lack of eyeblink conditioning in MSA patients was similar  
16 to the PSP group and differed significantly from the increasing occurrence of CRs in IPD patients  
17 and controls (ANOVA, effect of group,  $F(3,63)=23.2, p<0.0001$ ; interaction of group by block,  
18  $F(11.1, 233.0)=3.6, p<0.0001$ ; figure 2). Post-hoc t-test with Bonferroni correction confirmed a  
19 difference between MSA patients and PD patients, and between MSA patients and control subjects.  
20 Adding the rate of alpha blinks as covariate did not abolish the effect of group ( $F(1, 32)= 16.7,$   
21  $p<0.0001$ ). Also in the tone alone trials, MSA and PSP patients showed fewer CRs than the IPD and  
22 control groups (ANOVA, effect of group,  $F(3,64)=19.0, p<0.0001$ ; interaction of group by block,  
23  $F(15,320)=1.8, p=0.04$ ). MSA and PSP groups both showed fewer alpha blinks than IPD patients  
24 and controls (ANOVA, effect of group,  $F(3,61)=3.5, p=0.02$ ; interaction of group by block  
25 ( $F(12.73, 259.0)=2.0, p=0.025$ ; see figure 3). However, with post-hoc, Bonferroni-corrected t-tests  
26 these differences were not significant.

1 For the differentiation of MSA and PSP from IPD we considered the mean percentage of CRs  
2 in the steady state part of the EBCC learning curve (blocks 3-6). The mean percentage of CRs  
3 allows a non-overlapping separation of the MSA and PSP groups from IPD in the trace paradigm  
4 with a cutoff at 26% (**figure 5**). In the delay paradigm, the separation between groups was less  
5 complete. Whereas all PSP patients exhibited less than 26% of CRs, the fraction of MSA patients  
6 with values equal or below 26% was 0.91. This corresponds to sensitivity values for the separation  
7 of PSP and MSA from IPD of 100% and 91%, respectively. If the specificity is defined as the  
8 fraction of IPD patients with CRs values above 26%, the specificity in the delay paradigm is 75%.  
9 As reported above, the sensitivity and specificity values for the trace paradigm are 100%. The  
10 slightly better performance of IPD patients<sup>13</sup> as compared to controls was not significant.

11  
12 -- Please insert fig. 5 about here --  
13

14 In the SRTT, MSA patients showed significantly longer reaction times than the IPD patients,  
15 but no significant difference compared to the PSP group (ANOVA: effect of group  $F(3,30)=7.4$ ,  
16  $p=0.001$ ; see figure 4). With regard to the error rate, MSA patients performed again very similar to  
17 the PSP patients, who showed  $19.5\pm 1.8\%$  accuracy errors, but significantly worse than the IPD  
18 patients (error rate  $4.8\pm 1.7\%$ ; ANOVA, effect of group,  $F(3,32)=6.1$ ,  $p=0.002$ ). The sequence recall  
19 measurements revealed no statistically significant differences between groups.

## 20 21 **DISCUSSION**

22 The differentiation of IPD and atypical Parkinsonian syndromes (MSA, PSP) constitutes a challenge  
23 for neurologists, as the motor symptoms often present very similarly, in particular in the early  
24 stages. Additional markers such as imaging have been evaluated,<sup>28 29</sup> but these provide insufficient  
25 sensitivity values or are technically challenging. In addition, macroscopically discernible structural  
26 changes as detectable by MRI are likely to occur some time after functional loss has begun.

1 Therefore functional tests might be better suited because they reveal deficits before discernible  
2 structural changes occur. In this study we focus on the differential learning abilities tested by  
3 eyeblink conditioning (EBCC) and a serial reaction time task (SRTT). First, the results of the MSA  
4 patients will be discussed, followed by a comparison with PSP and the putative impact for  
5 differentiation from IPD.

6 The MSA patients showed severely impaired implicit learning in the trace as well as in the  
7 delay eyeblink conditioning paradigm, with standard deviations in the range of other studies,<sup>10 30</sup>  
8 whereas non-learning associated blink reflex latencies as indicators of oculomotor pathways were  
9 normal.

10 Histopathological alterations in both subtypes of MSA include the substantia nigra, putamen,  
11 descending and ascending fiber tracts of the motor system, olivary and pontine nuclei, brainstem-  
12 cerebellar circuits as well as cerebellar structures (hemispheres and vermis).<sup>31-33</sup> This has been  
13 confirmed *in vivo* by diffusion tensor imaging of white matter microstructure.<sup>34</sup> We suggest that  
14 damage of cerebellar structures and associated brainstem-cerebellar circuits are responsible for the  
15 failure of EBCC learning in MSA patients. This assumption is supported by the findings of impaired  
16 EBCC in patients with cerebellar damage,<sup>27 35-37</sup> positron-emission tomography (PET)  
17 measurements in healthy humans showing changes in glucose metabolism in the cerebellum and  
18 pons during EBCC<sup>23 38</sup> as well as in experiments studying the influence of selective  
19 pharmacological blockade of cerebellar input on EBCC in rabbits.<sup>39</sup> Most patients in our study were  
20 clinically characterized as MSA-P and not MSA-C. However, the failure in blink reflex acquisition  
21 in both groups points to a subclinical cerebellar involvement in MSA-P, which is in accordance  
22 with the histopathological studies.<sup>32 33</sup> EBCC therefore seems to detect cerebellar involvement at a  
23 subclinical stage.

24 In addition to the cerebellum, several studies indicate that acquisition of CR in the trace  
25 paradigm depends on forebrain areas such as the hippocampus or prefrontal cortex, in particular for  
26 longer interstimulus intervals.<sup>40 41</sup> In our study, the failure of CR acquisition in MSA patients was

1 slightly more pronounced in the trace compared to the delay paradigm. Therefore, lesions of the  
2 frontal lobe, which have been suggested by neuropsychological testing<sup>6 42</sup> and confirmed  
3 histopathologically in a variety of MSA cases,<sup>43 44</sup> may have contributed to impaired EBCC  
4 acquisition in the trace paradigm.

5 An alternative explanation that was brought up by an anonymous reviewer is that the tone may  
6 be a less salient CS to the MSA patients than to the control group. The reduced number of alpha  
7 blinks would support this assumption. Following that very elegant line of thought, the EBCC group  
8 difference between MSA patients and control subjects would have to do less with implicit learning  
9 and more with responsiveness and associative processes related to external stimuli. While this may  
10 have some relevance, adding the number of alpha blinks to the ANOVAs on conditioned eyeblink  
11 responses did not abolish the between-group differences.

12 In the SRTT the MSA patients showed severe impairment in terms of prolonged reaction time,  
13 high error rate and, in some patients, early discontinuation due to fatigue and exhaustion. In contrast  
14 to the control group they showed no significant reaction time increase between block 6 (random)  
15 and 7 (sequence) and this is indicative of implicit learning deficits. On the other hand they showed  
16 good performance on the parameters of sequence recall (explicit learning). This preservation of  
17 SRTT explicit learning parts may be explained by the relative preservation of posterior association  
18 (temporal and parietal) cortex and hippocampus in MSA. **It has to be interpreted with some caution,**  
19 **though, given limitations of spatial working memory in MSA.**<sup>42</sup> However, the validity of the SRTT  
20 learning results is limited by the discontinuation of patients and our “last observation carried  
21 forward approach” (see Methods). In addition, the patients’ **wide range of** motor impairment, which  
22 may interfere with the motor part of the task, and the fact that sequence learning and movement  
23 preparation seem to share similar attentional and working memory resources<sup>45</sup> have to be  
24 considered. Therefore the SRTT seems to be inappropriate to assess learning abilities in MSA  
25 patients. This is in contrast to the EBCC, which is independent of the motor performance of

1 patients. Furthermore, EBCC circuits are located anatomically closer to the affected brainstem  
2 regions.

3 With all the limitations of such a retrospective comparison of data acquired in different patient  
4 groups by the same authors, the implicit learning impairment in MSA patients as clearly revealed by  
5 the EBCC and with some limitation by the SRTT parallels the previously reported findings in PSP  
6 patients.<sup>14</sup> Interestingly, MSA and PSP are characterized by different histopathological alterations,  
7  $\alpha$ -synuclein positive inclusions versus tau-positive aggregations, which lead to presume different  
8 pathophysiological mechanisms. However, the common involvement of cerebellar structures in both  
9 diseases<sup>31 46</sup> seems to be responsible for the clinical phenomenology independent of the cellular  
10 mechanism.

11 In contrast to MSA and PSP, IPD patients show normal<sup>12</sup> or even enhanced<sup>13</sup> acquisition of  
12 conditioned responses in EBCC. EBCC may therefore contribute to distinguish IPD from these  
13 atypical Parkinsonian syndromes. As the development of cerebellar and related neuropathology in  
14 MSA or PSP often occurs prior to or even without clinical manifestation,<sup>33 46</sup> we propose impaired  
15 EBCC particularly in the trace paradigm as an early indicator of neurodegeneration of areas beyond  
16 those typically affected in IPD. However, as the retrospective synopsis is clearly limited, the pivotal  
17 questions of whether EBCC can serve as predictor for the development of typical or atypical disease  
18 and whether EBCC is a useful addition to imaging techniques in establishing an early differential  
19 diagnosis are unanswered yet and require further prospective investigation.

20

1  
2  
3  
4  
5  
6  
7  
8  
9  
10  
11  
12  
13  
14  
15  
16  
17  
18  
19  
20  
21  
22  
23  
24  
25  
26  
27  
28  
29  
30  
31  
32  
33  
34  
35  
36  
37  
38  
39  
40  
41  
42  
43  
44  
45  
46  
47  
48  
49  
50  
51  
52  
53  
54  
55  
56  
57  
58  
59  
60

## 1 Acknowledgements

2 We thank Prof. Mark Hallett for commenting on an earlier draft of the manuscript.

## 4 Funding

5 This work was supported by the Deutsche Forschungsgemeinschaft (DFG, grant SO 429/2-2  
6 (M.S.)), by the Bernstein Center for Computational Neuroscience (grant # 01GQ0432 (W.P.)) and  
7 by the University of Göttingen (Heidenreich von Siebold-Programm (F.v.L.)).

## 9 Contributors

10 All authors listed above fulfill all three International Committee of Medical Journal Editors  
11 (ICMJE) guidelines for authorship which are (1) substantial contributions to conception and design,  
12 acquisition of data or analysis and interpretation of data; (2) drafting the article or revising it  
13 critically for important intellectual content and (3) final approval of the version to be published.  
14 MSo, CT and WP conceived the study. MSch, FvL and MSo were responsible for obtaining the  
15 data. FvL and MSo conducted the data analysis. All authors contributed to decisions on the  
16 interpretation of results. FvL and MSo contributed to the drafting of the manuscript. CT and WP  
17 were responsible for editing and providing guidance on the paper. All authors were responsible for  
18 critically revising the paper. All authors approved the final version of the manuscript prior to  
19 submission.

20  
21 **Competing interests** None

22  
23 **Ethics approval** Ethics committee of the Medical Faculty of the University of Goettingen.

24  
25 **Data sharing statement** There are no additional data available.



1  
2  
3  
4  
5  
6  
7  
8  
9  
10  
11  
12  
13  
14  
15  
16  
17  
18  
19  
20  
21  
22  
23  
24  
25  
26  
27  
28  
29  
30  
31  
32  
33  
34  
35  
36  
37  
38  
39  
40  
41  
42  
43  
44  
45  
46  
47  
48  
49  
50  
51  
52  
53  
54  
55  
56  
57  
58  
59  
60  
1 REFERENCES

- 2 1. Kollensperger M, Geser F, Ndayisaba JP, Boesch S, Seppi K, Ostergaard K, et al.  
3 Presentation, diagnosis, and management of multiple system atrophy in  
4 Europe: final analysis of the European multiple system atrophy registry. *Mov*  
5 *Disord* 2010;25(15):2604-12.
- 6 2. Gilman S, Wenning GK, Low PA, Brooks DJ, Mathias CJ, Trojanowski JQ, et al.  
7 Second consensus statement on the diagnosis of multiple system atrophy.  
8 *Neurology* 2008;71(9):670-6.
- 9 3. Poewe W, Wenning G. The differential diagnosis of Parkinson's disease. *Eur J*  
10 *Neurol* 2002;9 Suppl 3:23-30.
- 11 4. Hughes AJ, Daniel SE, Ben-Shlomo Y, Lees AJ. The accuracy of diagnosis of  
12 parkinsonian syndromes in a specialist movement disorder service. *Brain*  
13 2002;125(Pt 4):861-70.
- 14 5. Lange KW, Tucha O, Alders GL, Preier M, Csoti I, Merz B, et al. Differentiation  
15 of parkinsonian syndromes according to differences in executive functions. *J*  
16 *Neural Transm* 2003;110(9):983-95.
- 17 6. Burk K, Daum I, Rub U. Cognitive function in multiple system atrophy of the  
18 cerebellar type. *Mov Disord* 2006;21(6):772-6.
- 19 7. Robbins TW, James M, Owen AM, Lange KW, Lees AJ, Leigh PN, et al.  
20 Cognitive deficits in progressive supranuclear palsy, Parkinson's disease, and  
21 multiple system atrophy in tests sensitive to frontal lobe dysfunction. *J Neurol*  
22 *Neurosurg Psychiatry* 1994;57(1):79-88.
- 23 8. Kehagia AA, Barker RA, Robbins TW. Neuropsychological and clinical  
24 heterogeneity of cognitive impairment and dementia in patients with  
25 Parkinson's disease. *Lancet Neurol* 2010;9(12):1200-13.
- 26 9. Balas M, Balash Y, Giladi N, Gurevich T. Cognition in multiple system atrophy:  
27 neuropsychological profile and interaction with mood. *J Neural Transm*  
28 2010;117(3):369-75.
- 29 10. Hoffland BS, Kassavetis P, Bologna M, Teo JT, Bhatia KP, Rothwell JC, et al.  
30 Cerebellum-dependent associative learning deficits in primary dystonia are  
31 normalized by rTMS and practice. *Eur J Neurosci* 2013;2013(31):1-6.
- 32 11. Christian KM, Thompson RF. Neural substrates of eyeblink conditioning:  
33 acquisition and retention. *Learn Mem* 2003;10(6):427-55.
- 34 12. Sommer M, Grafman J, Clark K, Hallett M. Learning in Parkinson's disease:  
35 eyeblink conditioning, declarative learning, and procedural learning. *J Neurol*  
36 *Neurosurg Psychiatry* 1999;67(1):27-34.
- 37 13. Daum I, Schugens MM, Breitenstein C, Topka H, Spieker S. Classical eyeblink  
38 conditioning in Parkinson's disease. *Mov Disord* 1996;11(6):639-46.
- 39 14. Sommer M, Grafman J, Litvan I, Hallett M. Impairment of eyeblink classical  
40 conditioning in progressive supranuclear palsy. *Mov Disord* 2001;16(2):240-  
41 51.

- 1 15. Soliveri P, Brown RG, Jahanshahi M, Caraceni T, Marsden CD. Learning manual  
2 pursuit tracking skills in patients with Parkinson's disease. *Brain* 1997;120 ( Pt  
3 8)(Pt 8):1325-37.
- 4 16. Hwang EJ, Smith MA, Shadmehr R. Dissociable effects of the implicit and  
5 explicit memory systems on learning control of reaching. *Exp Brain Res*  
6 2006;173(3):425-37.
- 7 17. Tomlinson CL, Stowe R, Patel S, Rick C, Gray R, Clarke CE. Systematic review  
8 of levodopa dose equivalency reporting in Parkinson's disease. *Mov Disord*  
9 2010;25(15):2649-53.
- 10 18. Hamilton M. A rating scale for depression. *J Neurol Neurosurg Psychiatry*  
11 1960;23:56-62.
- 12 19. Folstein MF, Folstein SE, McHugh PR. "Mini-mental state". A practical method  
13 for grading the cognitive state of patients for the clinician. *J Psychiatr Res*  
14 1975;12(3):189-98.
- 15 20. Fahn S, Elton R, Committee amotUD. *Recent developments in Parkinson's*  
16 *disease*. Florham Park, NJ: Macmillan Healthcare Information, 1987.
- 17 21. Sommer M, Wobker G, Ferbert A. Voluntary eyelid contraction modifies the  
18 blink reflex recovery cycle. *Acta Neurol Scand* 1998;98(1):29-35.
- 19 22. Kimura J. The blink reflex. In: Kimura J, editor. *Electrodiagnosis in diseases of*  
20 *nerve and muscle: principles and practice*. Philadelphia: Davis, F. A.,  
21 1989:307-331.
- 22 23. Molchan SE, Sunderland T, McIntosh AR, Herscovitch P, Schreurs BG. A  
23 functional anatomical study of associative learning in humans. *Proc Natl Acad*  
24 *Sci U S A* 1994;91(17):8122-6.
- 25 24. Pascual-Leone A, Grafman J, Clark K, Stewart M, Massaquoi S, Lou JS, et al.  
26 Procedural learning in Parkinson's disease and cerebellar degeneration. *Ann*  
27 *Neurol* 1993;34(4):594-602.
- 28 25. Moiseello C, Crupi D, Tunik E, Quartarone A, Bove M, Tononi G, et al. The serial  
29 reaction time task revisited: a study on motor sequence learning with an arm-  
30 reaching task. *Exp Brain Res* 2009;194(1):143-55.
- 31 26. Bo J, Jennett S, Seidler RD. Working memory capacity correlates with implicit  
32 serial reaction time task performance. *Exp Brain Res* 2011;214(1):73-81.
- 33 27. Topka H, Valls-Sole J, Massaquoi SG, Hallett M. Deficit in classical  
34 conditioning in patients with cerebellar degeneration. *Brain* 1993;116 ( Pt  
35 4):961-9.
- 36 28. Mahlke P, Hotter A, Hussl A, Esterhammer R, Schocke M, Seppi K.  
37 Significance of MRI in diagnosis and differential diagnosis of Parkinson's  
38 disease. *Neurodegener Dis* 2010;7(5):300-18.
- 39 29. von Lewinski F, Werner C, Jorn T, Mohr A, Sixel-Doring F, Trenkwalder C.  
40 T2\*-weighted MRI in diagnosis of multiple system atrophy. A practical  
41 approach for clinicians. *J Neurol* 2007;254(9):1184-8.
- 42 30. Holloway JL, Trivedi P, Myers CE, Servatius RJ. Enhanced conditioned eyeblink  
43 response acquisition and proactive interference in anxiety vulnerable  
44 individuals. *Front Behav Neurosci* 2012;6(76).

- 1  
2  
3  
4  
5  
6  
7  
8  
9  
10  
11  
12  
13  
14  
15  
16  
17  
18  
19  
20  
21  
22  
23  
24  
25  
26  
27  
28  
29  
30  
31  
32  
33  
34  
35  
36  
37  
38  
39  
40  
41  
42  
43  
44  
45  
46  
47  
48  
49  
50  
51  
52  
53  
54  
55  
56  
57  
58  
59  
60
- 1 31. Braak H, Rub U, Del Tredici K. Involvement of precerebellar nuclei in multiple  
2 system atrophy. *Neuropathol Appl Neurobiol* 2003;29(1):60-76.
  - 3 32. Wenning GK, Tison F, Elliott L, Quinn NP, Daniel SE. Olivopontocerebellar  
4 pathology in multiple system atrophy. *Mov Disord* 1996;11(2):157-62.
  - 5 33. Ozawa T, Paviour D, Quinn NP, Josephs KA, Sangha H, Kilford L, et al. The  
6 spectrum of pathological involvement of the striatonigral and  
7 olivopontocerebellar systems in multiple system atrophy: clinicopathological  
8 correlations. *Brain* 2004;127(Pt 12):2657-71.
  - 9 34. Nair SR, Tan LK, Mohd Ramli N, Lim SY, Rahmat K, Mohd Nor H. A decision  
10 tree for differentiating multiple system atrophy from Parkinson's disease using  
11 3-T MR imaging. *Eur Radiol* 2013;10.
  - 12 35. Gerwig M, Dimitrova A, Kolb FP, Maschke M, Brol B, Kunnel A, et al.  
13 Comparison of eyeblink conditioning in patients with superior and posterior  
14 inferior cerebellar lesions. *Brain* 2003;126(Pt 1):71-94.
  - 15 36. Gerwig M, Haerter K, Hajjar K, Dimitrova A, Maschke M, Kolb FP, et al. Trace  
16 eyeblink conditioning in human subjects with cerebellar lesions. *Exp Brain  
17 Res* 2006;170(1):7-21.
  - 18 37. Daum I, Schugens MM, Ackermann H, Lutzenberger W, Dichgans J, Birbaumer  
19 N. Classical conditioning after cerebellar lesions in humans. *Behav Neurosci*  
20 1993;107(5):748-56.
  - 21 38. Logan CG, Grafton ST. Functional anatomy of human eyeblink conditioning  
22 determined with regional cerebral glucose metabolism and positron-emission  
23 tomography. *Proc Natl Acad Sci U S A* 1995;92(16):7500-4.
  - 24 39. Attwell PJ, Ivarsson M, Millar L, Yeo CH. Cerebellar mechanisms in eyeblink  
25 conditioning. *Ann N Y Acad Sci* 2002;978:79-92.
  - 26 40. Clark RE, Squire LR. Classical conditioning and brain systems: the role of  
27 awareness. *Science* 1998;280(5360):77-81.
  - 28 41. Takehara-Nishiuchi K, Kawahara S, Kirino Y. NMDA receptor-dependent  
29 processes in the medial prefrontal cortex are important for acquisition and the  
30 early stage of consolidation during trace, but not delay eyeblink conditioning.  
31 *Learn Mem* 2005;12(6):606-14.
  - 32 42. Robbins TW, James M, Lange KW, Owen AM, Quinn NP, Marsden CD.  
33 Cognitive performance in multiple system atrophy. *Brain* 1992;115 Pt 1:271-  
34 91.
  - 35 43. Konagaya M, Konagaya Y, Sakai M, Matsuoka Y, Hashizume Y. Progressive  
36 cerebral atrophy in multiple system atrophy. *J Neurol Sci* 2002;195(2):123-7.
  - 37 44. Armstrong RA, Lantos PL, Cairns NJ. Multiple system atrophy: laminar  
38 distribution of the pathological changes in frontal and temporal neocortex--a  
39 study in ten patients. *Clin Neuropathol* 2005;24(5):230-5.
  - 40 45. Marinelli L, Perfetti B, Moisello C, Di Rocco A, Eidelberg D, Abbruzzese G, et  
41 al. Increased reaction time predicts visual learning deficits in Parkinson's  
42 disease. *Mov Disord* 2010;25(10):1498-501.
  - 43 46. Jellinger KA, Bancher C. Neuropathology. In: Litvan I, Agid Y, editors.  
44 *Progressive supranuclear palsy*. New York: University Press, 1992:45-88.

- 1 47. Coblenz JM, Mattis S, Zingesser L. Presenile dementia. Clinical aspects and  
 2 evaluation of cerebrospinal fluid dynamics. *Archives of Neurology*  
 3 1973;29:299-308.  
 4 48. Schmidt R, Freidl W, Fazekas F, Reinhart B, Grieshofer P, Koch M, et al. The  
 5 Mattis Dementia Rating Scale: normative data from 1,001 healthy volunteers.  
 6 *Neurology* 1994;44(5):964-6.  
 7 49. Llebaria G, Pagonabarraga J, Kulisevsky J, Garcia-Sanchez C, Pascual-Sedano  
 8 B, Gironell A, et al. Cut-off score of the Mattis Dementia Rating Scale for  
 9 screening dementia in Parkinson's disease. *Mov Disord* 2008;23(11):1546-50.  
 10 50. Beck AT, Steer RA, Garbin MG. Inventory for measuring depression. *Arch Gen*  
 11 *Psychiatry* 1961;4:561-571.  
 12 51. Sommer M, Grafman J, Clark K, Hallett M. Learning in Parkinson's disease:  
 13 eyeblink conditioning, declarative learning, and procedural learning. *J Neurol*  
 14 *Neurosurg Psychiatry* 1999;67:27-34.

## 17 Legends to tables and figures

18 **Table 1:** Characteristics of the MSA patients. Type: Parkinsonian (MSA-P) or cerebellar (MSA-C)  
 19 predominance; LED = L-Dopa equivalent dose, + indicates additional budipine medication, #  
 20 additional anticholinergic medication; UPDRS = Unified Parkinson's disease rating scale, motor  
 21 examination only (high number of points indicates high disability); MMS= Mini Mental State (30  
 22 points are normal,  $\leq 26$  is usually considered as cognitive impairment). Cerebellar impairment was  
 23 evaluated for ataxia (arm, leg), saccades and intention tremor (finger-nose test), autonomic  
 24 impairment for postural faintness, syncopes, urinary incontinence, urinary retention, faecal  
 25 incontinence and impotence (males only). Pyramidal tract impairment was scored for hyperreflexia  
 26 and Babinski sign. Each item was scored if present with 1, otherwise 0. In the Hamilton scale a low  
 27 score indicates few depressive symptoms. \*not investigated.

28  
 29 **Table 2:** Characteristics of controls, IPD and PSP patients in part taken from earlier publications.<sup>12</sup>

30 <sup>14</sup> Dementia had been ruled out using the Mattis Dementia Rating scale (MDRS)<sup>47 48</sup>, where higher  
 31 scores out of a maximum of 144 indicate better performance, with a cut-off  $\leq 123$  considered as  
 32 cognitive impairment<sup>49</sup>. Depression had been assessed using the Beck Depression Inventory (BDI),

1 where higher scores out of a maximum of 63 points indicate a more severe depressed state, and a  
2 score of 15 is regarded as cut off for a self report of mild depression.<sup>50 51</sup> \*not investigated. The  
3 MDRS was not available at the German study sites.

4  
5 **Figure 1:** Blink reflex recovery cycle with interstimulus intervals of 100, 300 and 600 ms. In MSA  
6 patients, the inhibition of the ipsilateral R2 response to the second stimulus is weaker than in the  
7 control group. Data of MSA patients and controls are indicated as average value and single standard  
8 deviation. Data for IPD and PSP patients (dashed lines) were taken from our earlier studies using  
9 identical methods.<sup>12 14</sup>

10  
11 **Figure 2:** Conditioned eyeblink responses in two different paradigms: left, delay (interstimulus  
12 interval 0 ms), right, trace paradigm (interstimulus interval 600 ms). In both paradigms, the number  
13 of conditioned responses was significantly lower in MSA and PSP patients than in the control and  
14 IPD groups indicating impaired implicit learning. CS, conditioned stimulus (tone), UCS,  
15 unconditioned stimulus (electrical stimulation to the supraorbital nerve). Data of MSA patients and  
16 controls are indicated as average value and single standard deviation. Data for IPD and PSP patients  
17 (dashed lines) were taken from our earlier studies using identical methods.<sup>12 14</sup>

18  
19 **Figure 3:** Occurrence of 'alpha-blinks'. These bursts are a startle reaction to the tone (CS) and are  
20 less frequent in MSA and PSP patients than in the control and IPD groups. Data for IPD and PSP  
21 patients were taken from our earlier studies using identical methods.<sup>12 14</sup> Data are indicated as  
22 average value and single standard deviation and were pooled for both paradigms.

23  
24 **Figure 4: A** Reaction time in a serial reaction time task (SRTT). An implicit learning effect is  
25 indicated by the reaction time increase between the last sequence block (6) and the following  
26 random block (7). **B** Explicit learning in the SRTT was tested after each block by manual retrieval

1 of the sequence (repetition of the last 10 key presses) and revealed no significant difference between  
2 groups. Data are indicated as average value and single standard deviation. Data for IPD and PSP  
3 patients were taken from our earlier studies using identical methods.<sup>12 14</sup> Asterisks indicate a  
4 significant difference for the comparison of blocks 6 and 7 ( $p < 0.05$ , **post-hoc t-test**).

5  
6 **Figure 5:** Overview of the mean percentage of conditioned eyeblink responses (CRs) across blocks  
7 3-6 in the EBCC paradigms in MSA patients and control subjects from this study and in IPD and  
8 PSP patients from earlier studies.<sup>12 14</sup> With the trace paradigm a complete separation between IPD  
9 and the atypical Parkinsonian syndromes MSA and PSP is achieved (cutoff 26%), whereas in the  
10 delay paradigm there is a small overlap between these groups. Overall, IPD patients perform slightly  
11 better than control subjects,<sup>13</sup> further enhancing the group distinction between IPD and atypical  
12 syndromes.
